# Supplementary material for: Regio- and stereoselective [3 + 2] cycloaddition reaction: access to isoxazole-dispirobisoxindoles featuring three contiguous stereocenters
Source: Royal Society of Chemistry journal article supplement (doi:10.1039/c9ob01203f), 2019-01-01
Supplement: c9ob01203f1.pdf [file c9ob01203f1.pdf]

Regio- and stereoselective [3+2] cycloaddition reaction: access  
to isoxazole-dispirobisoxindoles featuring three contiguous stereocenters

Shuang Chen,<sup>a,c</sup> Guan-Lian Wang,<sup>a,c</sup> Sheng-Wen Xu,<sup>a</sup> Min-Yi Tian,<sup>a</sup> Min Zhang,<sup>a</sup> Xiong-Li Liu<sup>\*a</sup>  
and Wei-Cheng Yuan<sup>b</sup>

<sup>a</sup> Guizhou Medicine Edible Plant Resources Application Development Engineering Laboratory,  
Guizhou University, Guiyang, 550025, China.

<sup>b</sup> Key Laboratory for Asymmetric Synthesis & Chirotechnology of Sichuan Province, Chengdu  
Institute of Organic Chemistry, Chinese Academy of Sciences, Chengdu 610041, China.

<sup>c</sup> These two authors contributed equally to this work.

E-mail: xliu1@gzu.edu.cn

## Supporting Information

### Table of Contents

|                                                                                                                       |     |
|-----------------------------------------------------------------------------------------------------------------------|-----|
| 1. General information.....                                                                                           | S2  |
| 2. Typical experimental procedures for catalytic asymmetric synthesis of isoxazole-dispirobisoxindoles <b>3</b> ..... | S2  |
| 3. Characterization data and HPLC conditions of compounds <b>3</b> .....                                              | S7  |
| 4. One-mmol-scale synthesis of the product <b>3ab</b> .....                                                           | S11 |
| 5. X-Ray crystal data for compounds <b>3ab</b> and <b>3ad</b> .....                                                   | S12 |
| 6. The copies of <sup>1</sup> H NMR, <sup>13</sup> C NMR and HPLC spectra for compounds <b>3</b> .....                | S14 |

## 1: General experimental information

Reactions were monitored by thin layer chromatography using UV light to visualize the course of reaction. Purification of reaction products was carried out by flash chromatography on silica gel.  $^1\text{H}$  and  $^{13}\text{C}$ NMR spectra were obtained using a Bruker DPX-400 or DPX-500 spectrometer.  $^1\text{H}$  NMR chemical shifts are reported in ppm ( $\delta$ ) relative to tetramethylsilane (TMS) with the solvent resonance employed as the internal standard. Data are reported as follows: chemical shift, multiplicity (s = singlet, d = doublet, t = triplet, m = multiplet), coupling constants (Hz) and integration.  $^{13}\text{C}$  NMR chemical shifts are reported in ppm ( $\delta$ ) from tetramethylsilane (TMS) with the solvent resonance as the internal standard. Optical rotations were measured with a polarimeter with the solvent indicated. Melting points were measured on an electrothermal digital melting point apparatus.

## 2. Typical experimental procedures for catalytic asymmetric synthesis of isoxazole-dispirobisoxindoles **3**

In an ordinary vial equipped with a magnetic stirring bar, the compound **2** (0.13 mmol, 1.3 equiv.), 5Å molecular sieve (180 mg) and catalyst quinine (3.24 mg, 10 mmol %, 0.01 mmol) were dissolved in 25.0 mL of freshly distilled DCM at  $-35\text{ }^\circ\text{C}$ , and then 3-isothiocyanato oxindole **1** (0.1 mmol) was added. After completion of the reaction, as indicated by TLC, the reaction mixture was directly purified by flash chromatography to yield the desired product **3**.

## 3. Characterization data and HPLC conditions of compounds **3**

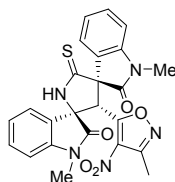

**3aa**: White solid, m.p. 215.2-217.0  $^\circ\text{C}$ ; Yield 93%; 90% ee, >20:1 dr,  $[\alpha]_{\text{D}}^{20} = 129.64$  (c 0.37,  $\text{CH}_2\text{Cl}_2$ ); The ee was determined by HPLC analysis using a Chiralpak IF column (80/20 hexane/*i*-PrOH; flow rate: 1.0 mL/min;  $\lambda = 254\text{ nm}$ ;  $\tau_{\text{major}} = 32.94\text{ min}$ ;  $\tau_{\text{minor}} = 25.33\text{ min}$ );  $^1\text{H}$  NMR ( $\text{DMSO-}d_6$ , 400 MHz)  $\delta$ : 2.07 (s, 3H), 3.10 (s, 3H), 3.11 (s, 3H), 5.88 (s, 1H), 6.97-7.02 (m, 2H),

7.08-7.12 (m, 1H), 7.15-7.18 (m, 1H), 7.29-7.33 (m, 1H), 7.36-7.40 (m, 1H), 7.64 (d,  $J = 7.6$  Hz, 1H), 7.75 (d,  $J = 7.2$  Hz, 1H), 11.32 (br s, 1H);  $^{13}\text{C}$  NMR (DMSO- $d_6$ , 100 MHz)  $\delta$ : 11.3, 27.4, 27.5, 49.6, 70.5, 72.6, 109.5, 110.0, 123.0, 123.3, 125.1, 126.9, 127.8, 130.3, 131.6, 144.0, 145.1, 155.4, 166.0, 173.5, 173.8, 200.2; HRMS (ESI-TOF)  $m/z$ : Calcd. for  $\text{C}_{24}\text{H}_{19}\text{N}_5\text{NaO}_5\text{S}$   $[\text{M}+\text{Na}]^+$ : 512.0999; Found: 512.1004.

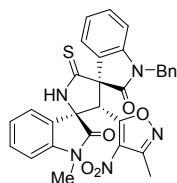

**3ab**: White solid, m.p. 174.5-176.1 °C; Yield 96%; 88% ee, >20:1 dr,  $[\alpha]_{\text{D}}^{20} = 137.00$  (c 0.46,  $\text{CH}_2\text{Cl}_2$ ); The ee was determined by HPLC analysis using a Chiralpak IF column (80/20 hexane/*i*-PrOH; flow rate: 1.0 mL/min;  $\lambda = 254$  nm;  $\tau_{\text{major}} = 83.70$  min;  $\tau_{\text{minor}} = 51.02$  min);  $^1\text{H}$  NMR (DMSO- $d_6$ , 400 MHz)  $\delta$ : 2.09 (s, 3H), 3.12 (s, 3H), 4.75 (d,  $J = 16.0$  Hz, 1H), 5.00 (d,  $J = 16.0$  Hz, 1H), 6.00 (s, 1H), 6.77 (d,  $J = 8.0$  Hz, 1H), 7.03 (d,  $J = 8.0$  Hz, 1H), 7.07-7.10 (m, 1H), 7.17-7.26 (m, 5H), 7.33 (d,  $J = 6.8$  Hz, 2H), 7.37-7.41 (m, 1H), 7.70 (d,  $J = 7.6$  Hz, 1H), 7.81 (d,  $J = 7.6$  Hz, 1H), 11.42 (br s, 1H);  $^{13}\text{C}$  NMR (DMSO- $d_6$ , 100 MHz)  $\delta$ : 11.4, 27.5, 43.9, 49.7, 70.6, 72.7, 110.0, 110.2, 124.9, 127.6, 127.8, 127.9, 129.0, 131.8, 136.2, 144.0, 144.1, 155.4, 165.8, 173.8, 200.0; HRMS (ESI-TOF)  $m/z$ : Calcd. for  $\text{C}_{30}\text{H}_{23}\text{N}_5\text{NaO}_5\text{S}$   $[\text{M}+\text{Na}]^+$ : 588.1312; Found: 588.1315.

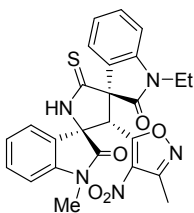

**3ac**: White solid, m.p. 139.9-142.0 °C; Yield 92%; 82% ee, >20:1 dr,  $[\alpha]_{\text{D}}^{20} = 140.61$  (c 0.27,  $\text{CH}_2\text{Cl}_2$ ); The ee was determined by HPLC analysis using a Chiralpak IF column (90/10 hexane/*i*-PrOH; flow rate: 1.0 mL/min;  $\lambda = 254$  nm;  $\tau_{\text{major}} = 49.71$  min;  $\tau_{\text{minor}} = 18.79$  min);  $^1\text{H}$  NMR (DMSO- $d_6$ , 400 MHz)  $\delta$ : 1.06-1.09 (m, 3H), 2.07 (s, 3H), 3.11 (s, 3H), 3.66-3.68 (m, 2H), 5.90 (s, 1H), 7.01-7.09 (m, 3H), 7.16-7.20 (m, 1H), 7.26-7.31 (m, 1H), 7.37-7.41 (m, 1H), 7.61 (d,  $J = 7.2$  Hz, 1H), 7.78 (d,  $J = 7.2$  Hz, 1H), 11.32 (br s, 1H);  $^{13}\text{C}$  NMR (DMSO- $d_6$ , 100 MHz)  $\delta$ : 11.3, 12.6, 27.4, 49.4, 70.4, 72.5, 109.6, 109.9, 122.8, 123.3, 125.3, 127.1, 127.8, 130.4, 131.6, 144.1, 155.4, 166.0, 173.1, 173.8, 200.0; HRMS (ESI-TOF)  $m/z$ : Calcd. for  $\text{C}_{25}\text{H}_{21}\text{N}_5\text{NaO}_5\text{S}$   $[\text{M}+\text{Na}]^+$ :

526.1156; Found: 526.1159.

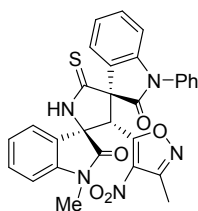

**3ad**: White solid, m.p. 242.7-243.6 °C; Yield 90%; 94% ee, >20:1 dr,  $[\alpha]_{\text{D}}^{20} = 219.68$  (c 0.21, CH<sub>2</sub>Cl<sub>2</sub>); The ee was determined by HPLC analysis using a Chiralpak IF column (90/10 hexane/*i*-PrOH; flow rate: 1.0 mL/min;  $\lambda = 254$  nm;  $\tau_{\text{major}} = 51.34$  min;  $\tau_{\text{minor}} = 22.04$  min); <sup>1</sup>H NMR (DMSO-*d*<sub>6</sub>, 400 MHz)  $\delta$ : 2.11 (s, 3H), 3.12 (s, 3H), 5.95 (s, 3H), 6.67 (d,  $J = 7.2$  Hz, 1H), 7.04 (d,  $J = 7.6$  Hz, 1H), 7.10-7.14 (m, 1H), 7.19-7.26 (m, 2H), 7.36-7.47 (m, 4H), 7.55-7.59 (m, 2H), 7.66 (d,  $J = 7.6$  Hz, 1H), 7.81 (d,  $J = 7.2$  Hz, 1H), 11.43 (br s, 1H); <sup>13</sup>C NMR (DMSO-*d*<sub>6</sub>, 100 MHz)  $\delta$ : 11.3, 27.4, 49.6, 70.7, 72.7, 109.9, 125.4, 126.5, 127.1, 128.9, 130.3, 131.6, 134.4, 144.1, 144.9, 155.4, 166.4, 173.7, 200.0; HRMS (ESI-TOF) *m/z*: Calcd. for C<sub>29</sub>H<sub>21</sub>N<sub>5</sub>NaO<sub>5</sub>S [M+Na]<sup>+</sup>: 574.1156; Found: 574.1155.

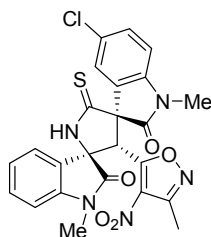

**3ae**: White solid, m.p. 158.9-160.7 °C; Yield 90%; 83% ee, >20:1 dr,  $[\alpha]_{\text{D}}^{20} = 216.00$  (c 0.33, CH<sub>2</sub>Cl<sub>2</sub>); The ee was determined by HPLC analysis using a Chiralpak IF column (93/7 hexane/*i*-PrOH; flow rate: 1.0 mL/min;  $\lambda = 254$  nm;  $\tau_{\text{major}} = 23.77$  min;  $\tau_{\text{minor}} = 31.83$  min); <sup>1</sup>H NMR (DMSO-*d*<sub>6</sub>, 400 MHz)  $\delta$ : 2.10 (s, 3H), 3.10 (s, 3H), 3.11 (s, 3H), 5.86 (s, 1H), 7.00-7.06 (m, 2H), 7.16-7.20 (m, 1H), 7.36-7.42 (m, 2H), 7.56 (s, 1H), 7.65 (d,  $J = 7.6$  Hz, 1H), 11.43 (br s, 1H); <sup>13</sup>C NMR (DMSO-*d*<sub>6</sub>, 100 MHz)  $\delta$ : 11.3, 27.4, 27.7, 49.4, 70.5, 72.7, 110.0, 111.1, 123.3, 124.9, 126.2, 126.5, 126.7, 129.6, 144.0, 144.3, 155.5, 165.9, 173.2, 173.7, 199.4; HRMS (ESI-TOF) *m/z*: Calcd. for C<sub>24</sub>H<sub>18</sub>ClN<sub>5</sub>NaO<sub>5</sub>S [M+Na]<sup>+</sup>: 546.0609; Found: 546.0607.

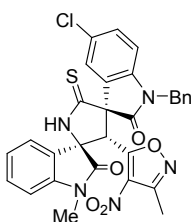

**3af**: White solid, m.p. 119.6-121.3 °C; Yield 90%; 80% ee, >20:1 dr,  $[\alpha]_{\text{D}}^{20} = 137.34$  (c 0.37, CH<sub>2</sub>Cl<sub>2</sub>); The ee was determined by HPLC analysis using a Chiralpak IF column (80/20 hexane/*i*-PrOH; flow rate: 1.0 mL/min;  $\lambda = 254$  nm;  $\tau_{\text{major}} = 23.75$  min;  $\tau_{\text{minor}} = 29.04$  min); <sup>1</sup>H NMR (DMSO-*d*<sub>6</sub>, 400 MHz)  $\delta$ : 2.11 (s, 3H), 4.73 (d,  $J = 16.4$  Hz, 1H), 5.04 (d,  $J = 16.0$  Hz, 1H), 5.98 (s, 1H), 6.82 (d,  $J = 8.8$  Hz, 1H), 7.03 (d,  $J = 7.6$  Hz, 1H), 7.17-7.28 (m, 4H), 7.30-7.41 (m, 4H), 7.62 (d,  $J = 2.0$  Hz, 1H), 7.69 (d,  $J = 7.6$  Hz, 1H); <sup>13</sup>C NMR (DMSO-*d*<sub>6</sub>, 100 MHz)  $\delta$ : 11.4, 27.4, 44.1, 49.6, 70.6, 72.8, 110.0, 111.8, 123.4, 124.7, 126.9, 127.6, 129.0, 129.7, 131.9, 135.8, 143.2, 144.1, 155.5, 165.7, 173.5, 173.6, 199.2; HRMS (ESI-TOF) *m/z*: Calcd. for C<sub>30</sub>H<sub>22</sub>ClN<sub>5</sub>NaO<sub>5</sub>S [M+Na]<sup>+</sup>: 622.0922; Found: 622.0927.

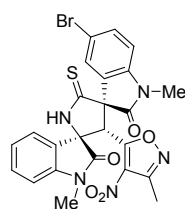

**3ag**: White solid, m.p. 252.2-254.0 °C; Yield 93%; 75% ee, >20:1 dr,  $[\alpha]_{\text{D}}^{20} = 237.05$  (c 0.24, CH<sub>2</sub>Cl<sub>2</sub>); The ee was determined by HPLC analysis using a Chiralpak IC column (85/15 hexane/*i*-PrOH; flow rate: 1.0 mL/min;  $\lambda = 254$  nm;  $\tau_{\text{major}} = 18.57$  min;  $\tau_{\text{minor}} = 37.38$  min); <sup>1</sup>H NMR (DMSO-*d*<sub>6</sub>, 400 MHz)  $\delta$ : 2.10 (s, 3H), 3.10 (s, 3H), 3.11 (s, 3H), 5.86 (s, 1H), 6.99-7.03 (m, 2H), 7.16-7.20 (m, 1H), 7.36-7.40 (m, 1H), 7.52-7.55 (m, 1H), 7.60 (d,  $J = 7.2$  Hz, 1H), 7.66 (s, 1H), 11.43 (br s, 1H); <sup>13</sup>C NMR (DMSO-*d*<sub>6</sub>, 100 MHz)  $\delta$ : 11.3, 27.4, 27.6, 49.4, 70.5, 72.7, 110.0, 111.7, 114.2, 123.3, 124.9, 126.4, 128.8, 129.9, 133.2, 144.1, 144.7, 155.5, 165.9, 173.1, 173.6, 199.4; HRMS (ESI-TOF) *m/z*: Calcd. for C<sub>24</sub>H<sub>18</sub>BrN<sub>5</sub>NaO<sub>5</sub>S [M+Na]<sup>+</sup>: 590.0104; Found: 590.0109.

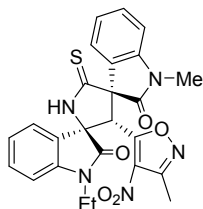

**3ba**: White solid, m.p. 213.6-215.2 °C; Yield 90%; 87% ee, >20:1 dr,  $[\alpha]_{\text{D}}^{20} = 98.63$  (c 0.39, CH<sub>2</sub>Cl<sub>2</sub>); The ee was determined by HPLC analysis using a Chiralpak IE column (85/15 hexane/*i*-PrOH; flow rate: 1.0 mL/min;  $\lambda = 254$  nm;  $\tau_{\text{major}} = 33.76$  min;  $\tau_{\text{minor}} = 29.77$  min); <sup>1</sup>H NMR (DMSO-*d*<sub>6</sub>, 500 MHz)  $\delta$ : 1.09-1.12 (m, 3H), 2.11 (s, 3H), 3.14 (s, 3H), 3.64-3.74 (m, 2H), 5.96 (s,

1H), 7.02 (d,  $J = 8.0$  Hz, 1H), 7.07 (d,  $J = 8.0$  Hz, 1H), 7.13-7.19 (m, 2H), 7.34-7.41 (m, 2H), 7.71 (d,  $J = 8.0$  Hz, 1H), 7.77 (d,  $J = 7.5$  Hz, 1H), 11.39 (br s, 1H);  $^{13}\text{C}$  NMR (DMSO- $d_6$ , 125 MHz)  $\delta$ : 10.8, 12.0, 27.0, 34.9, 54.9, 70.0, 72.1, 109.0, 109.4, 122.5, 122.7, 124.6, 126.0, 127.4, 129.8, 131.2, 142.5, 144.6, 154.9, 165.4, 173.0, 199.8; HRMS (ESI-TOF)  $m/z$ : Calcd. for  $\text{C}_{25}\text{H}_{21}\text{N}_5\text{NaO}_5\text{S}$   $[\text{M}+\text{Na}]^+$ : 526.1156; Found: 526.1158.

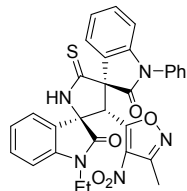

**3bd**: White solid, m.p. 223.3-225.4 °C; Yield 91%; 94% ee, >20:1 dr,  $[\alpha]_{\text{D}}^{20} = 142.01$  (c 0.20,  $\text{CH}_2\text{Cl}_2$ ); The ee was determined by HPLC analysis using a Chiralpak IF column (90/10 hexane/*i*-PrOH; flow rate: 1.0 mL/min;  $\lambda = 254$  nm;  $\tau_{\text{major}} = 23.40$  min;  $\tau_{\text{minor}} = 14.71$  min);  $^1\text{H}$  NMR (DMSO- $d_6$ , 500 MHz)  $\delta$ : 1.15-1.18 (m, 3H), 2.19 (s, 3H), 3.73-3.78 (m, 2H), 6.07 (s, 1H), 6.76 (d,  $J = 8.0$  Hz, 1H), 7.14 (d,  $J = 8.0$  Hz, 1H), 7.20-7.27 (m, 2H), 7.31-7.34 (m, 1H), 7.44-7.48 (m, 3H), 7.51-7.54 (m, 1H), 7.62-7.66 (m, 2H), 7.77 (d,  $J = 8.0$  Hz, 1H), 7.87 (d,  $J = 7.5$  Hz, 1H), 11.54 (br s, 1H);  $^{13}\text{C}$  NMR (DMSO- $d_6$ , 125 MHz)  $\delta$ : 10.9, 12.1, 35.0, 49.0, 70.2, 72.2, 109.4, 109.5, 122.7, 125.0, 126.6, 127.0, 128.5, 129.7, 134.0, 142.5, 144.5, 155.0, 165.8, 172.7, 172.9, 199.5; HRMS (ESI-TOF)  $m/z$ : Calcd. for  $\text{C}_{30}\text{H}_{23}\text{N}_5\text{NaO}_5\text{S}$   $[\text{M}+\text{Na}]^+$ : 588.1312; Found: 588.1315.

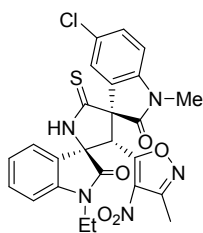

**3be**: White solid, m.p. 164.8-166.2 °C; Yield 94%; 79% ee, >20:1 dr,  $[\alpha]_{\text{D}}^{20} = 206.38$  (c 0.26,  $\text{CH}_2\text{Cl}_2$ ); The ee was determined by HPLC analysis using a Chiralpak IF column (55/45 hexane/*i*-PrOH; flow rate: 1.0 mL/min;  $\lambda = 254$  nm;  $\tau_{\text{major}} = 33.77$  min;  $\tau_{\text{minor}} = 60.19$  min);  $^1\text{H}$  NMR (DMSO- $d_6$ , 500 MHz)  $\delta$ : 1.08-1.12 (m, 3H), 2.14 (s, 3H), 3.15 (s, 3H), 3.64-3.74 (m, 2H), 5.94 (s, 1H), 7.06-7.10 (m, 2H), 7.15-7.20 (m, 1H), 7.37-7.41 (m, 1H), 7.44-7.46 (m, 1H), 7.63-7.66 (m, 2H), 11.48 (br s, 1H);  $^{13}\text{C}$  NMR (DMSO- $d_6$ , 125 MHz)  $\delta$ : 11.3, 12.4, 27.6, 35.4, 49.3, 70.5, 72.7, 110.0, 111.1, 124.9, 126.3, 126.6, 129.6, 130.3, 131.7, 142.9, 144.3, 155.4, 165.8, 173.1, 173.3, 199.5, 218.0; HRMS (ESI-TOF)  $m/z$ : Calcd. for  $\text{C}_{25}\text{H}_{20}\text{ClN}_5\text{NaO}_5\text{S}$   $[\text{M}+\text{Na}]^+$ : 560.0766; Found:

560.0769.

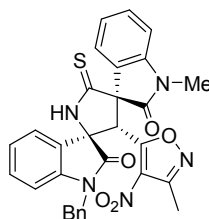

**3ca**: White solid, m.p. 126.5-128.2 °C; Yield 93%; 77% ee, 15:1 dr,  $[\alpha]_D^{20} = 145.20$  (c 0.27, CH<sub>2</sub>Cl<sub>2</sub>); The ee was determined by HPLC analysis using a Chiralpak IC column (90/10 hexane/*i*-PrOH; flow rate: 1.0 mL/min;  $\lambda = 254$  nm;  $\tau_{\text{major}} = 17.68$  min;  $\tau_{\text{minor}} = 34.33$  min); <sup>1</sup>H NMR (CDCl<sub>3</sub>, 400 MHz)  $\delta$ : 2.10 (s, 3H), 3.17 (s, 3H), 4.79 (d,  $J = 15.6$  Hz, 1H), 4.89 (d,  $J = 15.6$  Hz, 1H), 6.17 (s, 1H), 6.68 (d,  $J = 8.0$  Hz, 1H), 6.76 (d,  $J = 7.6$  Hz, 1H), 7.02-7.11 (m, 2H), 7.15-7.20 (m, 6H), 7.24-7.28 (m, 1H), 7.52-7.54 (m, 1H), 7.64-7.66 (m, 1H), 8.73 (br s, 1H); <sup>13</sup>C NMR (CDCl<sub>3</sub>, 100 MHz)  $\delta$ : 10.3, 26.3, 43.8, 49.0, 68.9, 70.9, 107.9, 109.2, 121.9, 122.3, 126.5, 126.9, 127.9, 129.3, 134.0, 141.6, 143.8, 154.0, 164.4, 172.3, 172.8, 200.1; HRMS (ESI-TOF) *m/z*: Calcd. for C<sub>30</sub>H<sub>23</sub>N<sub>5</sub>NaO<sub>5</sub>S [M+Na]<sup>+</sup>: 588.1312; Found: 588.1312.

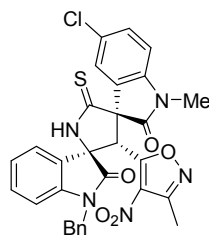

**3ce**: White solid, m.p. 186.7-188.1 °C; Yield 92%; 91% ee, 12:1 dr,  $[\alpha]_D^{20} = 220.92$  (c 0.29, CH<sub>2</sub>Cl<sub>2</sub>); The ee was determined by HPLC analysis using a Chiralpak IC column (75/25 hexane/*i*-PrOH; flow rate: 1.0 mL/min;  $\lambda = 254$  nm;  $\tau_{\text{major}} = 18.71$  min;  $\tau_{\text{minor}} = 46.66$  min); <sup>1</sup>H NMR (CDCl<sub>3</sub>, 400 MHz)  $\delta$ : 2.13 (s, 3H), 3.13 (s, 3H), 4.78 (d,  $J = 15.6$  Hz, 1H), 4.87 (d,  $J = 15.6$  Hz, 1H), 6.15 (s, 1H), 6.67-6.71 (m, 1H), 7.05-7.09 (m, 1H), 7.14-7.25 (m, 7H), 7.50-7.52 (m, 1H), 7.57 (d,  $J = 7.6$  Hz, 1H), 8.83 (br s, 1H); <sup>13</sup>C NMR (CDCl<sub>3</sub>, 100 MHz)  $\delta$ : 10.3, 26.5, 43.9, 48.7, 68.8, 71.0, 108.8, 109.3, 125.4, 126.5, 126.9, 127.1, 127.9, 129.3, 141.7, 142.4, 154.1, 164.1, 171.9, 172.7, 199.2; HRMS (ESI-TOF) *m/z*: Calcd. for C<sub>30</sub>H<sub>22</sub>ClN<sub>5</sub>NaO<sub>5</sub>S [M+Na]<sup>+</sup>: 622.0922; Found: 622.0925.

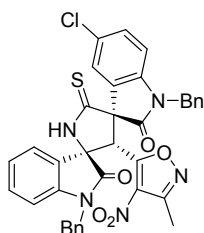

**3cf**: White solid, m.p. 200.1-201.7 °C; Yield 94%; 76% ee, >20:1 dr,  $[\alpha]_D^{20} = 293.56$  (c 0.15, CH<sub>2</sub>Cl<sub>2</sub>); The ee was determined by HPLC analysis using a Chiralpak IC column (65/35 hexane/*i*-PrOH; flow rate: 1.0 mL/min;  $\lambda = 254$  nm;  $\tau_{\text{major}} = 38.46$  min;  $\tau_{\text{minor}} = 25.56$  min); <sup>1</sup>H NMR (DMSO-*d*<sub>6</sub>, 400 MHz)  $\delta$ : 2.13 (s, 3H), 4.73-4.83 (m, 2H), 4.94-5.08 (m, 2H), 6.10 (s, 1H), 6.83-6.88 (m, 2H), 7.18-7.36 (m, 13H), 7.66 (s, 1H), 7.75 (d,  $J = 7.2$  Hz, 1H), 11.79 (br s, 1H); <sup>13</sup>C NMR (DMSO-*d*<sub>6</sub>, 100 MHz)  $\delta$ : 11.4, 44.0, 49.9, 70.7, 73.0, 110.7, 111.8, 124.9, 127.0, 127.6, 127.7, 129.0, 129.1, 135.8, 135.9, 142.9, 143.3, 155.6, 165.4, 173.5, 174.0, 199.5; HRMS (ESI-TOF)  $m/z$ : Calcd. for C<sub>36</sub>H<sub>26</sub>ClN<sub>5</sub>NaO<sub>5</sub>S [M+Na]<sup>+</sup>: 698.1235; Found: 698.1242.

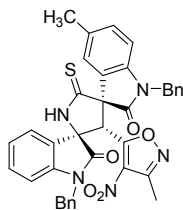

**3ch**: White solid, m.p. 126.5-127.8 °C; Yield 96%; 70% ee, >20:1 dr,  $[\alpha]_D^{20} = 54.69$  (c 0.55, CH<sub>2</sub>Cl<sub>2</sub>); The ee was determined by HPLC analysis using a Chiralpak IC column (65/35 hexane/*i*-PrOH; flow rate: 1.0 mL/min;  $\lambda = 254$  nm;  $\tau_{\text{major}} = 77.23$  min;  $\tau_{\text{minor}} = 41.94$  min); <sup>1</sup>H NMR (DMSO-*d*<sub>6</sub>, 400 MHz)  $\delta$ : 2.10 (s, 3H), 2.29 (s, 3H), 4.72-4.84 (m, 2H), 4.93-5.01 (m, 2H), 6.12 (s, 1H), 6.67 (d,  $J = 8.0$  Hz, 1H), 6.87 (d,  $J = 8.0$  Hz, 1H), 7.01 (d,  $J = 7.6$  Hz, 1H), 7.18-7.33 (m, 12H), 7.49 (s, 1H), 7.85 (d,  $J = 6.4$  Hz, 1H), 11.69 (br s, 1H); <sup>13</sup>C NMR (DMSO-*d*<sub>6</sub>, 100 MHz)  $\delta$ : 11.4, 21.3, 43.9, 50.1, 70.8, 72.8, 110.1, 110.7, 127.5, 127.6, 127.7, 129.0, 129.1, 136.0, 136.2, 141.8, 142.9, 155.4, 165.5, 173.8, 174.2, 200.4; HRMS (ESI-TOF)  $m/z$ : Calcd. for C<sub>37</sub>H<sub>29</sub>N<sub>5</sub>NaO<sub>5</sub>S [M+Na]<sup>+</sup>: 678.1782; Found: 678.1780.

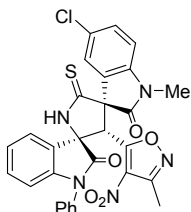

**3de**: White solid, m.p. 140.8-142.1 °C; Yield 94%; 77% ee, >20:1 dr,  $[\alpha]_D^{20} = 296.52$  (c 0.12,



CH<sub>2</sub>Cl<sub>2</sub>); The ee was determined by HPLC analysis using a Chiralpak IC column (82/18 hexane/*i*-PrOH; flow rate: 1.0 mL/min;  $\lambda = 254$  nm;  $\tau_{\text{major}} = 36.02$  min;  $\tau_{\text{minor}} = 14.39$  min); <sup>1</sup>H NMR (DMSO-*d*<sub>6</sub>, 400 MHz)  $\delta$ : 2.14 (s, 3H), 3.13 (s, 3H), 5.97 (s, 1H), 6.68 (d,  $J = 8.0$  Hz, 1H), 7.07-7.09 (m, 1H), 7.20-7.23 (m, 1H), 7.29-7.33 (m, 1H), 7.36 (d,  $J = 6.8$  Hz, 2H), 7.43-7.50 (m, 2H), 7.58-7.61 (m, 2H), 7.67 (s, 1H), 7.72 (d,  $J = 7.6$  Hz, 1H), 11.53 (br s, 1H); <sup>13</sup>C NMR (DMSO-*d*<sub>6</sub>, 100 MHz)  $\delta$ : 11.3, 27.7, 49.6, 70.6, 72.9, 110.3, 111.2, 124.5, 126.7, 127.0, 129.9, 130.4, 134.1, 143.9, 144.3, 155.6, 166.2, 173.2, 173.3, 199.5; HRMS (ESI-TOF)  $m/z$ : Calcd. for C<sub>29</sub>H<sub>20</sub>ClN<sub>5</sub>NaO<sub>5</sub>S [M+Na]<sup>+</sup>: 608.0766; Found: 608.0769.

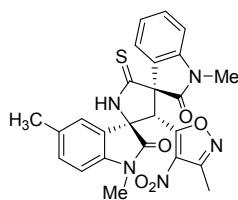

**3ea**: White solid, m.p. 249.8-251.6 °C; Yield 95%; 96% ee, >20:1 dr,  $[\alpha]_{\text{D}}^{20} = 93.77$  (c 0.41, CH<sub>2</sub>Cl<sub>2</sub>); The ee was determined by HPLC analysis using a Chiralpak IF column (98/2 hexane/*i*-PrOH; flow rate: 1.0 mL/min;  $\lambda = 254$  nm;  $\tau_{\text{major}} = 24.56$  min;  $\tau_{\text{minor}} = 16.83$  min); <sup>1</sup>H NMR (DMSO-*d*<sub>6</sub>, 500 MHz)  $\delta$ : 2.11 (s, 3H), 3.11 (s, 3H), 3.14 (s, 3H), 5.91 (s, 1H), 6.93 (d,  $J = 8.0$  Hz, 1H), 7.01 (d,  $J = 7.5$  Hz, 1H), 7.13-7.17 (m, 1H), 7.21-7.23 (m, 1H), 7.32-7.36 (m, 1H), 7.53 (s, 1H), 7.65 (d,  $J = 7.5$  Hz, 1H), 11.34 (br s, 1H); <sup>13</sup>C NMR (DMSO-*d*<sub>6</sub>, 125 MHz)  $\delta$ : 10.8, 20.7, 26.9, 27.0, 49.1, 70.0, 72.2, 82.3, 109.0, 109.2, 122.5, 124.8, 126.7, 127.3, 129.8, 131.8, 141.2, 144.6, 154.9, 165.5, 173.1, 173.2, 187.3, 199.7, 217.3; HRMS (ESI-TOF)  $m/z$ : Calcd. for C<sub>25</sub>H<sub>21</sub>N<sub>5</sub>NaO<sub>5</sub>S [M+Na]<sup>+</sup>: 526.1156; Found: 526.1162.

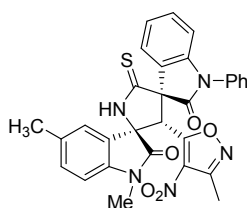

**3ed**: White solid, m.p. 125.5-127.2 °C; Yield 94%; 92% ee, >20:1 dr,  $[\alpha]_{\text{D}}^{20} = 170.00$  (c 0.19, CH<sub>2</sub>Cl<sub>2</sub>); The ee was determined by HPLC analysis using a Chiralpak IF column (98/2 hexane/*i*-PrOH; flow rate: 1.0 mL/min;  $\lambda = 254$  nm;  $\tau_{\text{major}} = 42.45$  min;  $\tau_{\text{minor}} = 15.71$  min); <sup>1</sup>H NMR (DMSO-*d*<sub>6</sub>, 500 MHz)  $\delta$ : 2.19 (s, 3H), 2.46 (s, 3H), 3.16 (s, 3H), 6.02 (s, 1H), 6.75 (d,  $J = 7.5$  Hz, 1H), 7.00 (d,  $J = 8.0$  Hz, 1H), 7.21-7.24 (m, 1H), 7.28-7.33 (m, 2H), 7.44 (d,  $J = 7.5$  Hz, 2H), 7.52-7.55 (m, 1H), 7.63-7.66 (m, 3H), 7.71 (d,  $J = 7.5$  Hz, 1H), 11.47 (br s, 1H); <sup>13</sup>C NMR

(DMSO-*d*<sub>6</sub>, 125 MHz)  $\delta$ : 11.3, 21.2, 27.4, 49.6, 70.6, 72.7, 109.7, 109.8, 125.5, 127.0, 127.3, 130.2, 130.3, 131.8, 132.3, 134.4, 141.7, 144.9, 155.4, 166.3, 173.1, 173.6, 199.7, 218.0; HRMS (ESI-TOF) *m/z*: Calcd. for C<sub>30</sub>H<sub>23</sub>N<sub>5</sub>NaO<sub>5</sub>S [M+Na]<sup>+</sup>: 588.1312; Found: 588.1317.

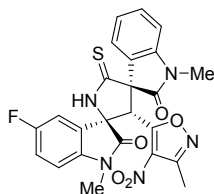

**3fa**: White solid, m.p. 125.2-127.0 °C; Yield 92%; 83% ee, >20:1 dr,  $[\alpha]_D^{20} = 151.30$  (c 0.19, CH<sub>2</sub>Cl<sub>2</sub>); The ee was determined by HPLC analysis using a Chiralpak IE column (80/20 hexane/*i*-PrOH; flow rate: 1.0 mL/min;  $\lambda = 254$  nm;  $\tau_{\text{major}} = 19.21$  min;  $\tau_{\text{minor}} = 13.82$  min); <sup>1</sup>H NMR (DMSO-*d*<sub>6</sub>, 500 MHz)  $\delta$ : 2.12 (s, 3H), 3.13 (s, 3H), 3.14 (s, 3H), 5.91 (s, 1H), 7.00 (d, *J* = 8.0 Hz, 1H), 7.07-7.09 (m, 1H), 7.12-7.15 (m, 1H), 7.29-7.35 (m, 2H), 7.61-7.65 (m, 2H), 11.37 (br s, 1H); <sup>13</sup>C NMR (DMSO-*d*<sub>6</sub>, 125 MHz)  $\delta$ : 10.8, 27.0, 27.1, 49.2, 70.0, 72.2, 109.0, 110.5, 114.3 (d, *J*<sub>CF</sub> = 25.0 Hz), 117.6 (d, *J*<sub>CF</sub> = 22.5 Hz), 122.6, 125.8, 126.2, 126.3, 127.1, 129.9, 131.3, 140.0, 144.6, 155.0, 158.3 (d, *J*<sub>CF</sub> = 237.5 Hz), 165.4, 172.9, 173.3, 199.9; HRMS (ESI-TOF) *m/z*: Calcd. for C<sub>24</sub>H<sub>18</sub>FN<sub>5</sub>NaO<sub>5</sub>S [M+Na]<sup>+</sup>: 530.0905; Found: 530.0909.

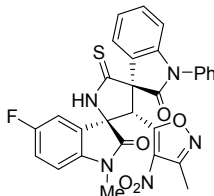

**3fd**: White solid, m.p. 187.8-188.6 °C; Yield 93%; 94% ee, >20:1 dr,  $[\alpha]_D^{20} = 187.10$  (c 0.13, CH<sub>2</sub>Cl<sub>2</sub>); The ee was determined by HPLC analysis using a Chiralpak IC column (85/15 hexane/*i*-PrOH; flow rate: 1.0 mL/min;  $\lambda = 254$  nm;  $\tau_{\text{major}} = 29.02$  min;  $\tau_{\text{minor}} = 20.26$  min); <sup>1</sup>H NMR (DMSO-*d*<sub>6</sub>, 500 MHz)  $\delta$ : 2.21 (s, 3H), 3.19 (s, 3H), 6.01 (s, 1H), 6.73 (d, *J* = 8.0 Hz, 1H), 7.13-7.16 (m, 1H), 7.19-7.22 (m, 1H), 7.29-7.32 (m, 1H), 7.36-7.40 (m, 1H), 7.43 (d, *J* = 7.5 Hz, 2H), 7.51-7.54 (m, 1H), 7.63-7.66 (m, 2H), 7.69-7.74 (m, 2H), 11.50 (br s, 1H); <sup>13</sup>C NMR (DMSO-*d*<sub>6</sub>, 125 MHz)  $\delta$ : 11.2, 27.6, 49.6, 70.6, 72.7, 109.7, 110.9, 114.9 (d, *J*<sub>CF</sub> = 25.0 Hz), 118.1 (d, *J*<sub>CF</sub> = 23.8 Hz), 123.6, 126.5, 126.9, 127.0, 127.2, 128.9, 130.2, 130.4, 131.8, 134.4, 140.5, 144.8, 155.5, 158.8 (d, *J*<sub>CF</sub> = 238.8 Hz), 166.2, 173.0, 173.6, 200.0; HRMS (ESI-TOF) *m/z*: Calcd. for C<sub>29</sub>H<sub>20</sub>FN<sub>5</sub>NaO<sub>5</sub>S [M+Na]<sup>+</sup>: 592.1061; Found: 592.1068.

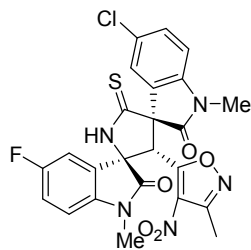

**3fe**: White solid, m.p. 167.7-168.2 °C; Yield 91%; 83% ee, 12:1 dr,  $[\alpha]_D^{20} = 66.02$  (c 0.27, CH<sub>2</sub>Cl<sub>2</sub>); The ee was determined by HPLC analysis using a Chiralpak IF column (60/40 hexane/i-PrOH; flow rate: 1.0 mL/min;  $\lambda = 254$  nm;  $\tau_{\text{major}} = 29.62$  min;  $\tau_{\text{minor}} = 25.50$  min); <sup>1</sup>H NMR (DMSO-*d*<sub>6</sub>, 500 MHz)  $\delta$ : 2.15 (s, 3H), 3.13 (s, 3H), 3.14 (s, 3H), 5.88 (s, 1H), 7.05-7.08 (m, 2H), 7.28-7.32 (m, 1H), 7.42-7.44 (m, 1H), 7.60-7.62 (m, 1H), 7.64 (d,  $J = 2.0$  Hz, 1H), 11.44 (br s, 1H); <sup>13</sup>C NMR (DMSO-*d*<sub>6</sub>, 125 MHz)  $\delta$ : 10.8, 27.1, 27.2, 49.1, 70.0, 72.3, 110.5, 114.2 (d,  $J_{CF} = 26.3$  Hz), 117.6 (d,  $J_{CF} = 22.5$  Hz), 125.9, 126.2, 128.9, 129.8, 139.9, 143.8, 155.1, 158.2 (d,  $J_{CF} = 237.5$  Hz), 165.2, 172.6, 173.1, 199.0; HRMS (ESI-TOF)  $m/z$ : Calcd. for C<sub>24</sub>H<sub>17</sub>ClFN<sub>5</sub>NaO<sub>5</sub>S [M+Na]<sup>+</sup>: 564.0515; Found: 564.0519.

#### 4. One-mmol-scale synthesis of the product **3ab**

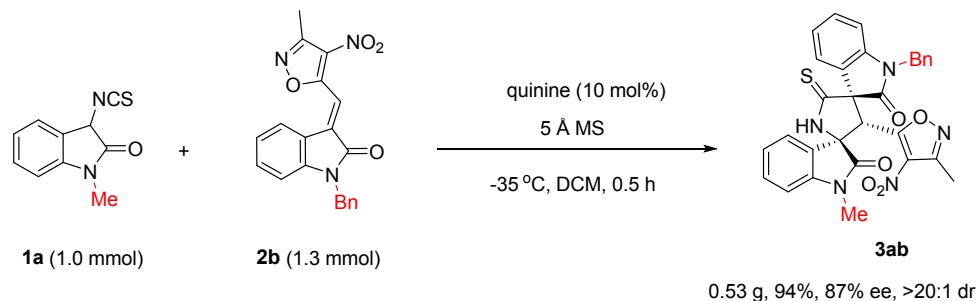

In an ordinary vial equipped with a magnetic stirring bar, the compound **2b** (1.3 mmol, 1.3 equiv.), 5Å molecular sieve (1.0 g) and catalyst quinine (32.4 mg, 10 mmol %, 0.1 mmol) were dissolved in 160.0 mL of freshly distilled DCM at -35 °C, and then 3-isothiocyanato oxindole **1a** (1.0 mmol) was added. After completion of the reaction, as indicated by TLC, the reaction mixture was directly purified by flash chromatography to yield the desired product **3ab** (0.53 g, 94%, 87% ee, >20:1 dr).

## 5. X-Ray crystal data for compounds 3ab and 3ad

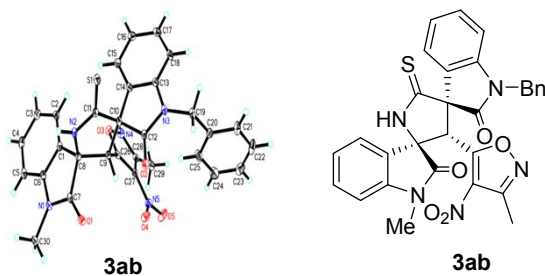

**Table S1 Crystal data and structure refinement for 3ab**

|                                             |                                                                    |
|---------------------------------------------|--------------------------------------------------------------------|
| Identification code                         | <b>3ab</b>                                                         |
| Empirical formula                           | C <sub>34</sub> H <sub>35.51</sub> N <sub>5</sub> O <sub>7</sub> S |
| Formula weight                              | 658.24                                                             |
| Temperature/K                               | 100.01(10)                                                         |
| Crystal system                              | orthorhombic                                                       |
| Space group                                 | P2 <sub>1</sub> 2 <sub>1</sub> 2 <sub>1</sub>                      |
| a/Å, b/Å, c/Å                               | 10.69410(10), 16.3625(2), 18.2683(2)                               |
| α/°, β/°, γ/°                               | 90, 90, 90.                                                        |
| Volume/Å <sup>3</sup>                       | 3196.63(6)                                                         |
| Z                                           | 4                                                                  |
| ρ <sub>calc</sub> /cm <sup>3</sup>          | 1.368                                                              |
| μ/mm <sup>-1</sup>                          | 1.382                                                              |
| F(000)                                      | 1386.0                                                             |
| Crystal size/mm <sup>3</sup>                | 0.14 × 0.13 × 0.12                                                 |
| Radiation                                   | CuKα (λ = 1.54184)                                                 |
| 2θ range for data collection/°              | 7.252 to 147.252                                                   |
| Index ranges                                | -10 ≤ h ≤ 13, -20 ≤ k ≤ 18, -22 ≤ l ≤ 18                           |
| Reflections collected                       | 27624                                                              |
| Independent reflections                     | 6388 [R <sub>int</sub> = 0.0445, R <sub>sigma</sub> = 0.0285]      |
| Data/restraints/parameters                  | 6388/0/440                                                         |
| Goodness-of-fit on F <sup>2</sup>           | 1.042                                                              |
| Final R indexes [I >= 2σ(I)]                | R <sub>1</sub> = 0.0383, wR <sub>2</sub> = 0.1012                  |
| Final R indexes [all data]                  | R <sub>1</sub> = 0.0390, wR <sub>2</sub> = 0.1020                  |
| Largest diff. peak/hole / e Å <sup>-3</sup> | 0.55/-0.37                                                         |
| Flack/Hooft parameter                       | 0.001(8)/-0.003(6)                                                 |

### Crystal structure determination of 3ab

**Crystal Data** for C<sub>34</sub>H<sub>35.5075</sub>N<sub>5</sub>O<sub>7</sub>S (*M* = 658.24 g/mol): orthorhombic, space group P2<sub>1</sub>2<sub>1</sub>2<sub>1</sub> (no. 19), *a* = 10.69410(10) Å, *b* = 16.3625(2) Å, *c* = 18.2683(2) Å, *V* = 3196.63(6) Å<sup>3</sup>, *Z* = 4, *T* = 100.01(10) K, μ(CuKα) = 1.382 mm<sup>-1</sup>, *D*<sub>calc</sub> = 1.368 g/cm<sup>3</sup>, 27624 reflections measured (7.252° ≤ 2θ ≤ 147.252°), 6388 unique (*R*<sub>int</sub> = 0.0445, *R*<sub>sigma</sub> = 0.0285) which were used in all calculations. The final *R*<sub>1</sub> was 0.0383 (*I* > 2σ(*I*)) and *wR*<sub>2</sub> was 0.1020 (all data).

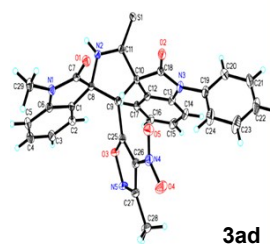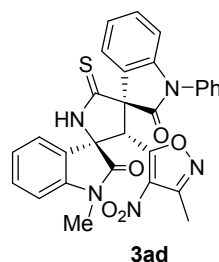

**Table S2 Crystal data and structure refinement for 3ad**

|                                                    |                                                                    |
|----------------------------------------------------|--------------------------------------------------------------------|
| Identification code                                | <b>3ad</b>                                                         |
| Empirical formula                                  | $C_{33}H_{33}N_5O_7S$                                              |
| Formula weight                                     | 643.70                                                             |
| Temperature/K                                      | 100.00(10)                                                         |
| Crystal system                                     | orthorhombic                                                       |
| Space group                                        | $P2_12_12_1$                                                       |
| $a/\text{\AA}$ , $b/\text{\AA}$ , $c/\text{\AA}$   | 11.1703(2), 15.8824(3), 18.1124(3)                                 |
| $\alpha/^\circ$ , $\beta/^\circ$ , $\gamma/^\circ$ | 90, 90, 90.                                                        |
| Volume/ $\text{\AA}^3$                             | 3213.34(10)                                                        |
| Z                                                  | 4                                                                  |
| $\rho_{\text{calc}}/\text{g/cm}^3$                 | 1.331                                                              |
| $\mu/\text{mm}^{-1}$                               | 1.363                                                              |
| F(000)                                             | 1352.0                                                             |
| Crystal size/ $\text{mm}^3$                        | $0.14 \times 0.13 \times 0.12$                                     |
| Radiation                                          | $\text{CuK}\alpha$ ( $\lambda = 1.54184$ )                         |
| $2\theta$ range for data collection/ $^\circ$      | 7.402 to 147.612                                                   |
| Index ranges                                       | $-13 \leq h \leq 13$ , $-19 \leq k \leq 17$ , $-15 \leq l \leq 22$ |
| Reflections collected                              | 18187                                                              |
| Independent reflections                            | 6341 [ $R_{\text{int}} = 0.0323$ , $R_{\text{sigma}} = 0.0302$ ]   |
| Data/restraints/parameters                         | 6341/0/421                                                         |
| Goodness-of-fit on $F^2$                           | 1.048                                                              |
| Final R indexes [ $I \geq 2\sigma(I)$ ]            | $R_1 = 0.0376$ , $wR_2 = 0.0971$                                   |
| Final R indexes [all data]                         | $R_1 = 0.0386$ , $wR_2 = 0.0980$                                   |
| Largest diff. peak/hole / $e \text{\AA}^{-3}$      | 0.26/-0.25                                                         |
| Flack/Hooft parameter                              | 0.006(8)/0.003(7)                                                  |

### Crystal structure determination of 3ad

**Crystal Data** for  $C_{33}H_{33}N_5O_7S$  ( $M = 643.70$  g/mol): orthorhombic, space group  $P2_12_12_1$  (no. 19),  $a = 11.1703(2)$   $\text{\AA}$ ,  $b = 15.8824(3)$   $\text{\AA}$ ,  $c = 18.1124(3)$   $\text{\AA}$ ,  $V = 3213.34(10)$   $\text{\AA}^3$ ,  $Z = 4$ ,  $T = 100.00(10)$  K,  $\mu(\text{CuK}\alpha) = 1.363$   $\text{mm}^{-1}$ ,  $D_{\text{calc}} = 1.331$   $\text{g/cm}^3$ , 18187 reflections measured ( $7.402^\circ \leq 2\theta \leq 147.612^\circ$ ), 6341 unique ( $R_{\text{int}} = 0.0323$ ,  $R_{\text{sigma}} = 0.0302$ ) which were used in all calculations. The final  $R_1$  was 0.0376 ( $I > 2\sigma(I)$ ) and  $wR_2$  was 0.0980 (all data).

## 6. The copies of $^1\text{H}$ NMR, $^{13}\text{C}$ NMR and HPLC spectra for compounds 3

### $^1\text{H}$ and $^{13}\text{C}$ NMR of 3aa

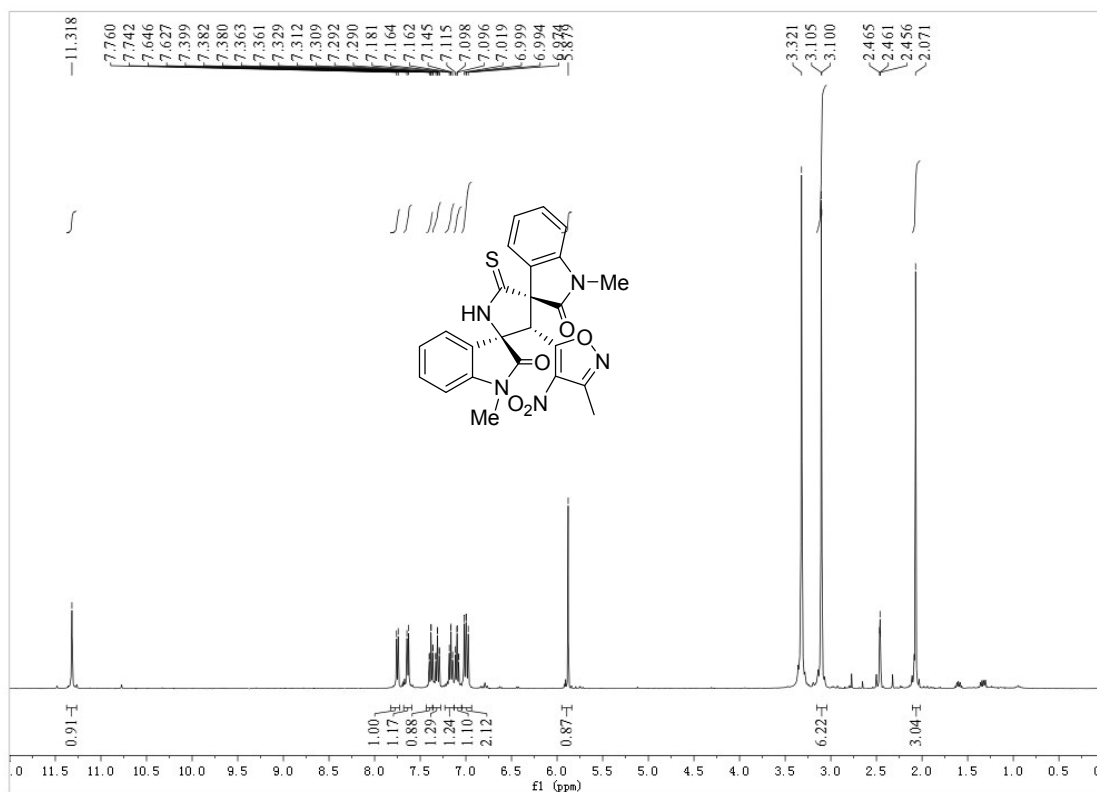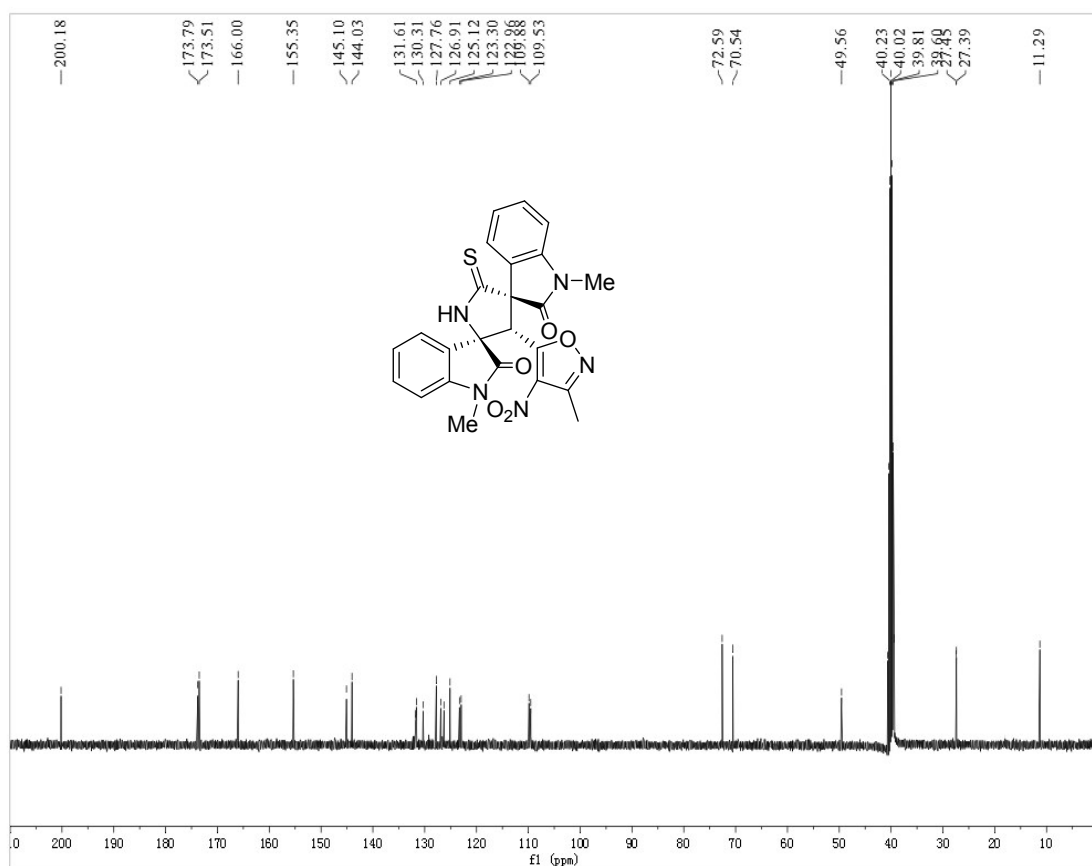

### HPLC of 3aa

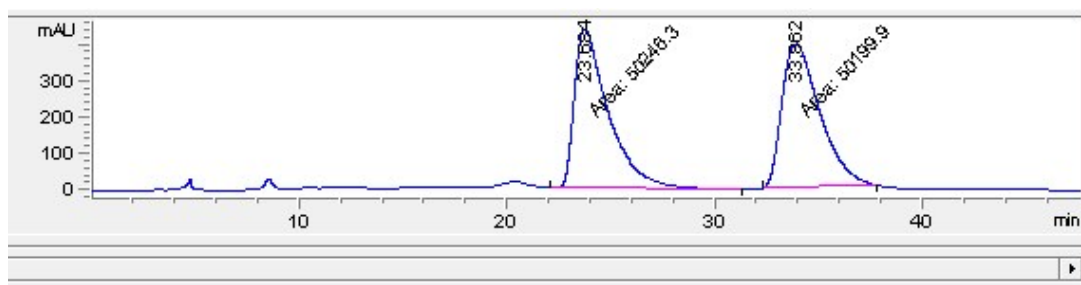

| # | Time   | Area    | Height | Width  | Area%  | Symmetry |
|---|--------|---------|--------|--------|--------|----------|
| 1 | 23.684 | 50246.3 | 441.2  | 1.8979 | 50.023 | 0.409    |
| 2 | 33.862 | 50199.9 | 398.4  | 2.1002 | 49.977 | 0.543    |

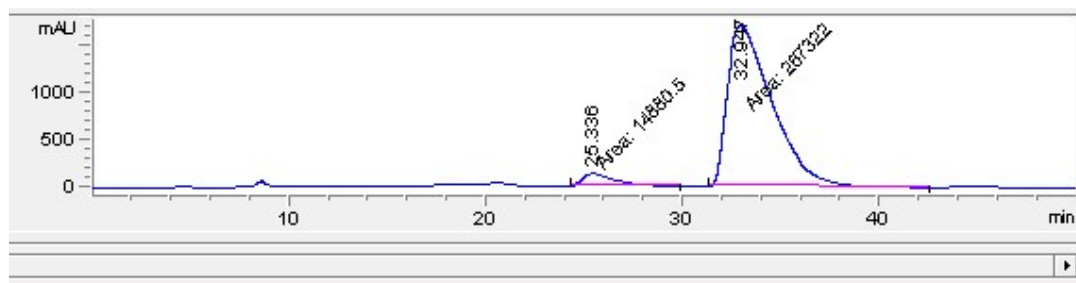

| # | Time   | Area     | Height | Width  | Area%  | Symmetry |
|---|--------|----------|--------|--------|--------|----------|
| 1 | 25.336 | 14880.5  | 129.7  | 1.9119 | 5.273  | 0.399    |
| 2 | 32.947 | 267322.2 | 1685.2 | 2.6439 | 94.727 | 0.444    |

# <sup>1</sup>H and <sup>13</sup>C NMR of 3ab

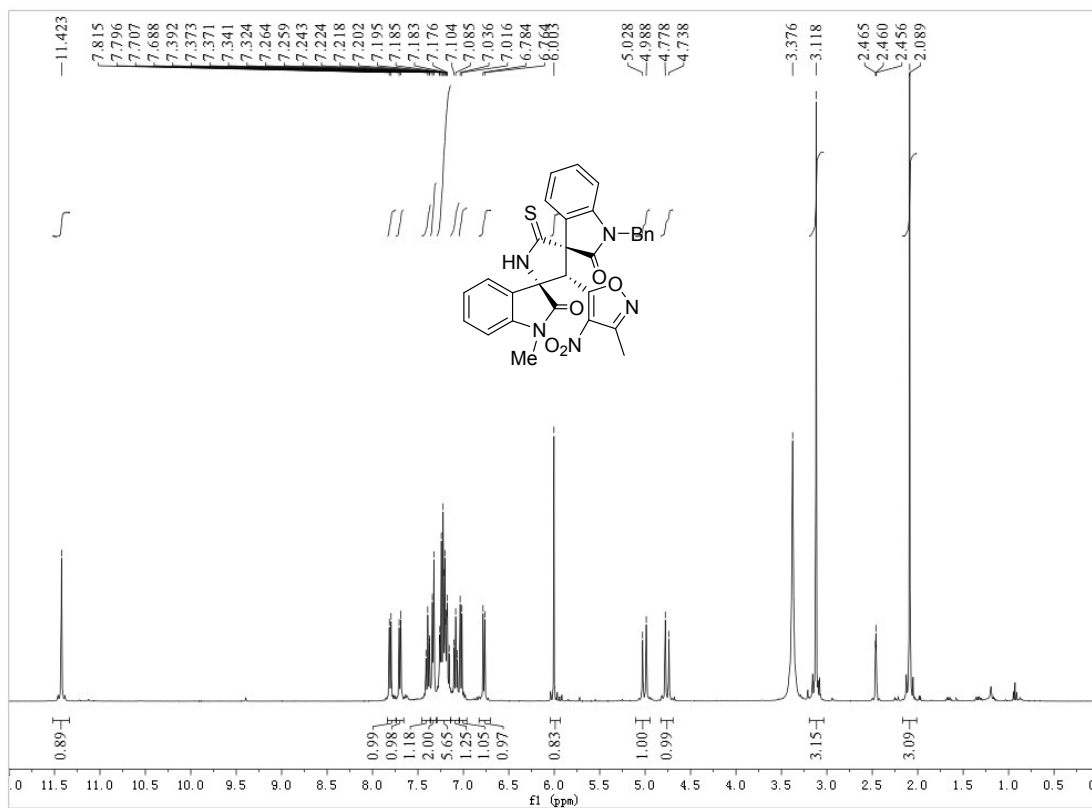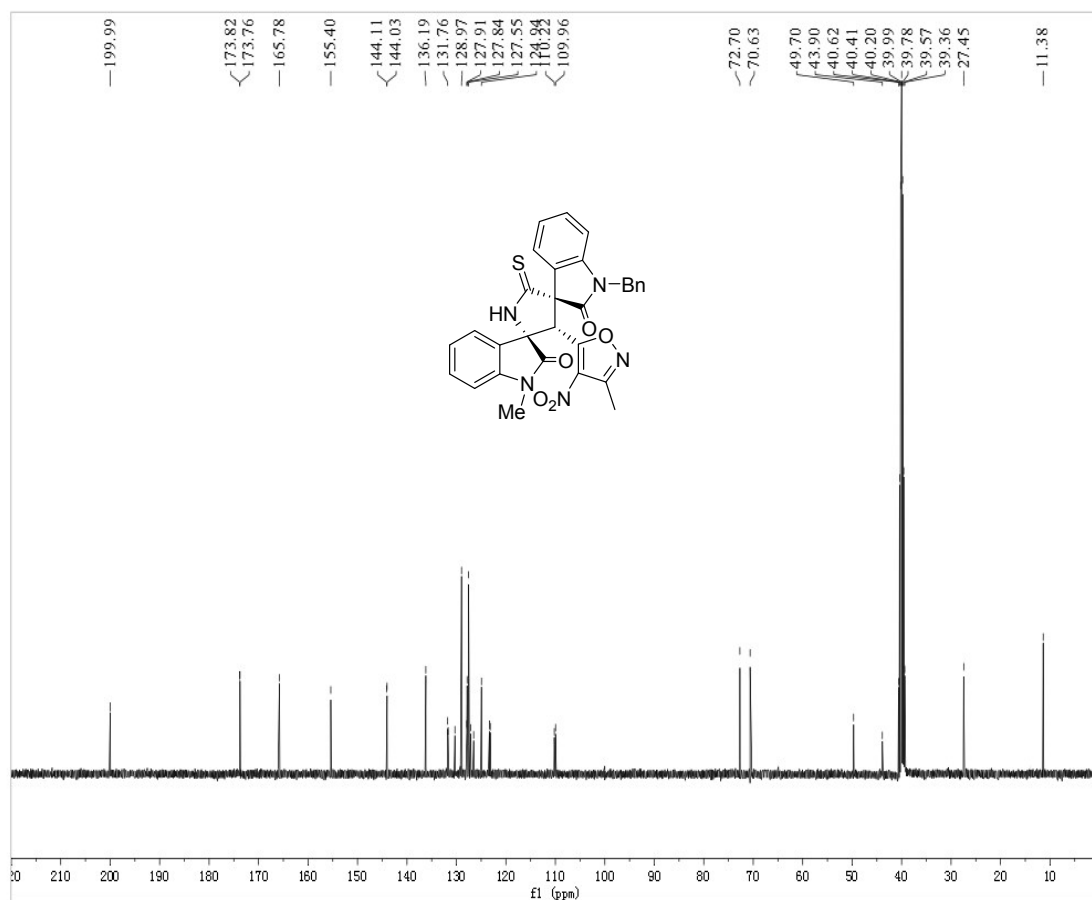



### HPLC of 3ab

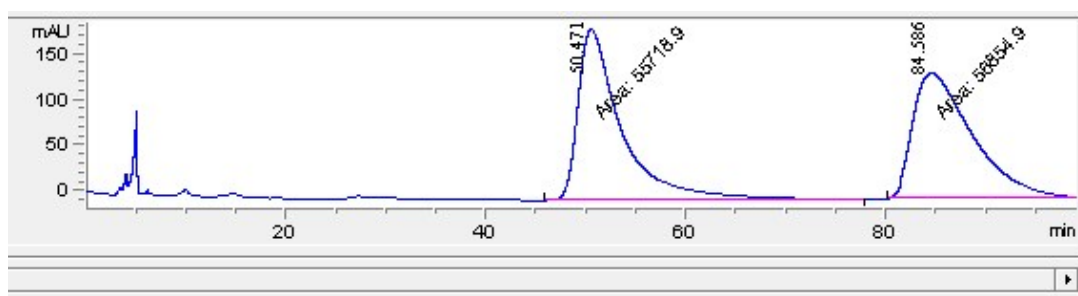

| # | Time   | Area    | Height | Width  | Area%  | Symmetry |
|---|--------|---------|--------|--------|--------|----------|
| 1 | 50.471 | 55718.9 | 185.6  | 5.0047 | 49.495 | 0.419    |
| 2 | 84.586 | 56854.9 | 137.5  | 6.8939 | 50.505 | 0.447    |

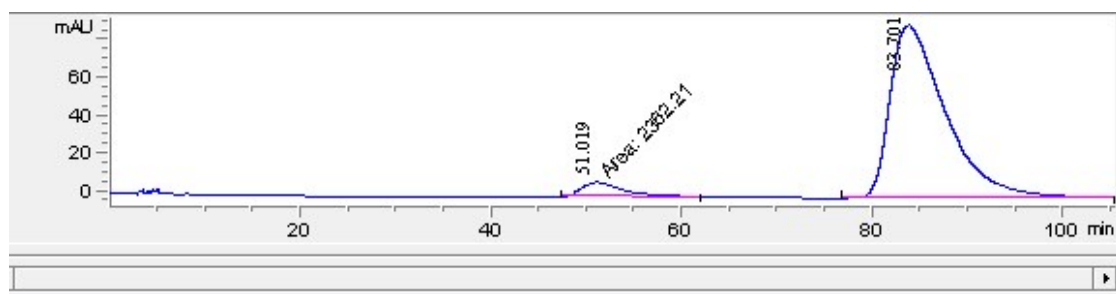

| # | Time   | Area    | Height | Width  | Area%  | Symmetry |
|---|--------|---------|--------|--------|--------|----------|
| 1 | 51.019 | 2362.2  | 7.7    | 5.1241 | 6.036  | 0.51     |
| 2 | 83.701 | 36774.4 | 91.1   | 5.9312 | 93.964 | 0.453    |

**<sup>1</sup>H and <sup>13</sup>C NMR of 3ac**

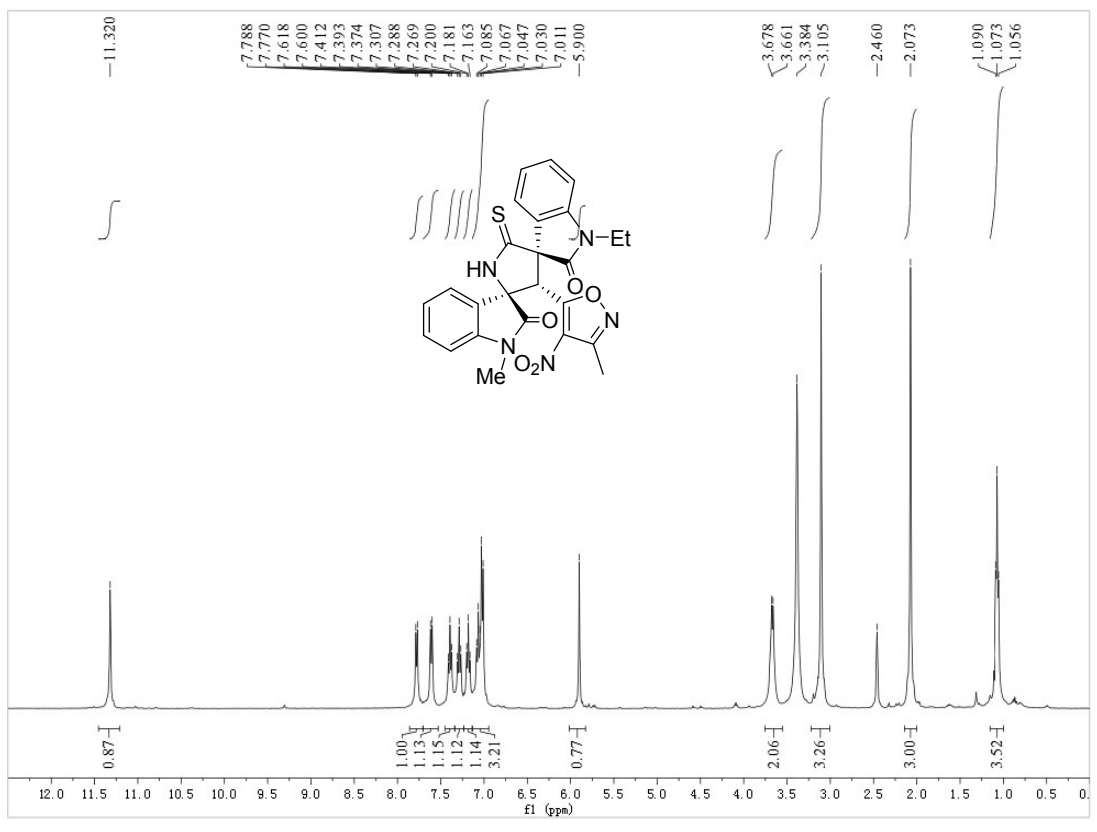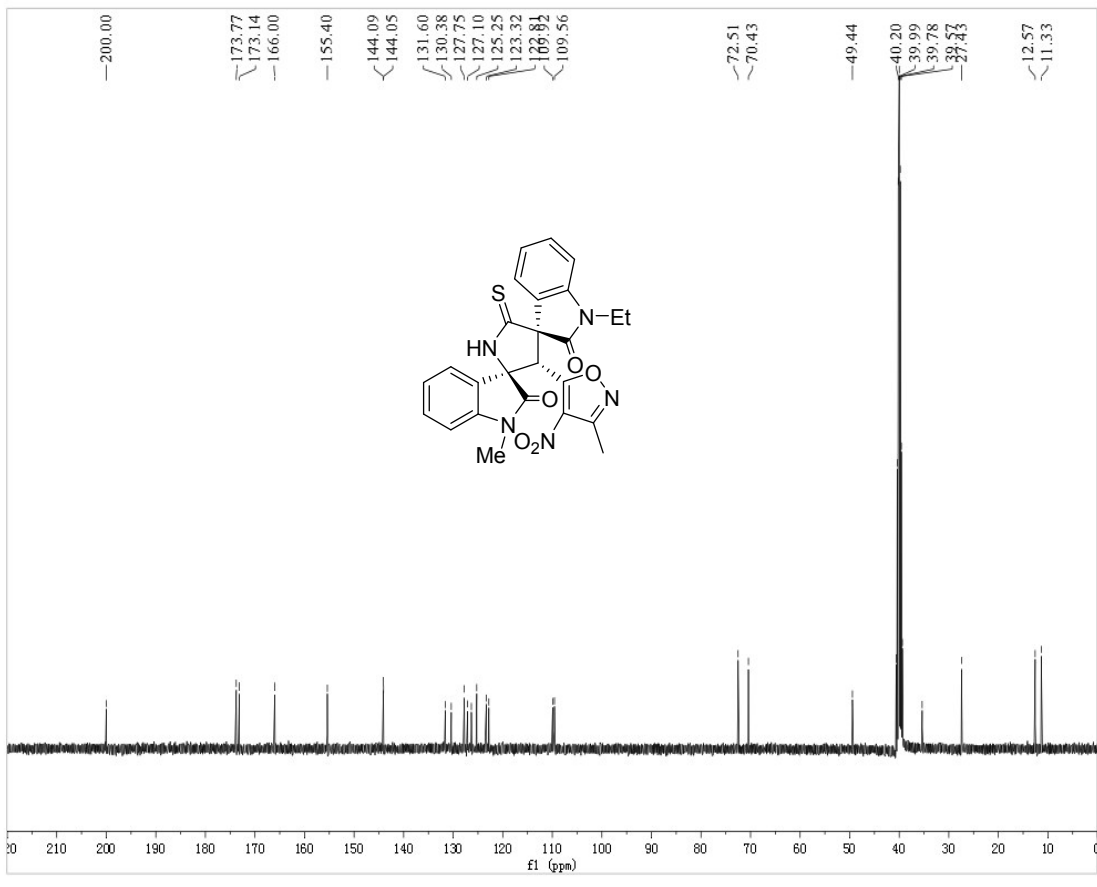

### HPLC of 3ac

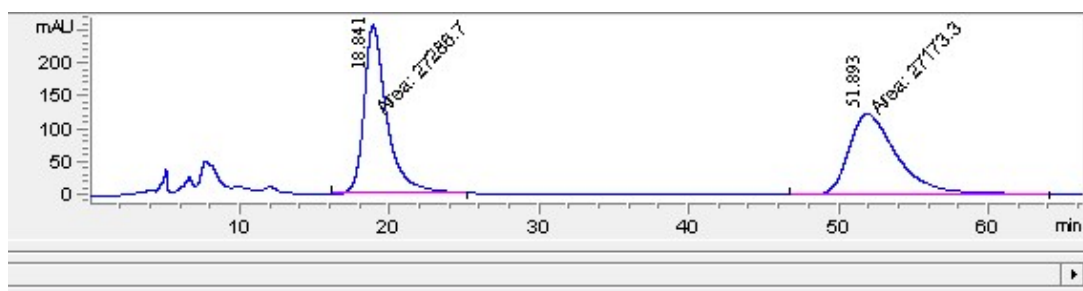

| # | Time   | Area    | Height | Width  | Area%  | Symmetry |
|---|--------|---------|--------|--------|--------|----------|
| 1 | 18.841 | 27286.7 | 256.9  | 1.7703 | 50.104 | 0.618    |
| 2 | 51.893 | 27173.3 | 122    | 3.7135 | 49.896 | 0.588    |

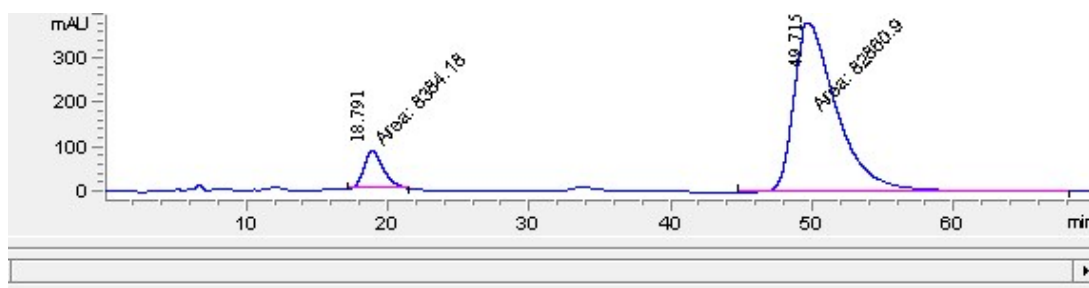

| # | Time   | Area    | Height | Width  | Area%  | Symmetry |
|---|--------|---------|--------|--------|--------|----------|
| 1 | 18.791 | 8384.2  | 86.8   | 1.6093 | 9.189  | 0.728    |
| 2 | 49.715 | 82860.9 | 382.2  | 3.6129 | 90.811 | 0.524    |

# $^1\text{H}$ and $^{13}\text{C}$ NMR of 3ad

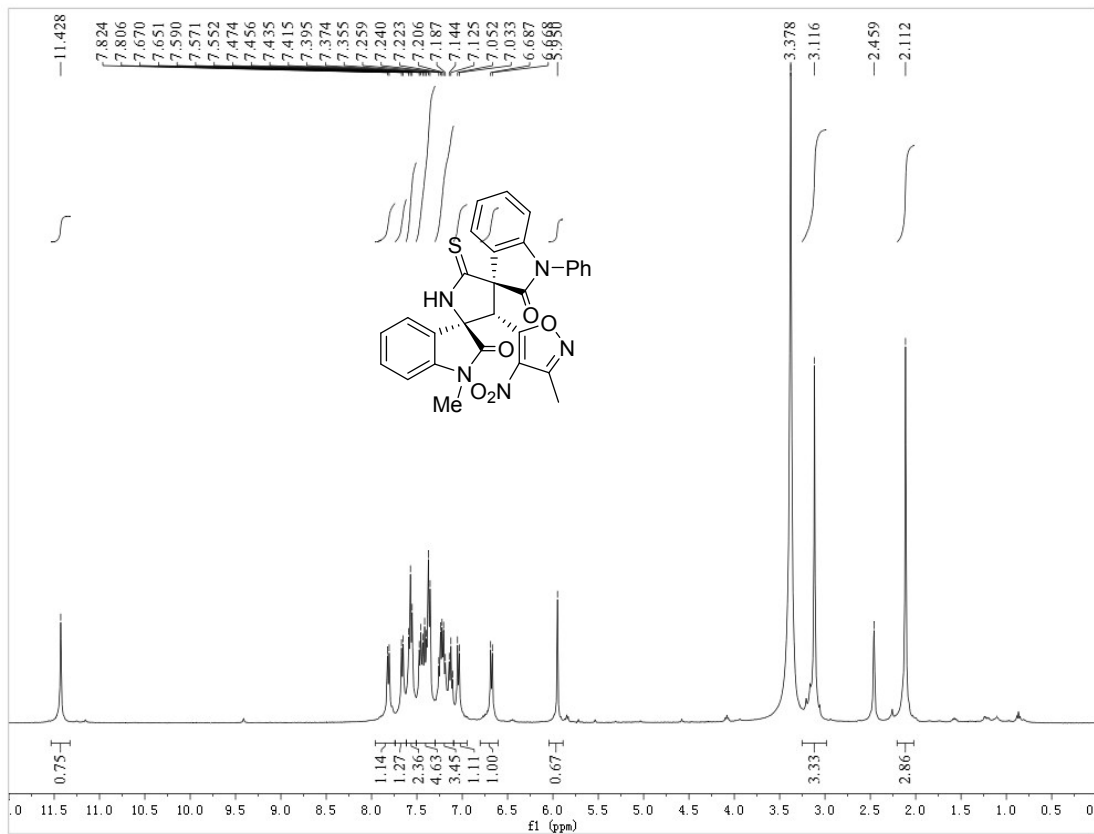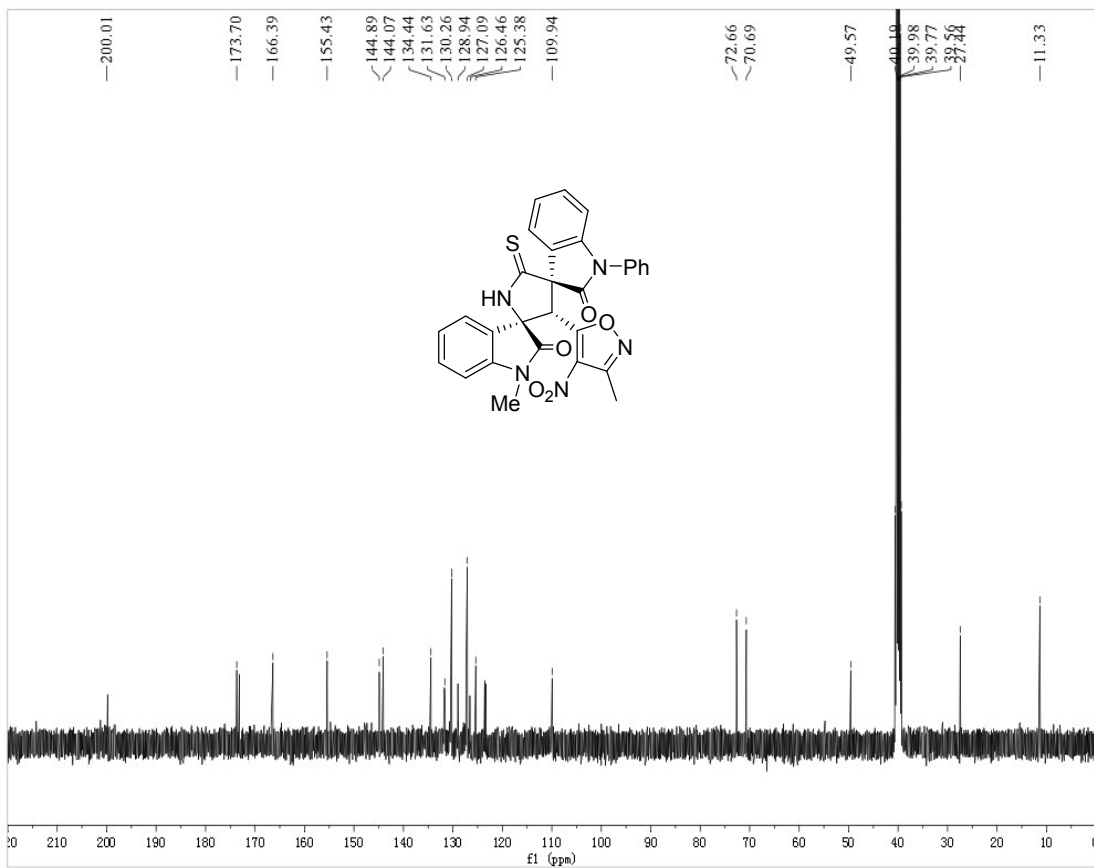

### HPLC of 3ad

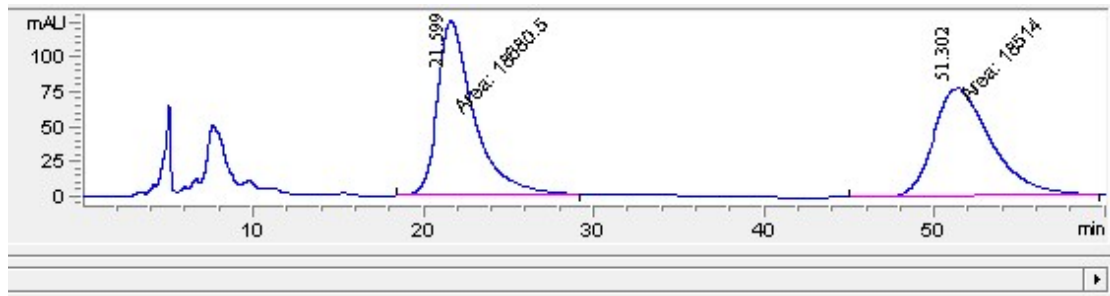

| # | Time   | Area    | Height | Width  | Area%  | Symmetry |
|---|--------|---------|--------|--------|--------|----------|
| 1 | 21.599 | 18680.5 | 125    | 2.4903 | 50.224 | 0.58     |
| 2 | 51.302 | 18514   | 77.9   | 3.963  | 49.776 | 0.67     |

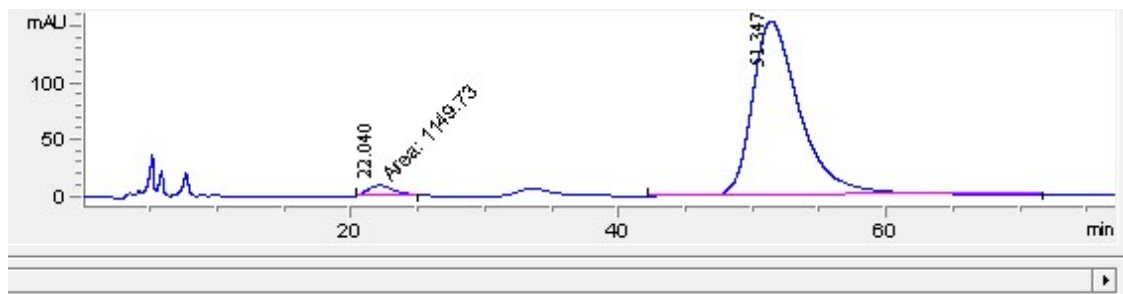

| # | Time   | Area    | Height | Width  | Area%  | Symmetry |
|---|--------|---------|--------|--------|--------|----------|
| 1 | 22.04  | 1149.7  | 8.7    | 2.1952 | 2.938  | 0.669    |
| 2 | 51.347 | 37984.5 | 154    | 3.7008 | 97.062 | 0.596    |

# <sup>1</sup>H and <sup>13</sup>C NMR of 3ae

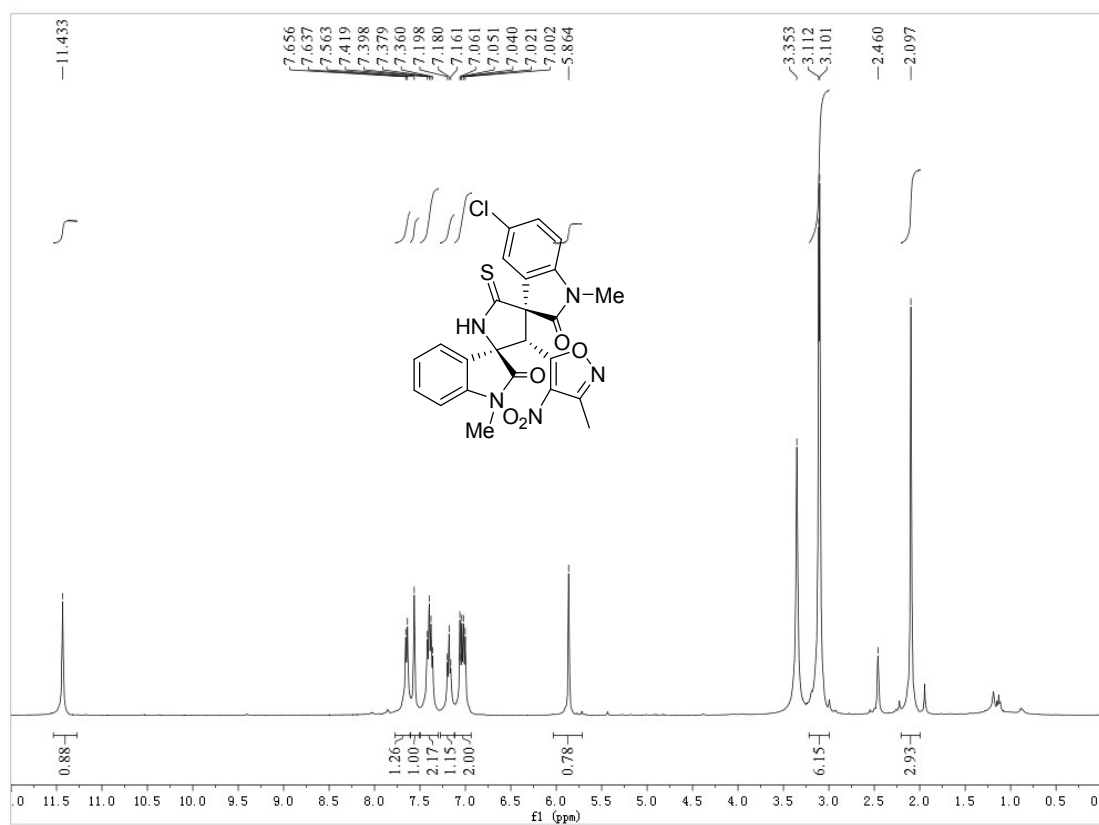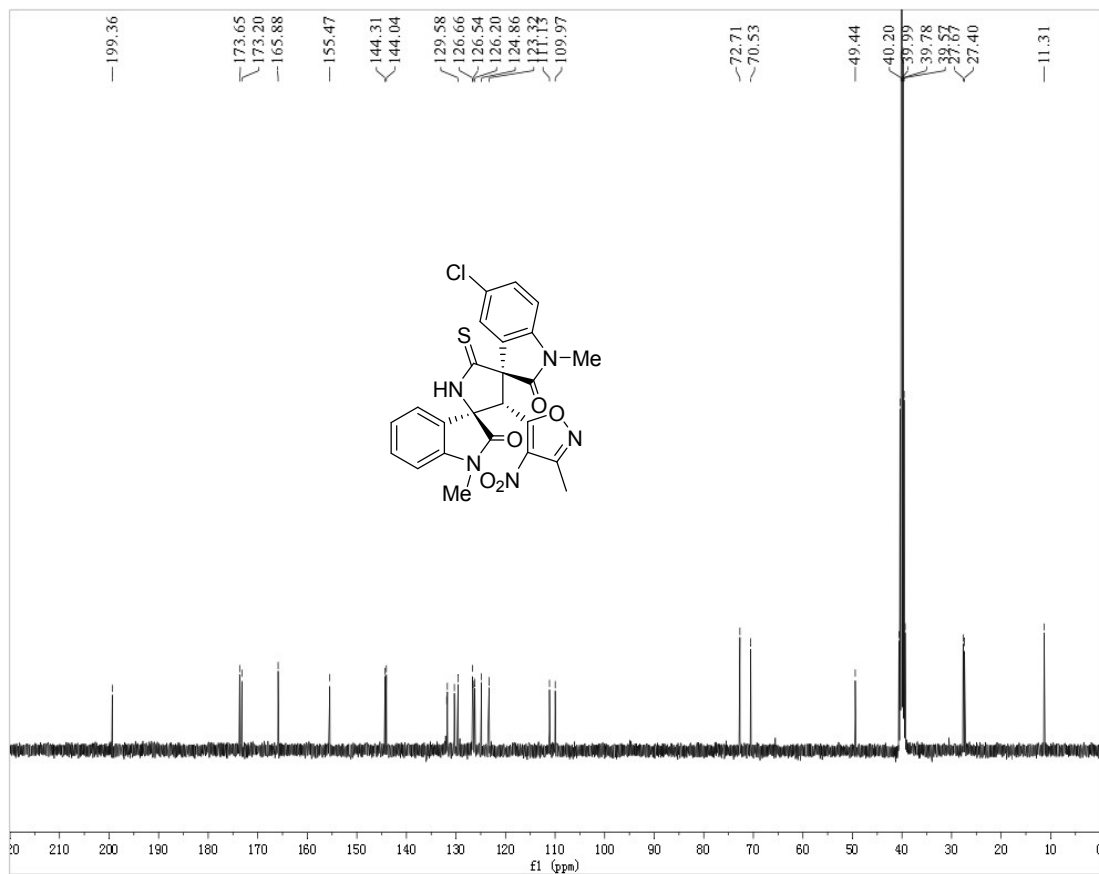

### HPLC of 3ae

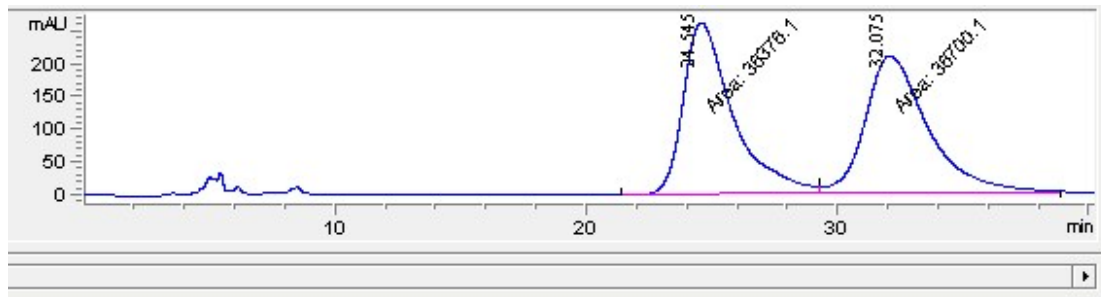

| # | Time   | Area    | Height | Width  | Area%  | Symmetry |
|---|--------|---------|--------|--------|--------|----------|
| 1 | 24.545 | 36376.1 | 263.6  | 2.2997 | 49.778 | 0.546    |
| 2 | 32.075 | 36700.1 | 210.5  | 2.9059 | 50.222 | 0.644    |

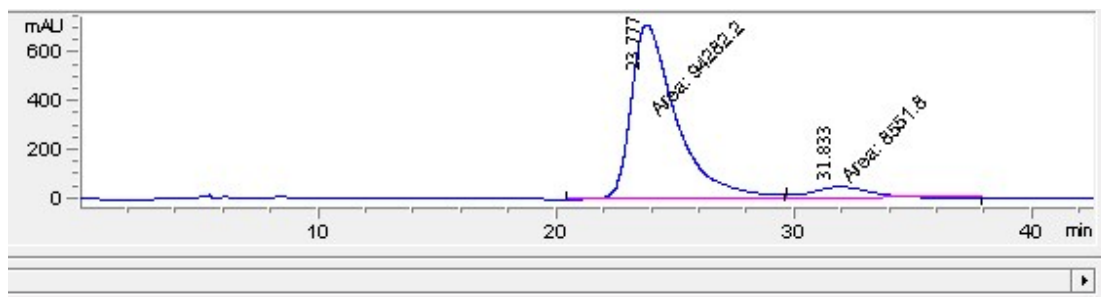

| # | Time   | Area    | Height | Width  | Area%  | Symmetry |
|---|--------|---------|--------|--------|--------|----------|
| 1 | 23.777 | 94282.2 | 716.8  | 2.1923 | 91.684 | 0.495    |
| 2 | 31.833 | 8551.8  | 47.1   | 3.0231 | 8.316  | 0.802    |

# <sup>1</sup>H and <sup>13</sup>C NMR of 3af

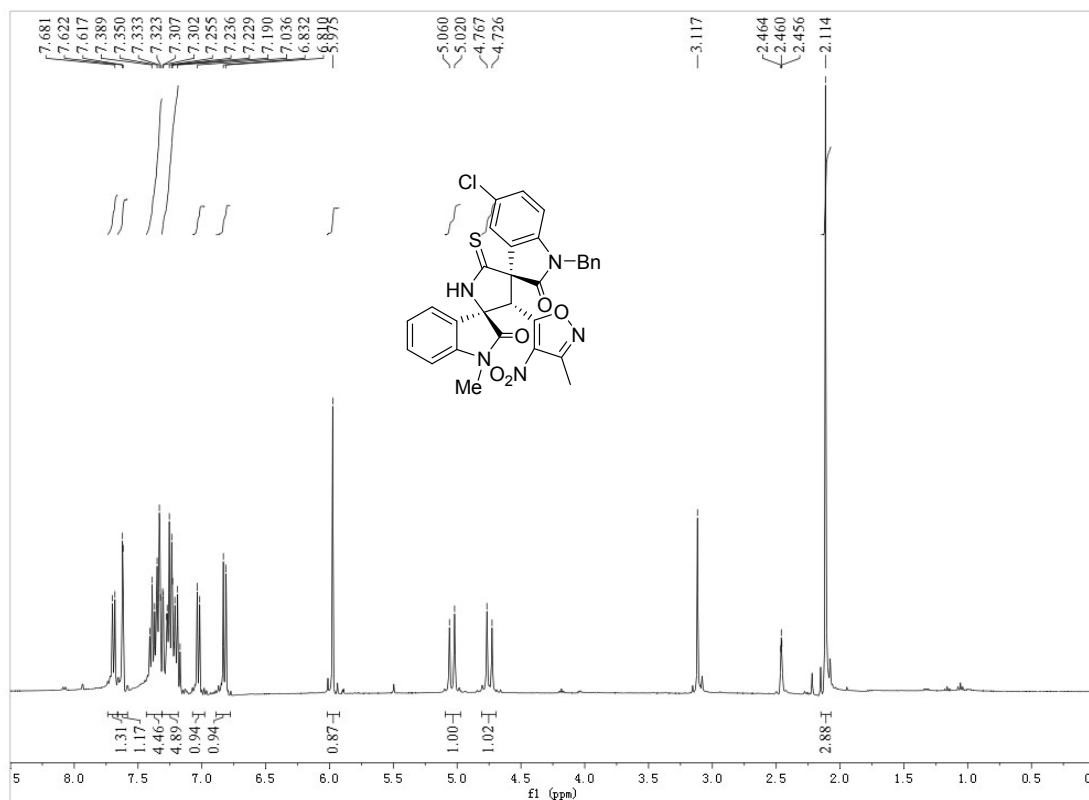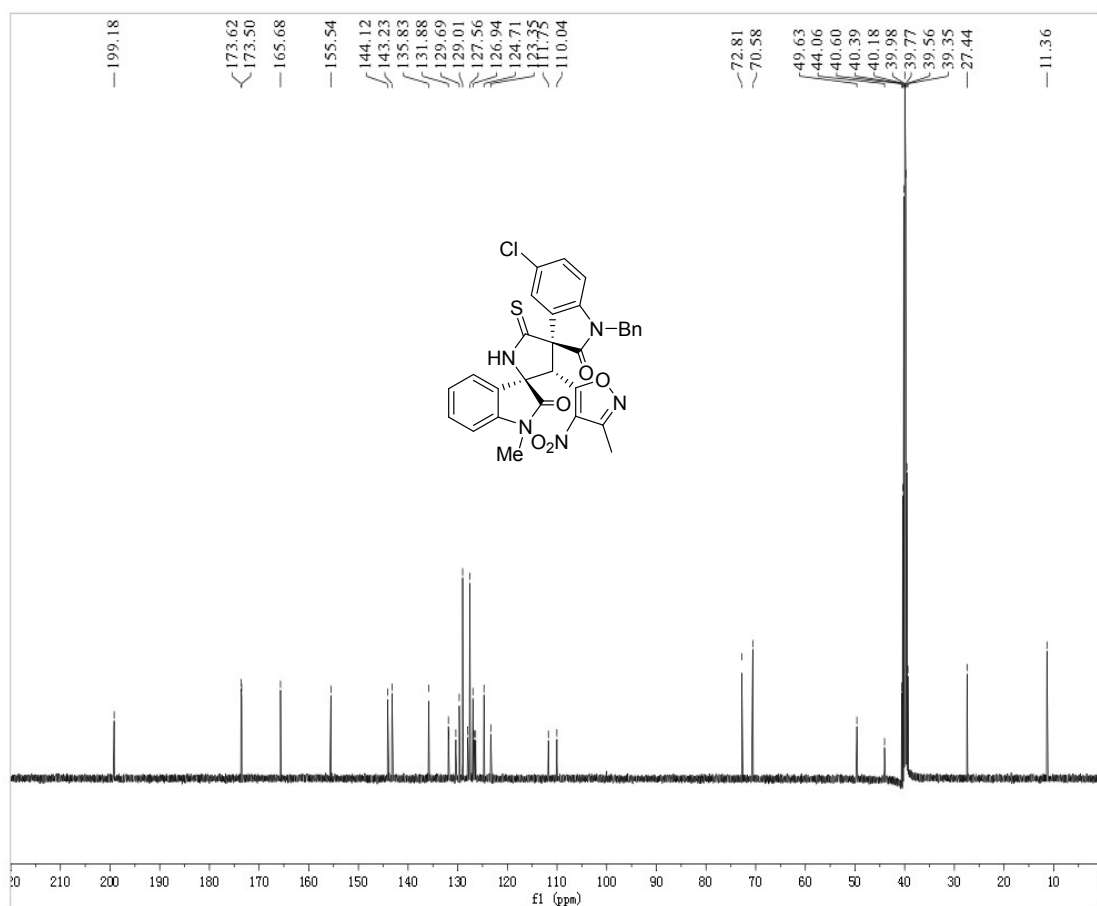



### HPLC of 3af

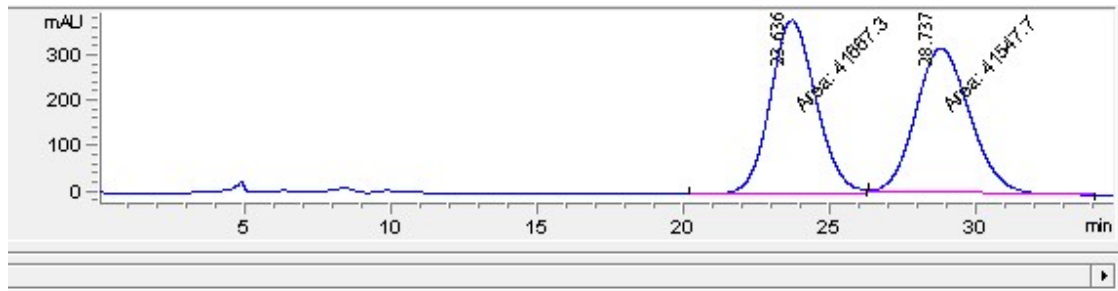

| # | Time   | Area    | Height | Width  | Area%  | Symmetry |
|---|--------|---------|--------|--------|--------|----------|
| 1 | 23.636 | 41667.3 | 381.6  | 1.8197 | 50.072 | 0.865    |
| 2 | 28.737 | 41547.7 | 319.6  | 2.1667 | 49.928 | 0.849    |

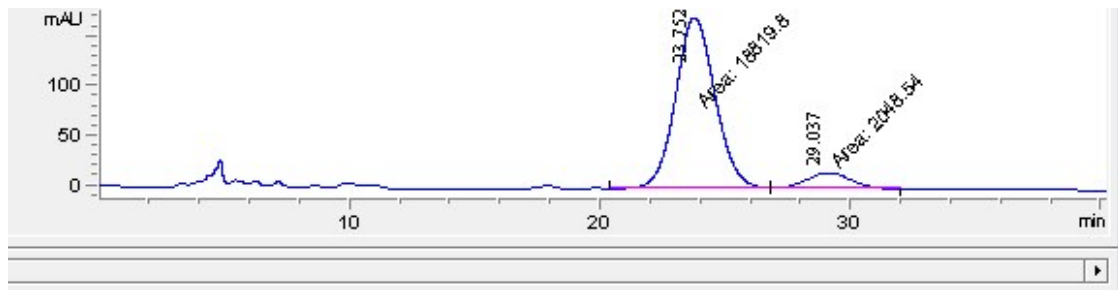

| # | Time   | Area    | Height | Width  | Area%  | Symmetry |
|---|--------|---------|--------|--------|--------|----------|
| 1 | 23.752 | 18819.8 | 172.2  | 1.821  | 90.184 | 0.89     |
| 2 | 29.037 | 2048.5  | 16.1   | 2.1165 | 9.816  | 0.974    |

# $^1\text{H}$ and $^{13}\text{C}$ NMR of 3ag

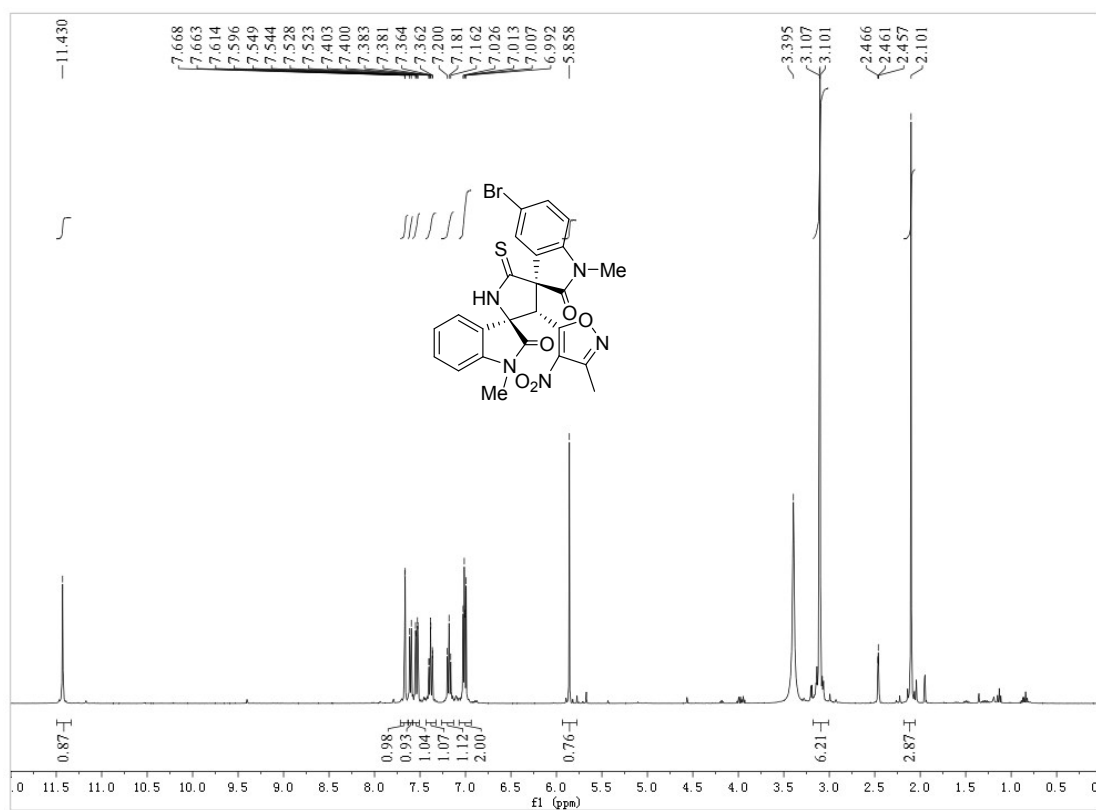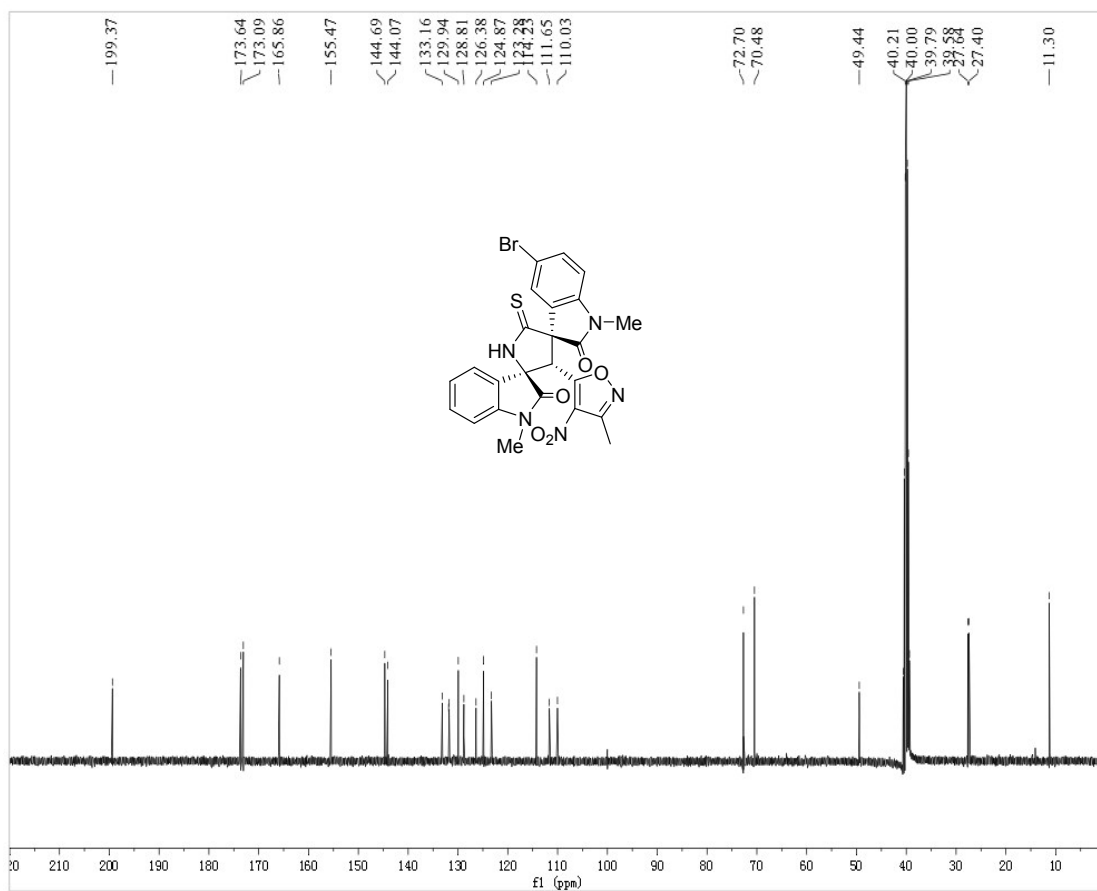

### HPLC of 3ag

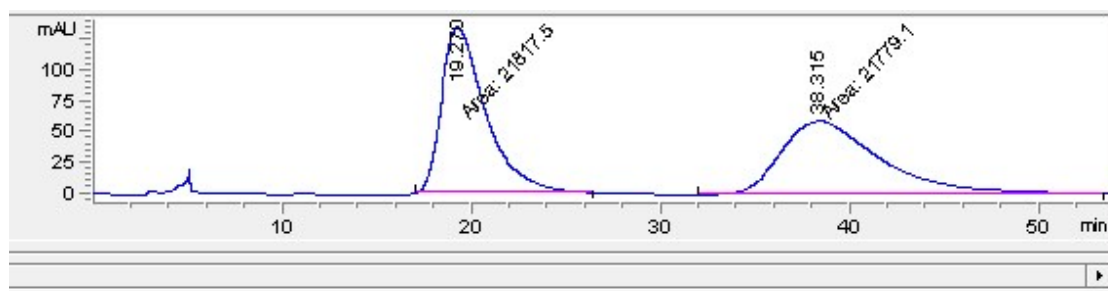

| # | Time   | Area    | Height | Width  | Area%  | Symmetry |
|---|--------|---------|--------|--------|--------|----------|
| 1 | 19.27  | 21817.5 | 134.7  | 2.6986 | 50.044 | 0.583    |
| 2 | 38.315 | 21779.1 | 59.5   | 6.0997 | 49.956 | 0.583    |

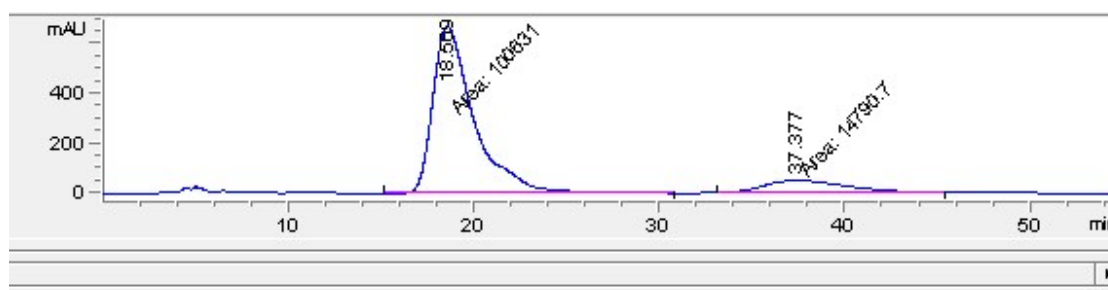

| # | Time   | Area     | Height | Width  | Area%  | Symmetry |
|---|--------|----------|--------|--------|--------|----------|
| 1 | 18.569 | 100630.9 | 665.5  | 2.5201 | 87.186 | 0.538    |
| 2 | 37.377 | 14790.7  | 48.1   | 5.1224 | 12.814 | 0.68     |

# <sup>1</sup>H and <sup>13</sup>C NMR of 3ba

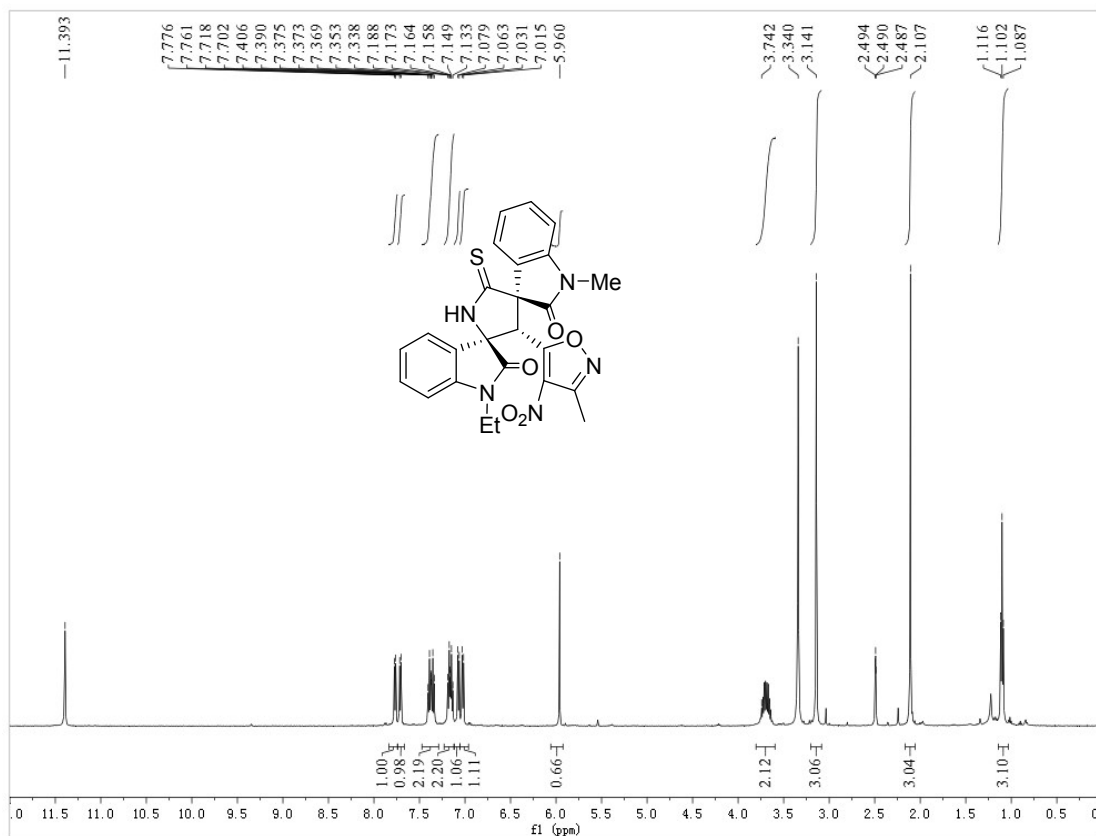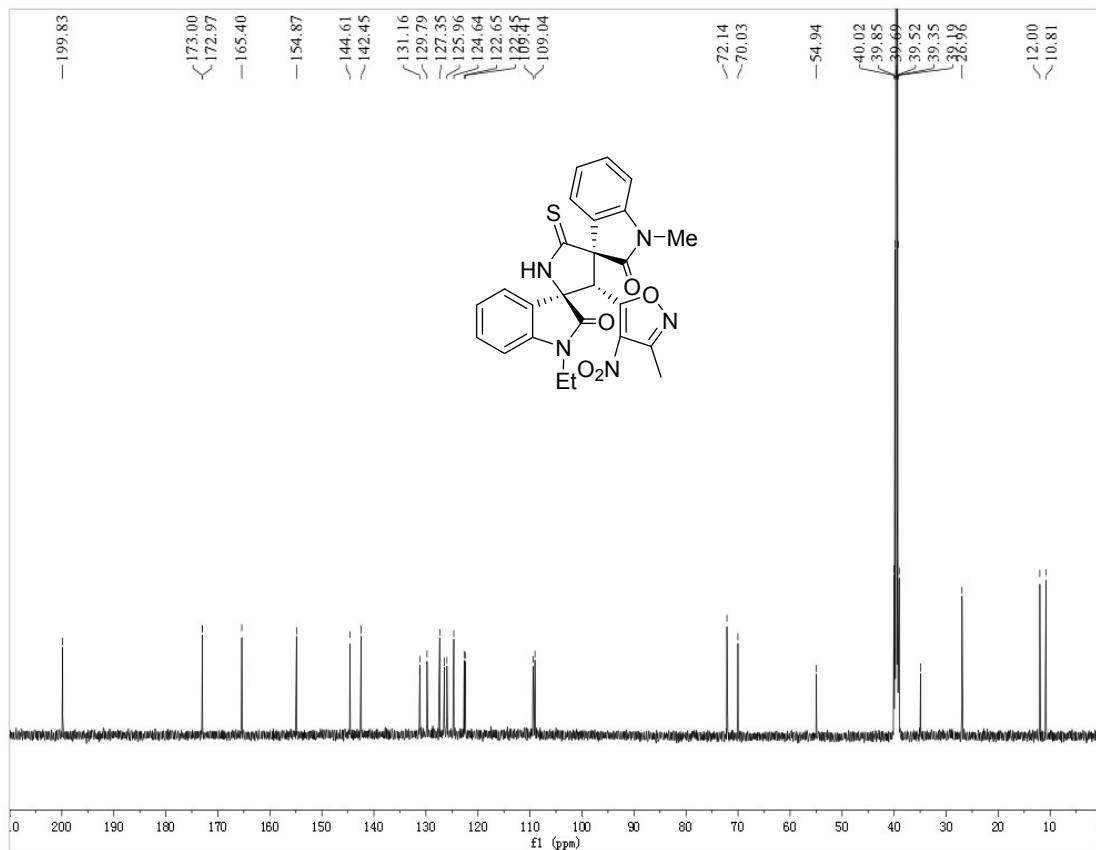

### HPLC of 3ba

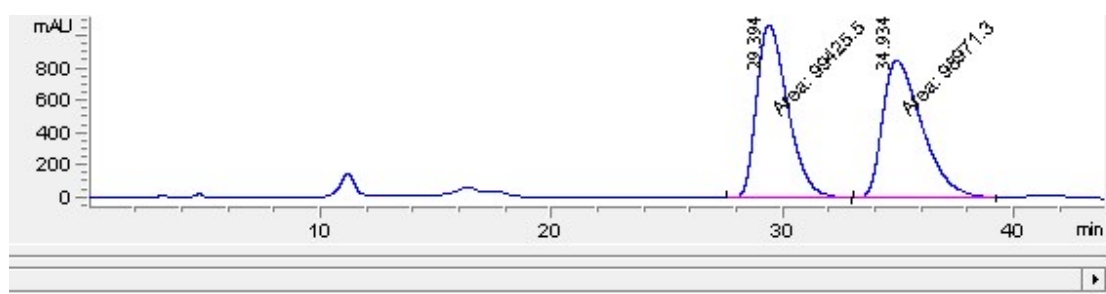

| # | Time   | Area    | Height | Width  | Area%  | Symmetry |
|---|--------|---------|--------|--------|--------|----------|
| 1 | 29.394 | 99425.5 | 1075.4 | 1.5409 | 50.114 | 0.641    |
| 2 | 34.934 | 98971.3 | 849.1  | 1.9427 | 49.886 | 0.555    |

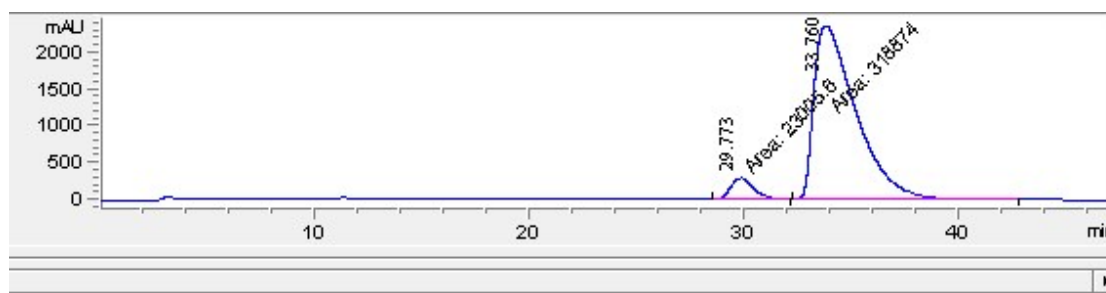

| # | Time   | Area     | Height | Width  | Area%  | Symmetry |
|---|--------|----------|--------|--------|--------|----------|
| 1 | 29.773 | 23005.6  | 293.4  | 1.3068 | 6.729  | 0.718    |
| 2 | 33.76  | 318873.7 | 2365.7 | 2.2465 | 93.271 | 0.382    |

# $^1\text{H}$ and $^{13}\text{C}$ NMR of 3bd

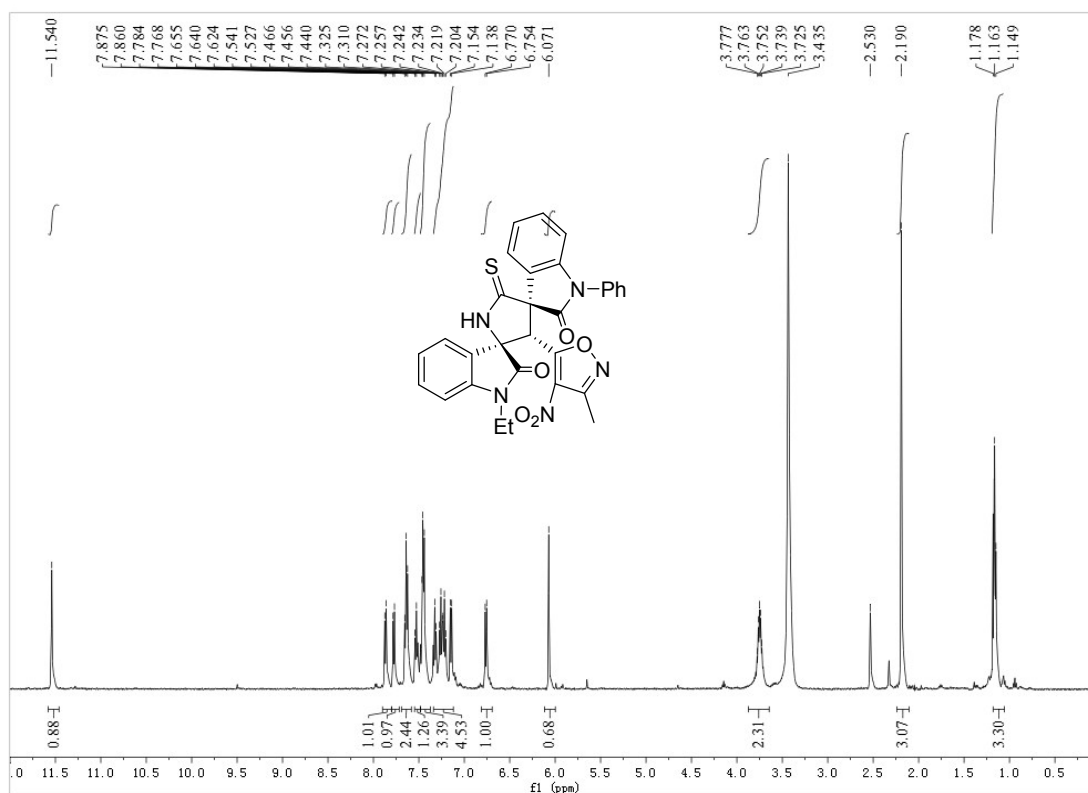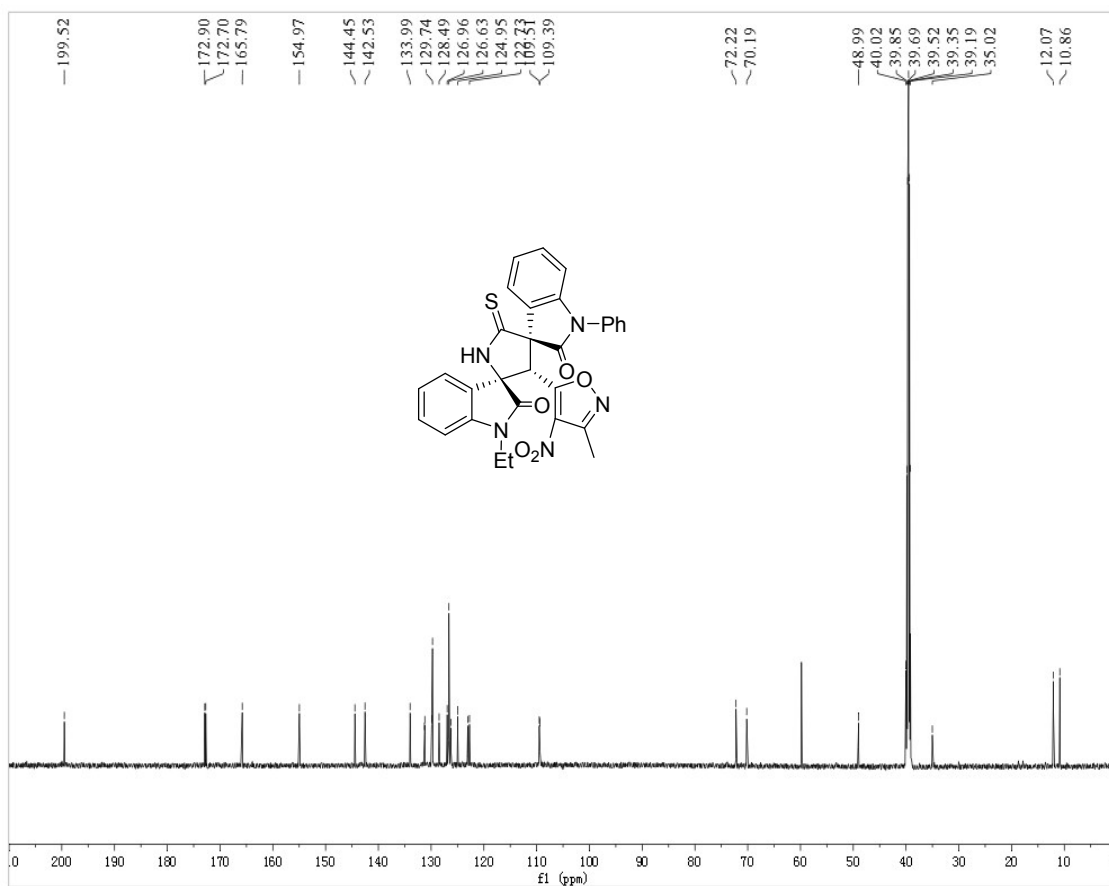

### HPLC of 3bd

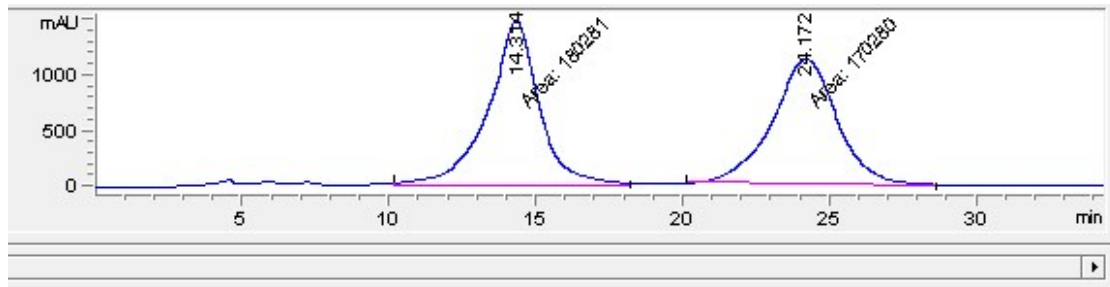

| # | Time   | Area     | Height | Width  | Area%  | Symmetry |
|---|--------|----------|--------|--------|--------|----------|
| 1 | 14.314 | 180281.5 | 1477.2 | 2.034  | 51.427 | 1.213    |
| 2 | 24.172 | 170279.8 | 1113.5 | 2.5488 | 48.573 | 1.049    |

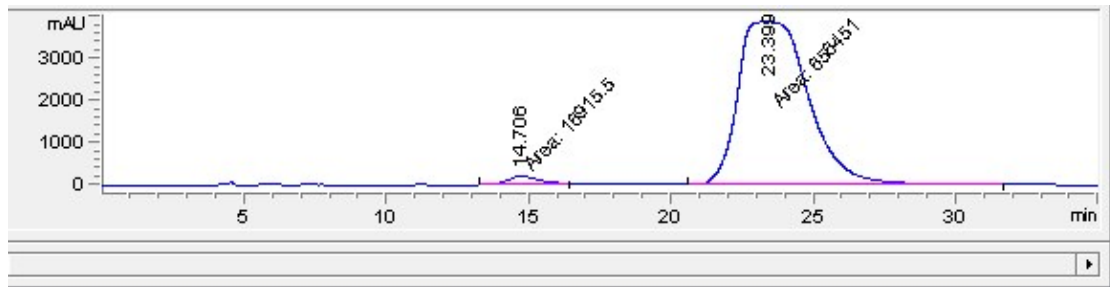

| # | Time   | Area     | Height | Width  | Area%  | Symmetry |
|---|--------|----------|--------|--------|--------|----------|
| 1 | 14.706 | 16915.5  | 204.9  | 1.3756 | 2.512  | 0.685    |
| 2 | 23.399 | 656450.8 | 3864.3 | 2.8313 | 97.488 | 0.573    |

# $^1\text{H}$ and $^{13}\text{C}$ NMR of 3be

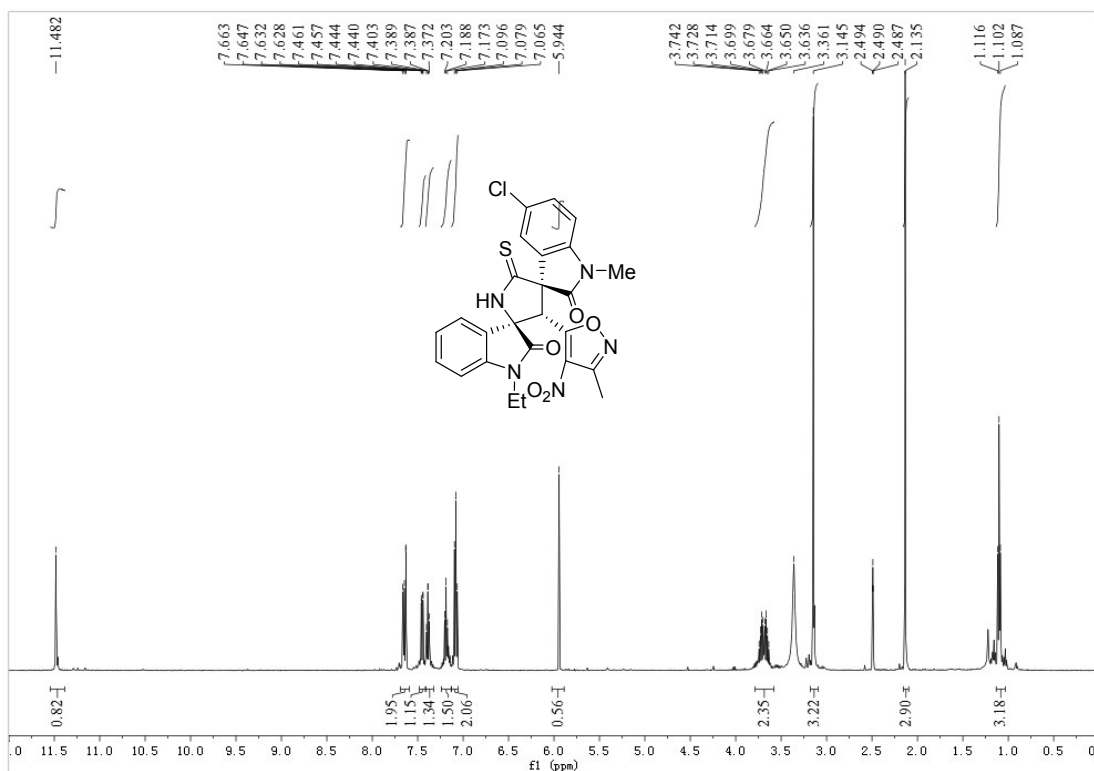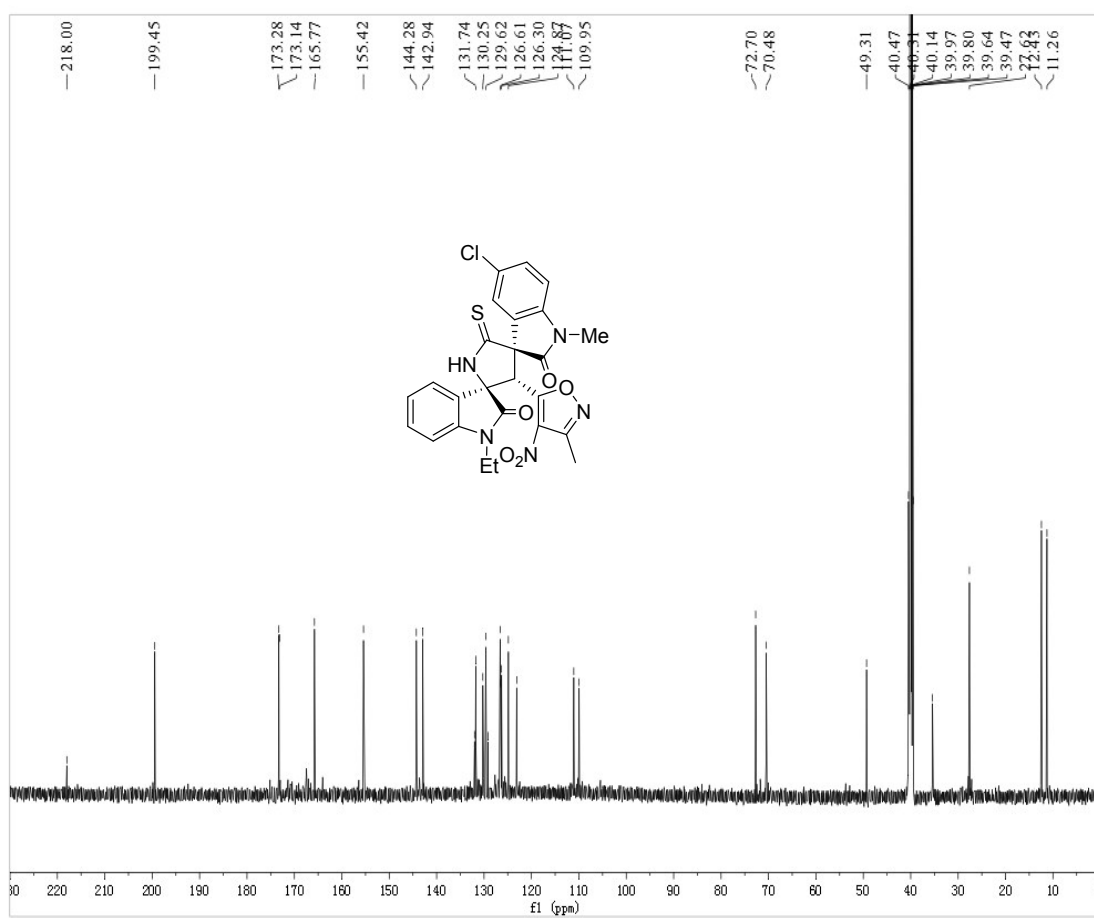



### HPLC of 3be

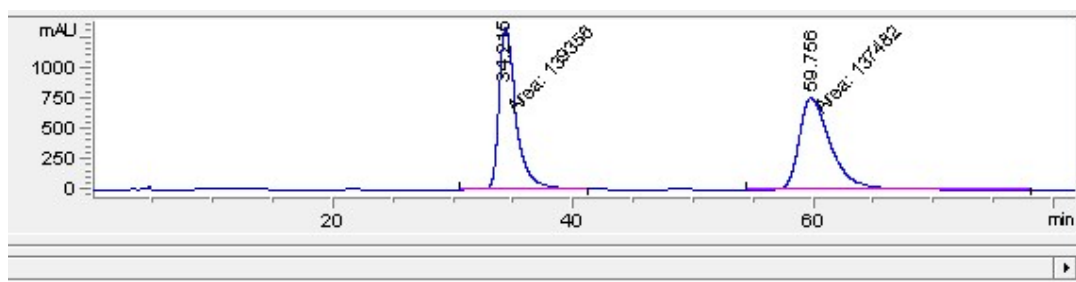

| # | Time   | Area     | Height | Width  | Area%  | Symmetry |
|---|--------|----------|--------|--------|--------|----------|
| 1 | 34.215 | 139356.5 | 1323.8 | 1.7545 | 50.338 | 0.559    |
| 2 | 59.756 | 137482.3 | 754.5  | 3.037  | 49.662 | 0.581    |

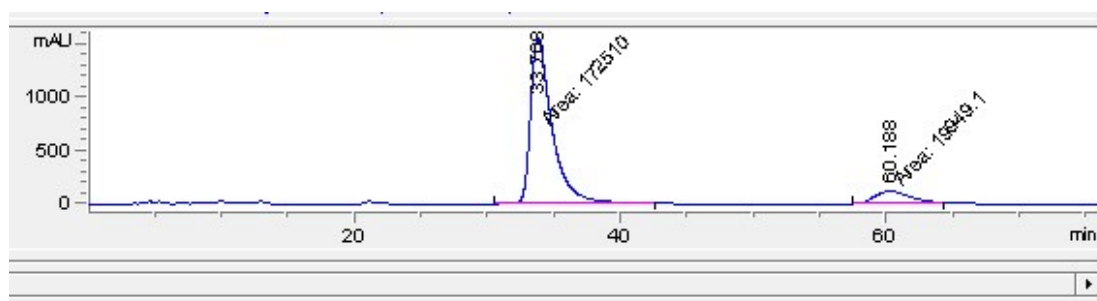

| # | Time   | Area     | Height | Width  | Area%  | Symmetry |
|---|--------|----------|--------|--------|--------|----------|
| 1 | 33.768 | 172510.2 | 1548.5 | 1.8567 | 89.635 | 0.501    |
| 2 | 60.188 | 19949.1  | 115.8  | 2.8721 | 10.365 | 0.726    |

# <sup>1</sup>H and <sup>13</sup>C NMR of 3ca

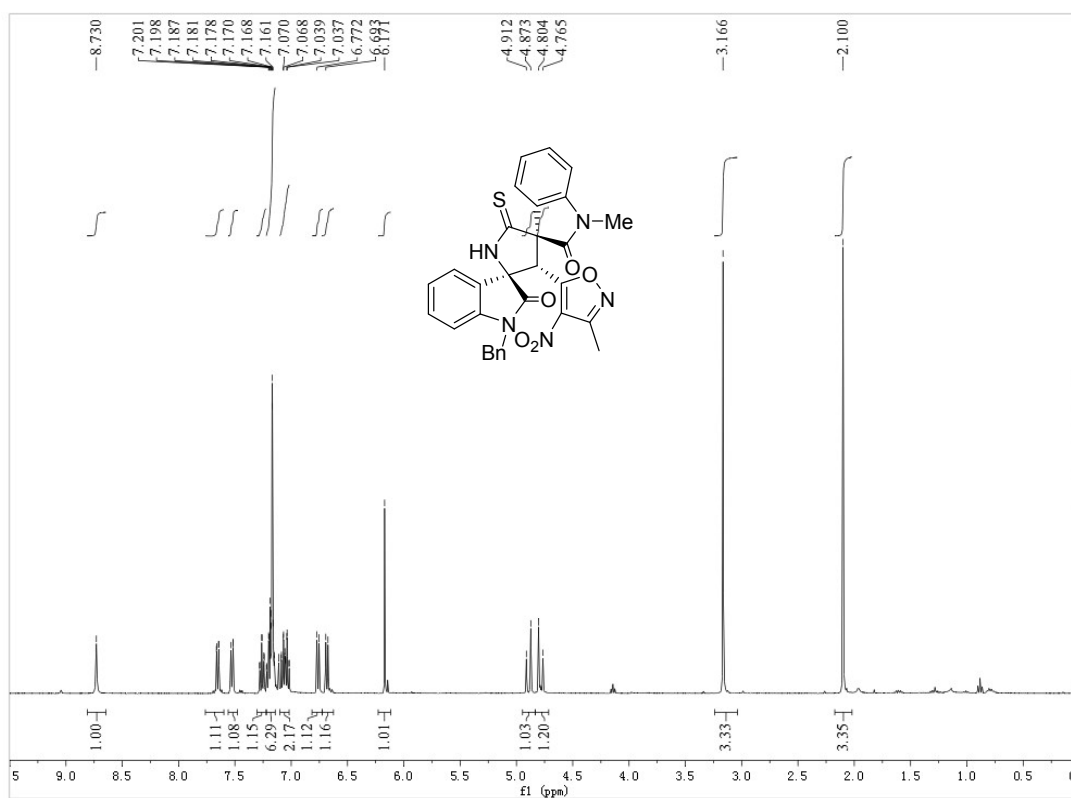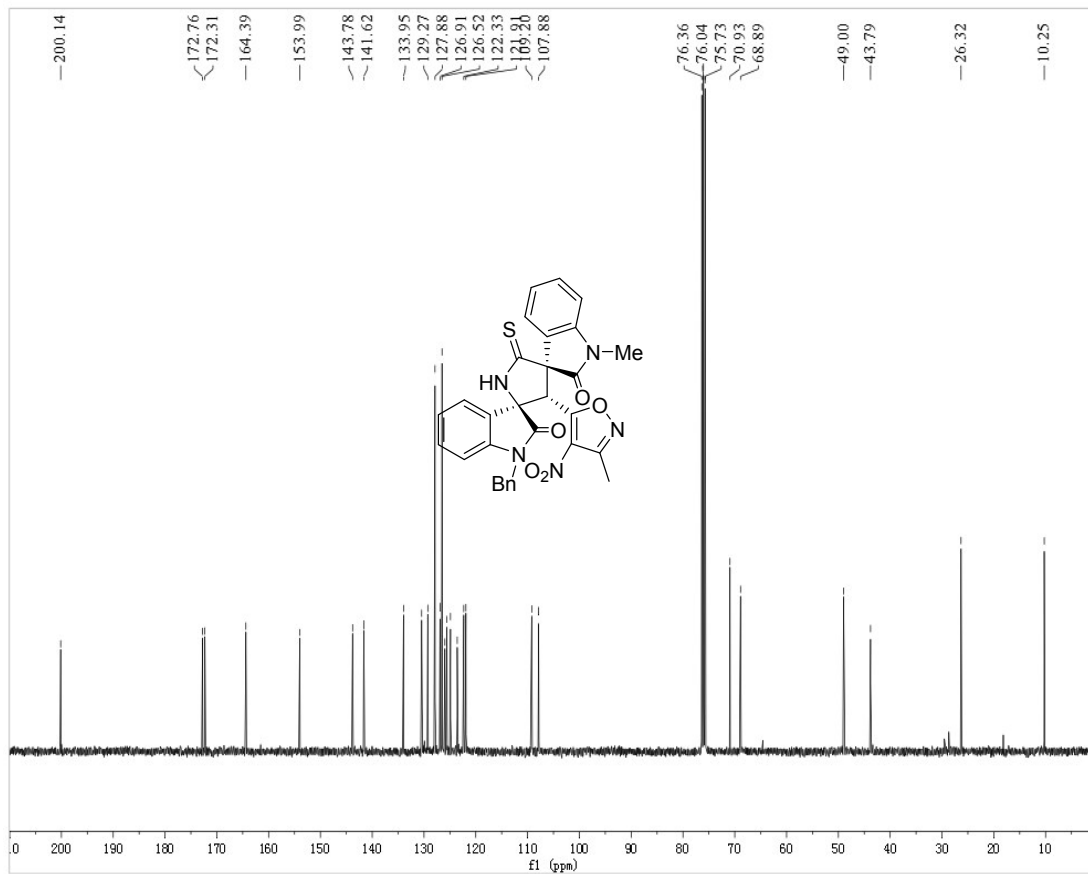

### HPLC of 3ca

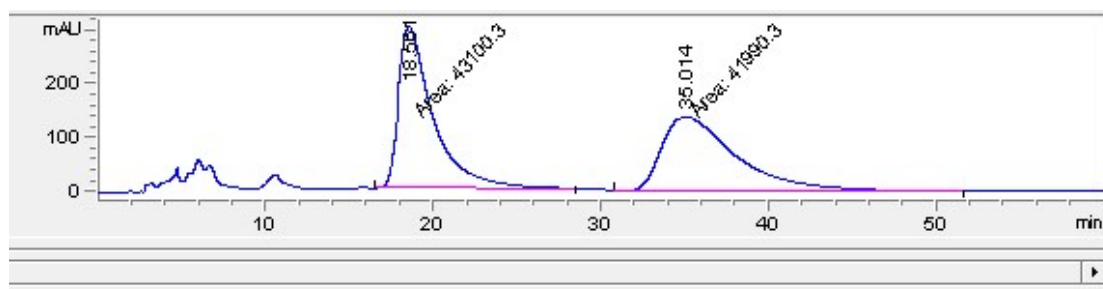

| # | Time   | Area    | Height | Width  | Area%  | Symmetry |
|---|--------|---------|--------|--------|--------|----------|
| 1 | 18.561 | 43100.3 | 298.2  | 2.4085 | 50.652 | 0.455    |
| 2 | 35.014 | 41990.3 | 138.2  | 5.0631 | 49.348 | 0.457    |

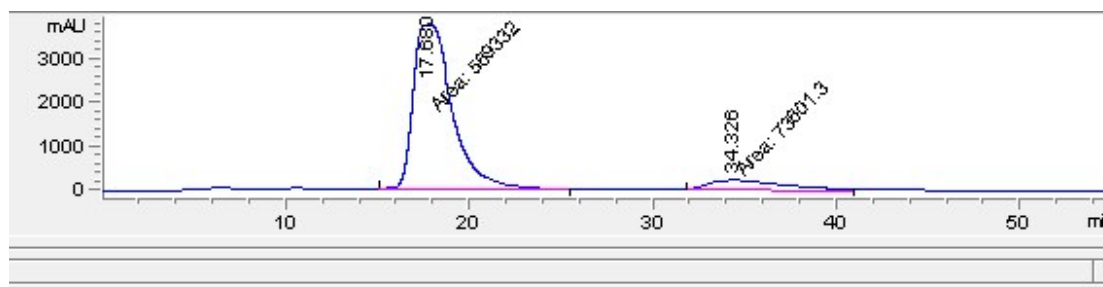

| # | Time   | Area     | Height | Width  | Area%  | Symmetry |
|---|--------|----------|--------|--------|--------|----------|
| 1 | 17.68  | 569331.6 | 3791.7 | 2.5026 | 88.552 | 0.561    |
| 2 | 34.326 | 73601.3  | 233.7  | 5.2495 | 11.448 | 0.417    |

### $^1\text{H}$ and $^{13}\text{C}$ NMR of 3c

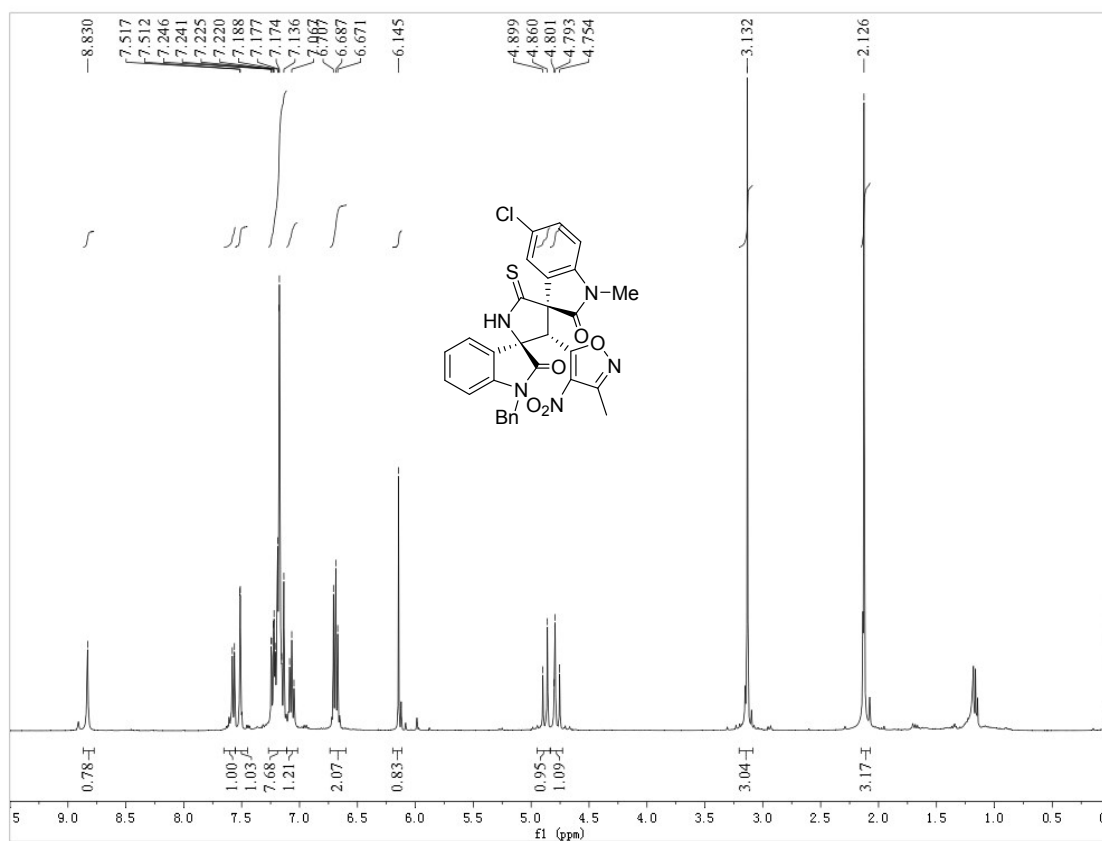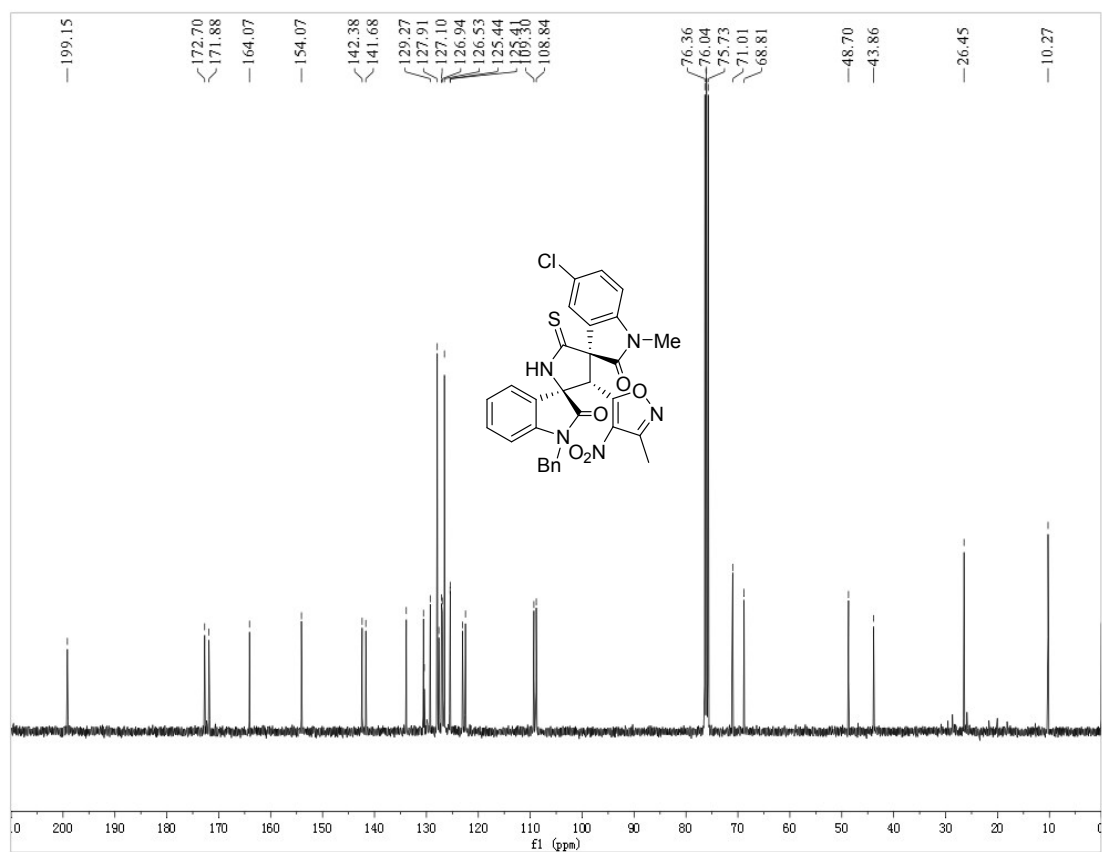

### HPLC of 3ce

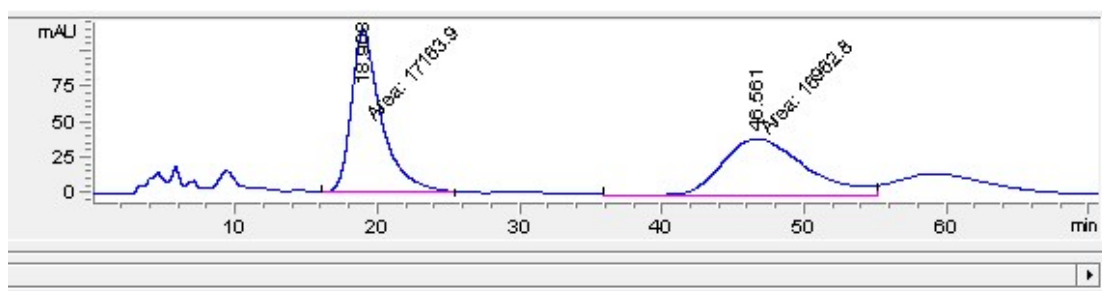

| # | Time   | Area    | Height | Width  | Area%  | Symmetry |
|---|--------|---------|--------|--------|--------|----------|
| 1 | 18.908 | 17163.9 | 114.4  | 2.5012 | 50.295 | 0.616    |
| 2 | 46.561 | 16962.8 | 40.5   | 6.9774 | 49.705 | 0.699    |

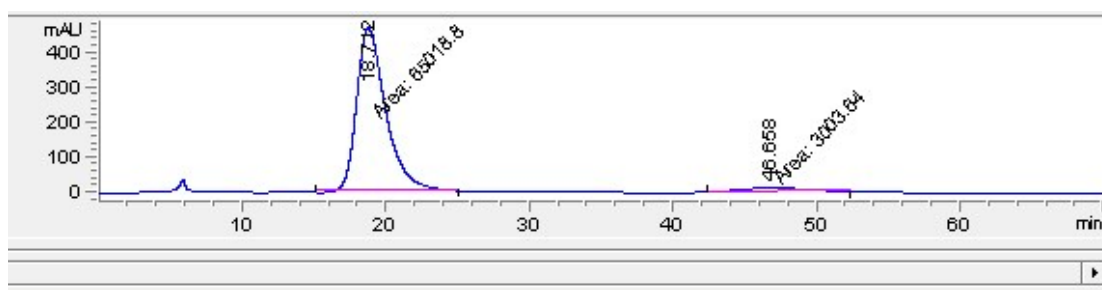

| # | Time   | Area    | Height | Width  | Area%  | Symmetry |
|---|--------|---------|--------|--------|--------|----------|
| 1 | 18.712 | 65018.8 | 464.5  | 2.3328 | 95.584 | 0.636    |
| 2 | 46.658 | 3003.6  | 9.8    | 3.6116 | 4.416  | 0.781    |

# <sup>1</sup>H and <sup>13</sup>C NMR of 3cf

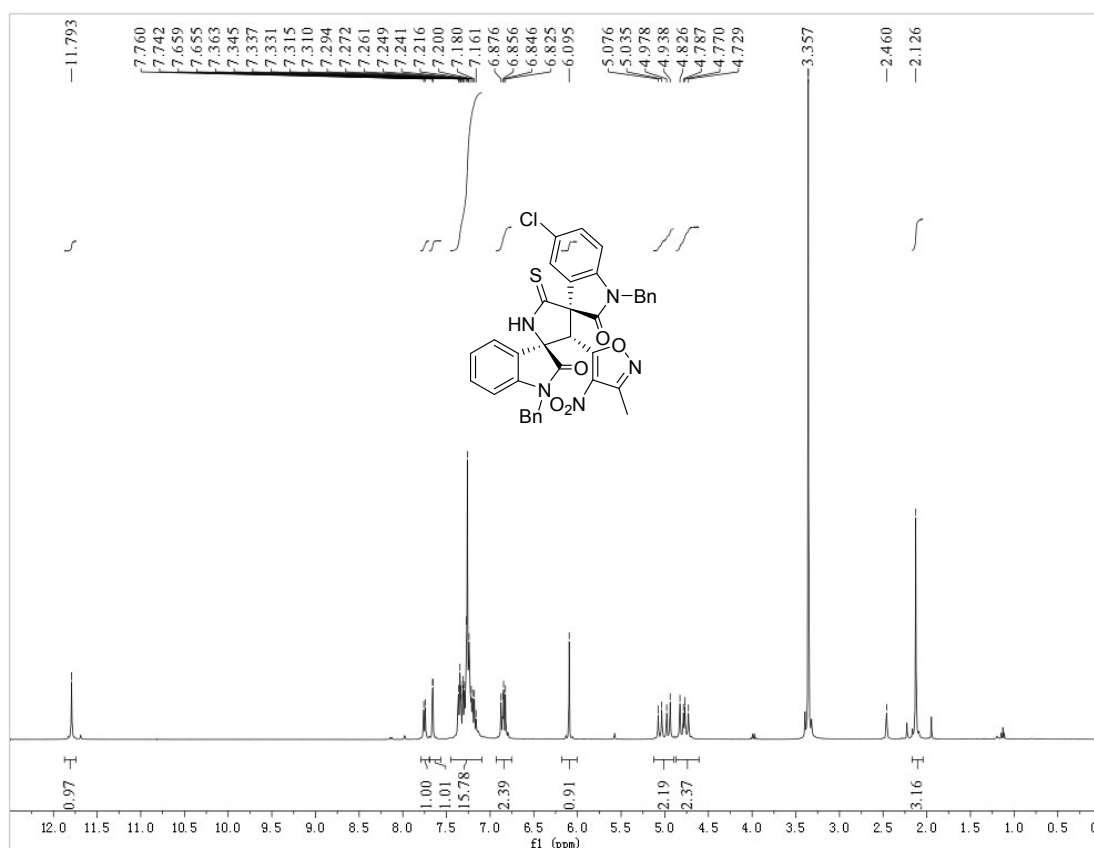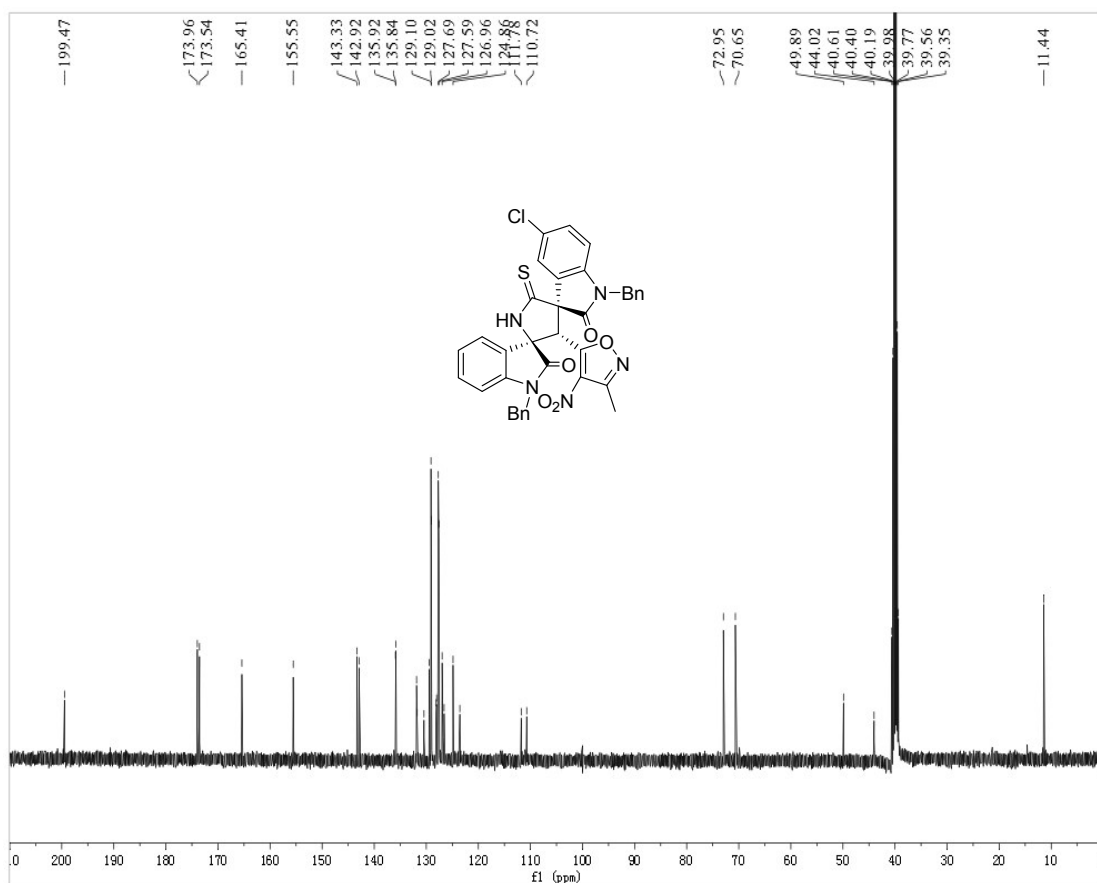

### HPLC of 3cf

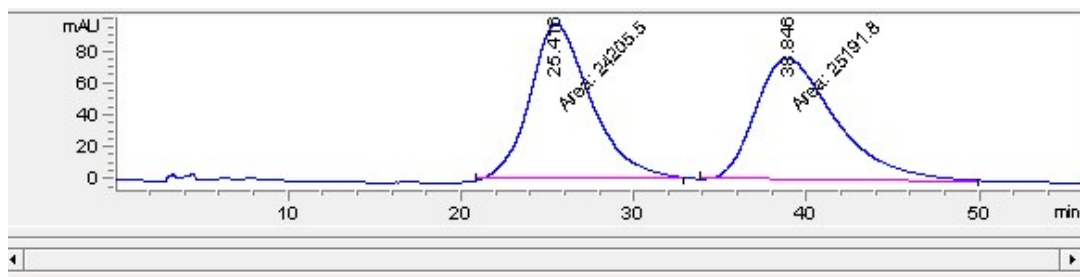

| # | Time   | Area    | Height | Width  | Area%  | Symmetry |
|---|--------|---------|--------|--------|--------|----------|
| 1 | 25.416 | 24205.5 | 97.3   | 4.1441 | 49.002 | 0.72     |
| 2 | 38.846 | 25191.8 | 76.4   | 5.4955 | 50.998 | 0.615    |

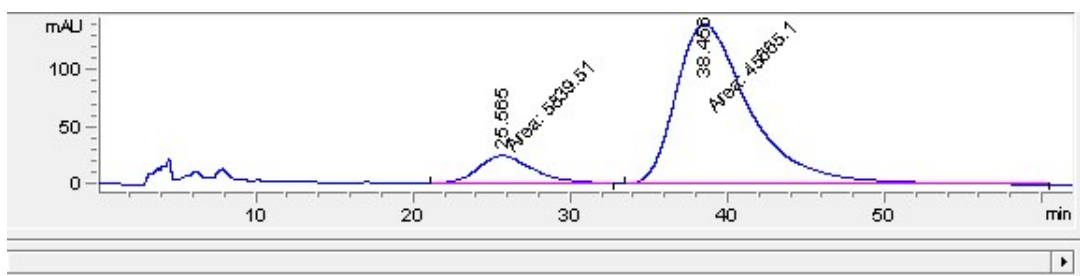

| # | Time   | Area    | Height | Width  | Area%  | Symmetry |
|---|--------|---------|--------|--------|--------|----------|
| 1 | 25.565 | 5839.5  | 24.3   | 4.0005 | 11.338 | 0.738    |
| 2 | 38.456 | 45665.1 | 140.5  | 5.4172 | 88.662 | 0.585    |

# <sup>1</sup>H and <sup>13</sup>C NMR of 3c

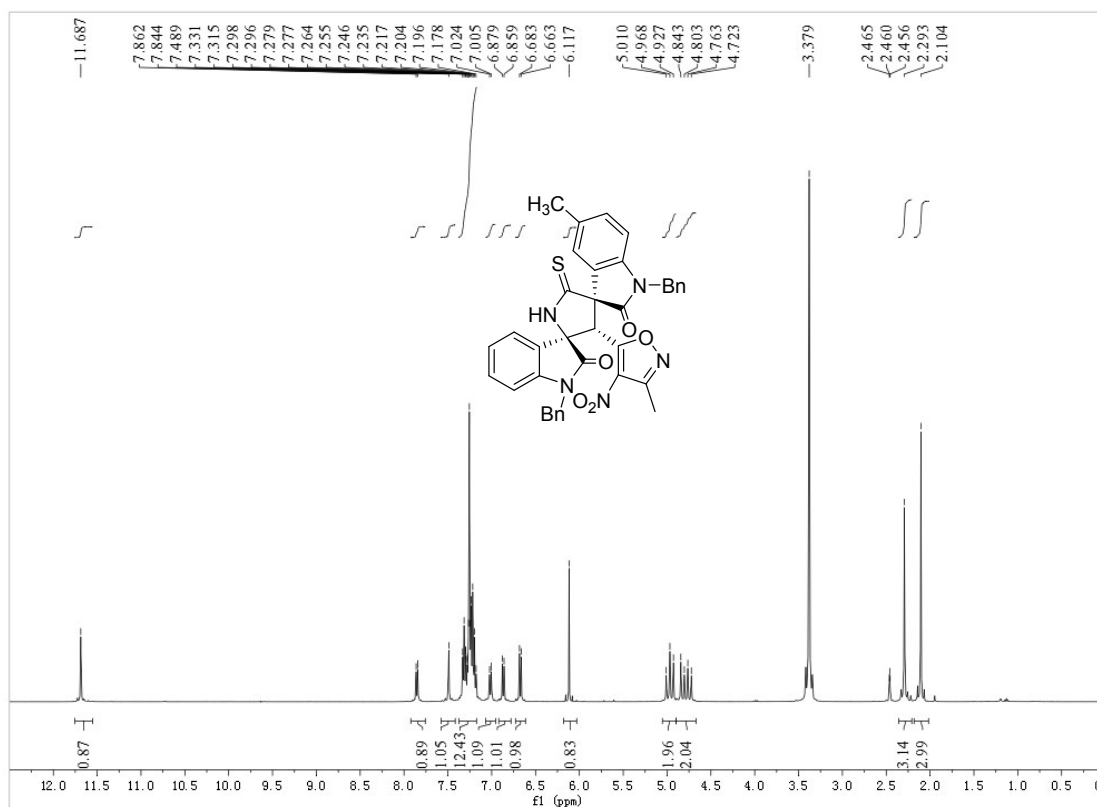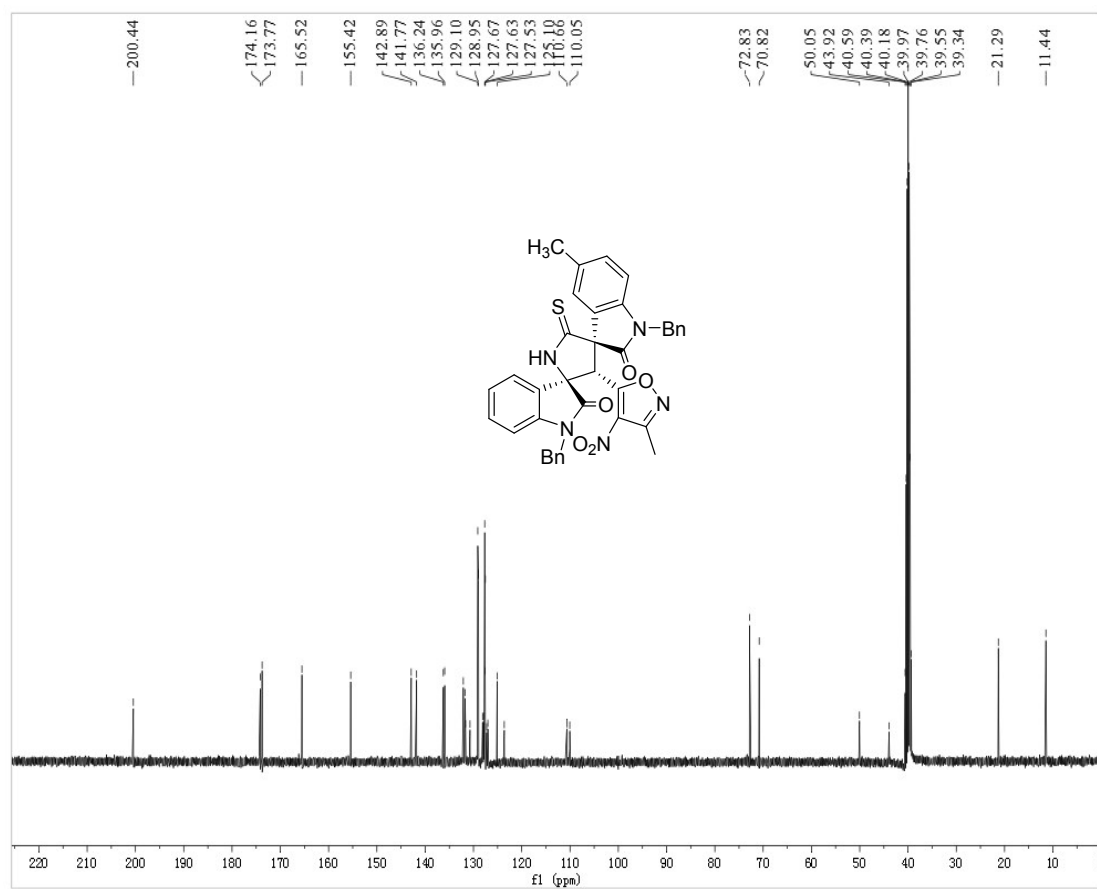



### HPLC of 3ch

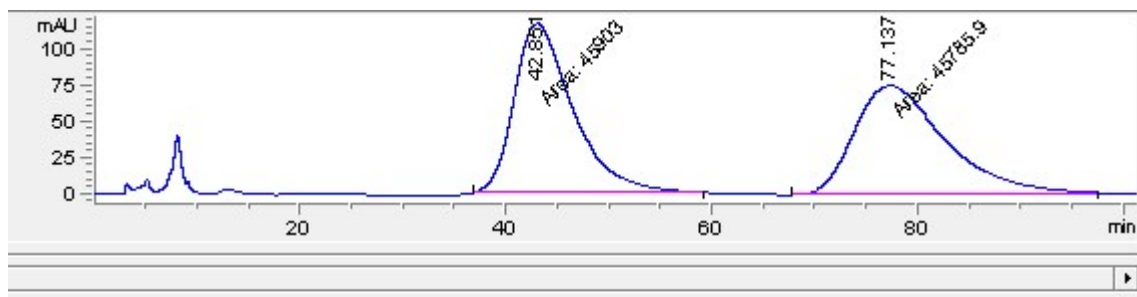

| # | Time   | Area    | Height | Width   | Area%  | Symmetry |
|---|--------|---------|--------|---------|--------|----------|
| 1 | 42.851 | 45903   | 116.1  | 6.5876  | 50.064 | 0.603    |
| 2 | 77.137 | 45785.9 | 74.3   | 10.2637 | 49.936 | 0.599    |

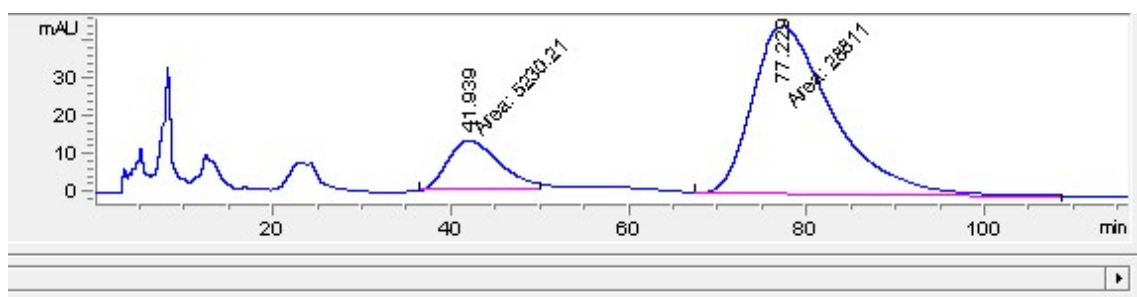

| # | Time   | Area   | Height | Width   | Area%  | Symmetry |
|---|--------|--------|--------|---------|--------|----------|
| 1 | 41.939 | 5230.2 | 12.9   | 6.7555  | 15.364 | 0.676    |
| 2 | 77.229 | 28811  | 44.6   | 10.7686 | 84.636 | 0.575    |

# <sup>1</sup>H and <sup>13</sup>C NMR of 3de

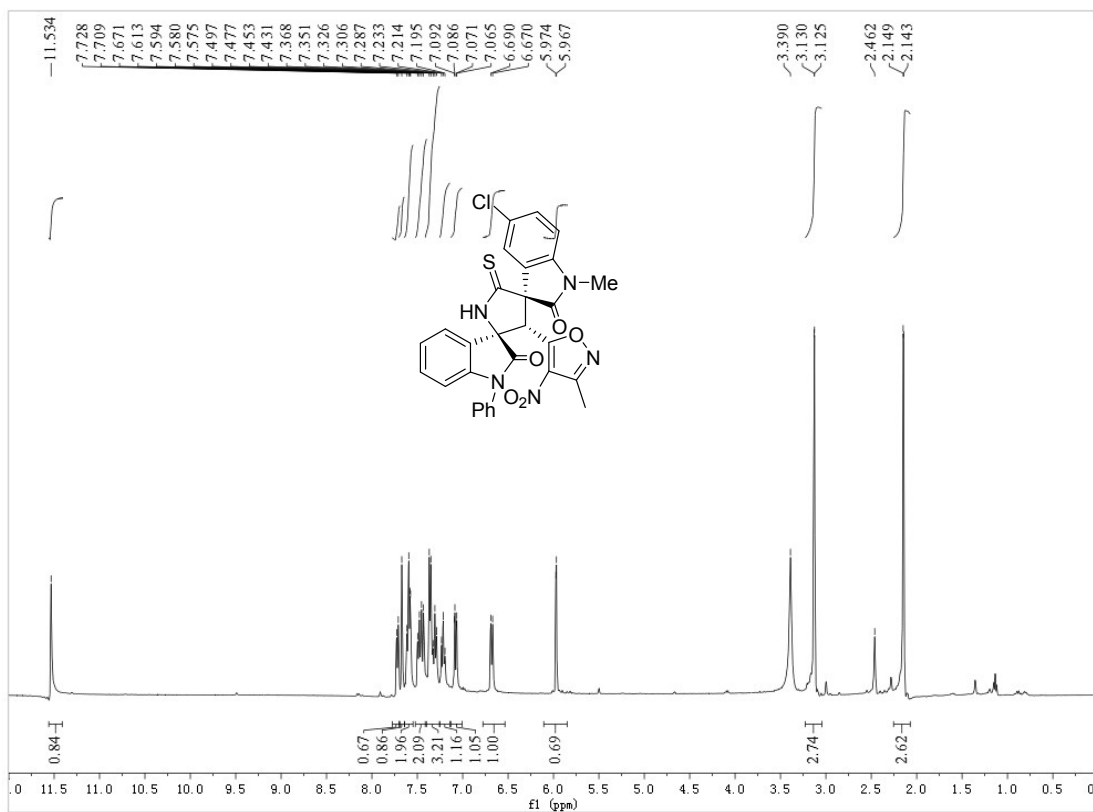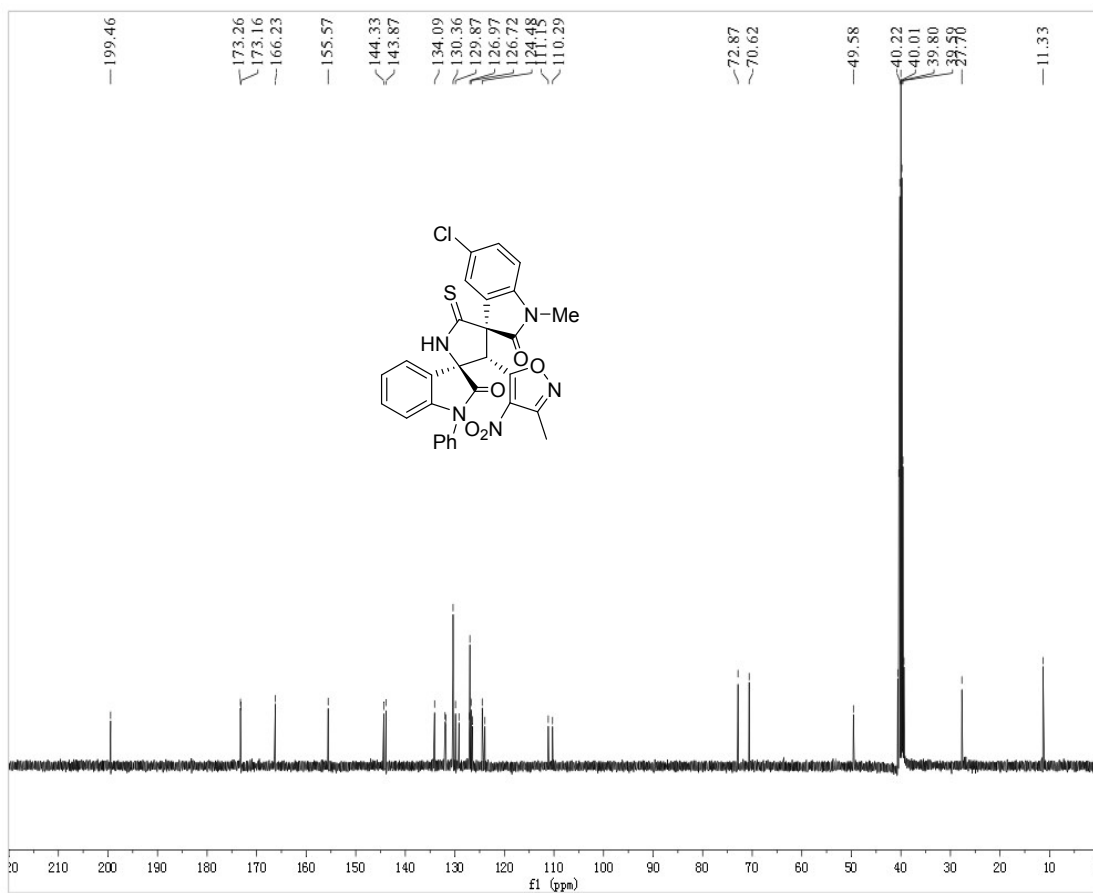

### HPLC of 3de

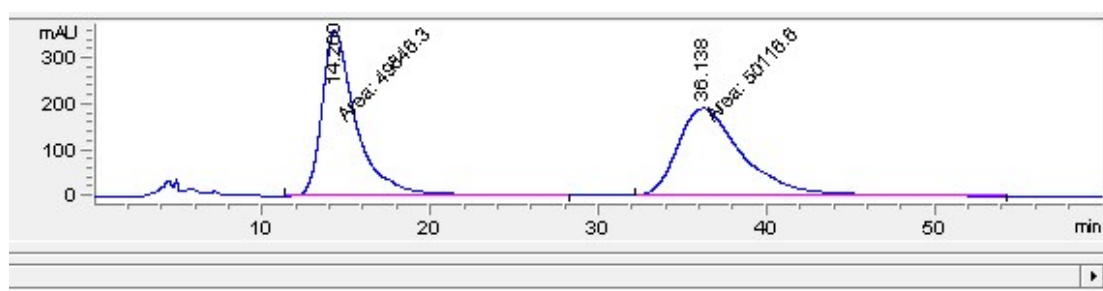

| # | Time   | Area    | Height | Width  | Area%  | Symmetry |
|---|--------|---------|--------|--------|--------|----------|
| 1 | 14.26  | 49846.3 | 359.8  | 2.3092 | 49.865 | 0.567    |
| 2 | 36.138 | 50116.6 | 189.4  | 4.4101 | 50.135 | 0.59     |

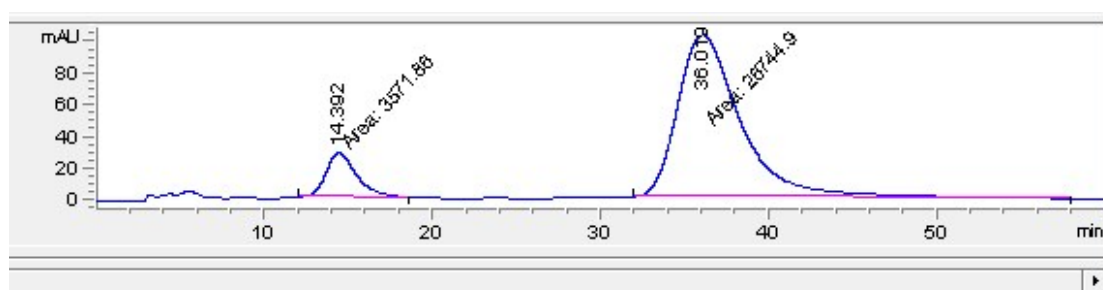

| # | Time   | Area    | Height | Width  | Area%  | Symmetry |
|---|--------|---------|--------|--------|--------|----------|
| 1 | 14.392 | 3571.9  | 27.8   | 2.1389 | 11.782 | 0.674    |
| 2 | 36.019 | 26744.9 | 102.2  | 4.3613 | 88.218 | 0.603    |

# <sup>1</sup>H and <sup>13</sup>C NMR of 3ea

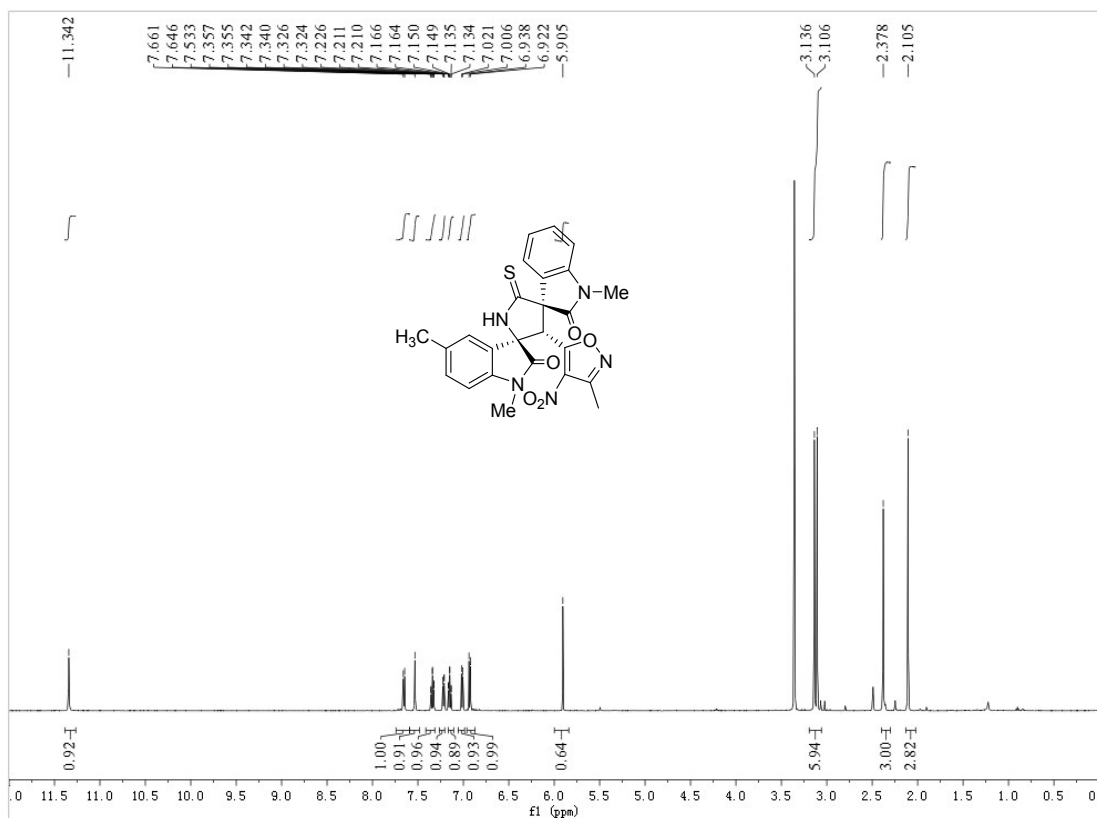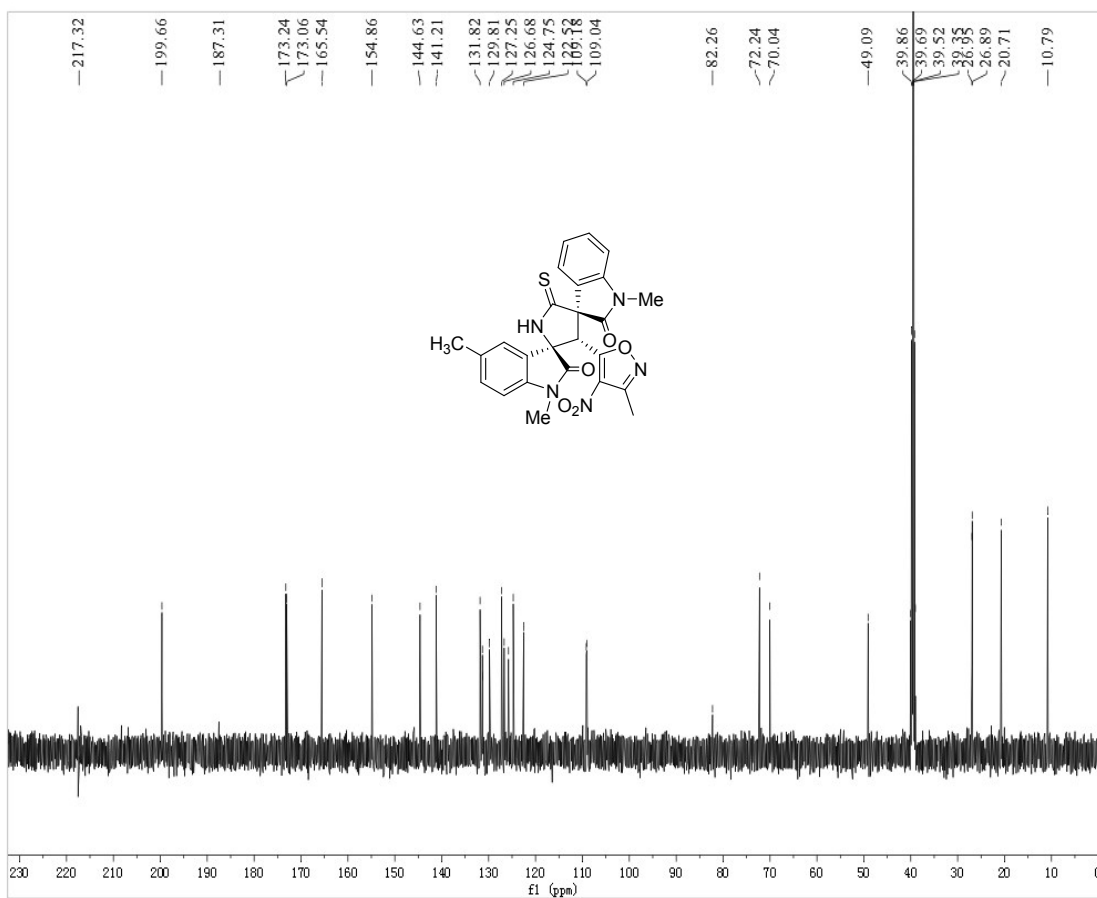

### HPLC of 3ea

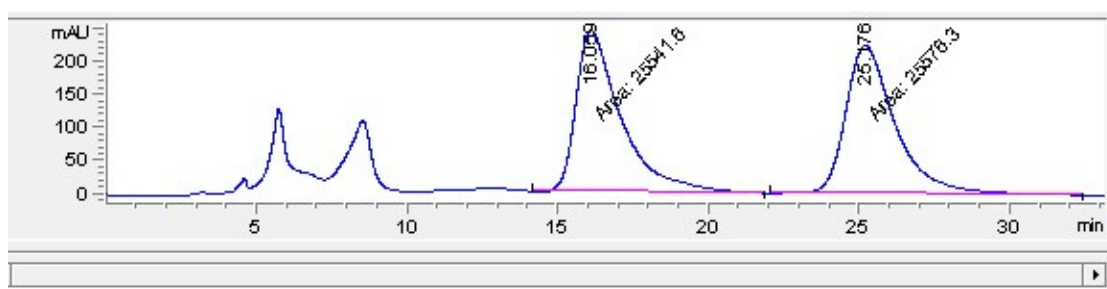

| # | Time   | Area    | Height | Width  | Area%  | Symmetry |
|---|--------|---------|--------|--------|--------|----------|
| 1 | 16.059 | 25541.6 | 244    | 1.7448 | 49.966 | 0.477    |
| 2 | 25.176 | 25576.3 | 223.1  | 1.9107 | 50.034 | 0.615    |

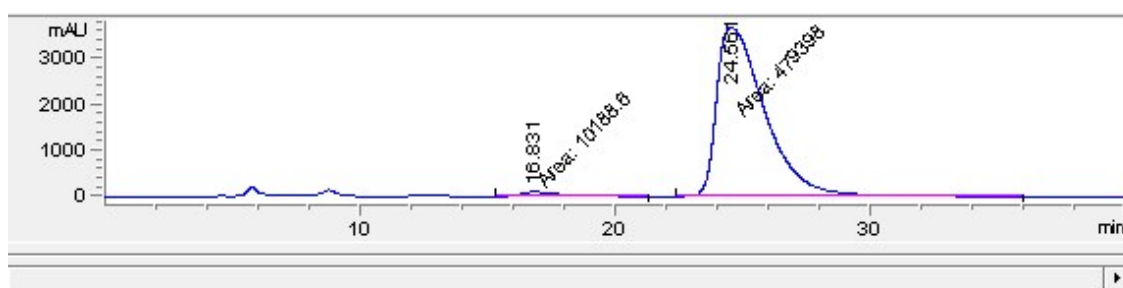

| # | Time   | Area     | Height | Width  | Area%  | Symmetry |
|---|--------|----------|--------|--------|--------|----------|
| 1 | 16.831 | 10188.6  | 96.6   | 1.7571 | 2.081  | 0.489    |
| 2 | 24.561 | 479398.2 | 3659.5 | 2.1834 | 97.919 | 0.433    |

# $^1\text{H}$ and $^{13}\text{C}$ NMR of 3ed

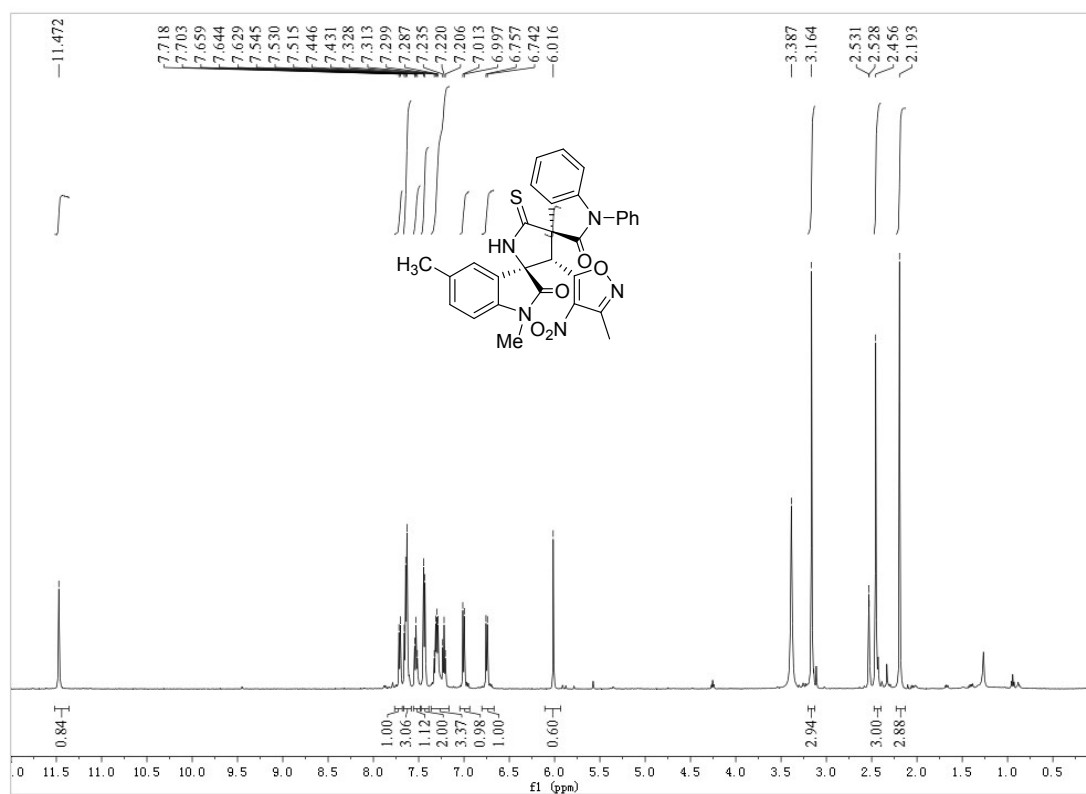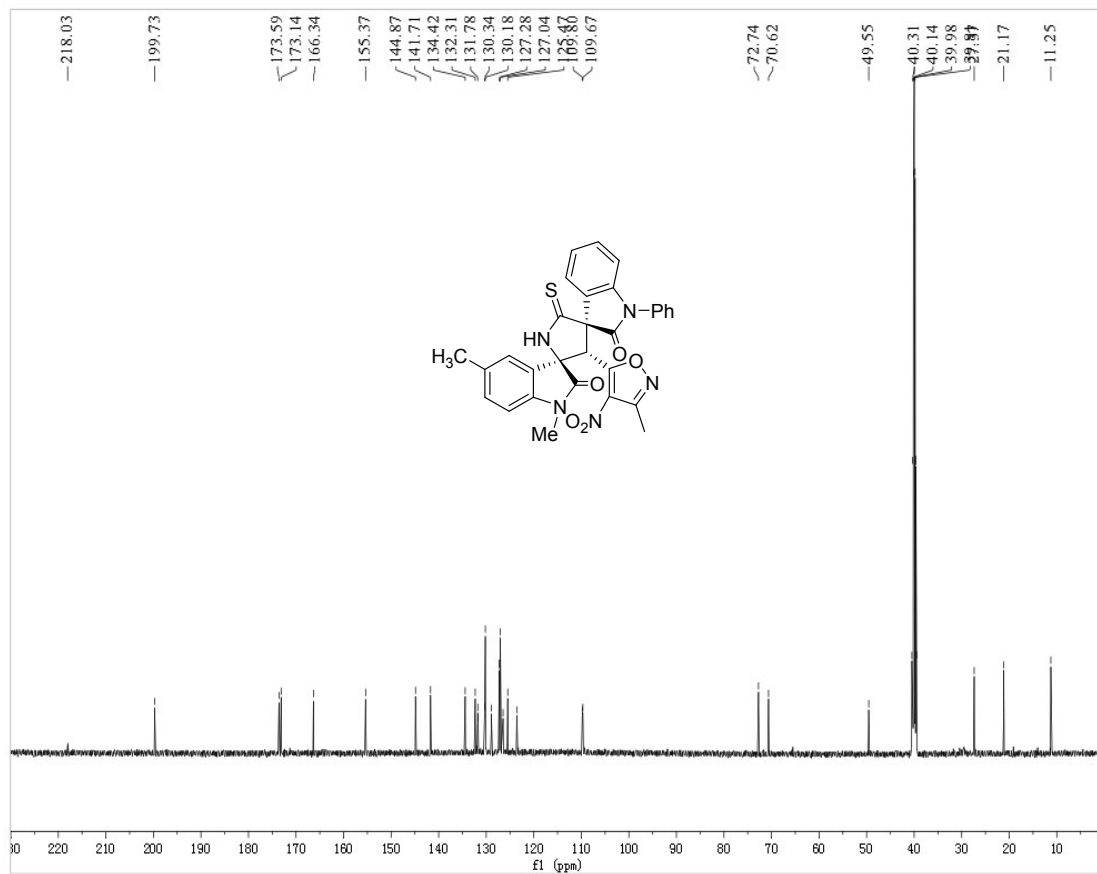

### HPLC of 3ed

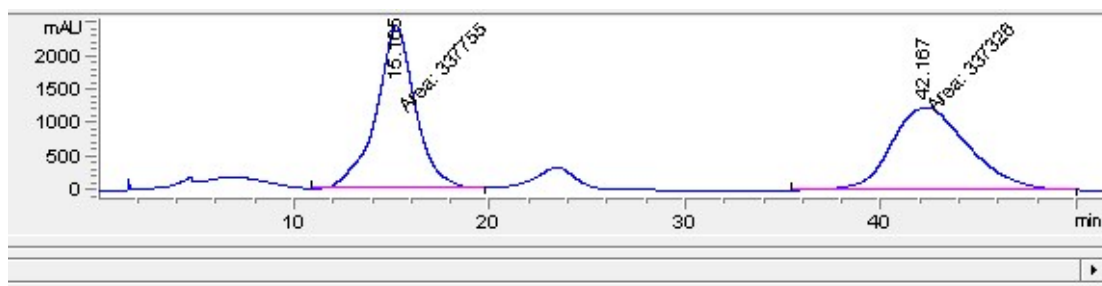

| # | Time   | Area     | Height | Width  | Area%  | Symmetry |
|---|--------|----------|--------|--------|--------|----------|
| 1 | 15.165 | 337755.3 | 2441.1 | 2.306  | 50.032 | 1.015    |
| 2 | 42.167 | 337326.4 | 1230.8 | 4.5677 | 49.968 | 0.734    |

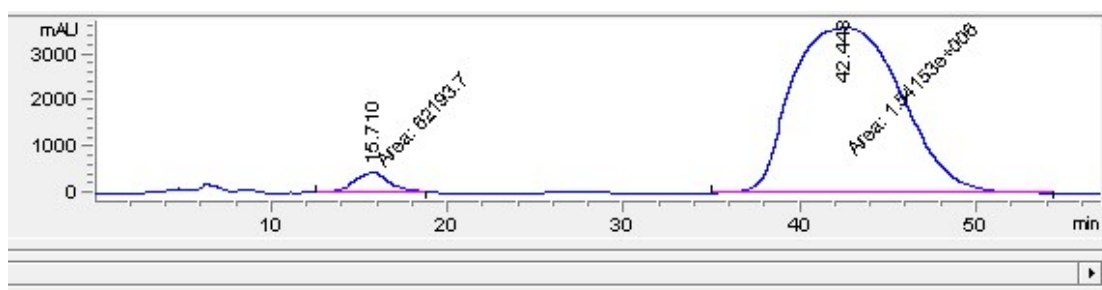

| # | Time   | Area      | Height | Width  | Area%  | Symmetry |
|---|--------|-----------|--------|--------|--------|----------|
| 1 | 15.71  | 62193.7   | 438.3  | 2.3652 | 3.878  | 1.053    |
| 2 | 42.448 | 1541525.9 | 3575   | 7.1866 | 96.122 | 0.871    |

# <sup>1</sup>H and <sup>13</sup>C NMR of 3fa

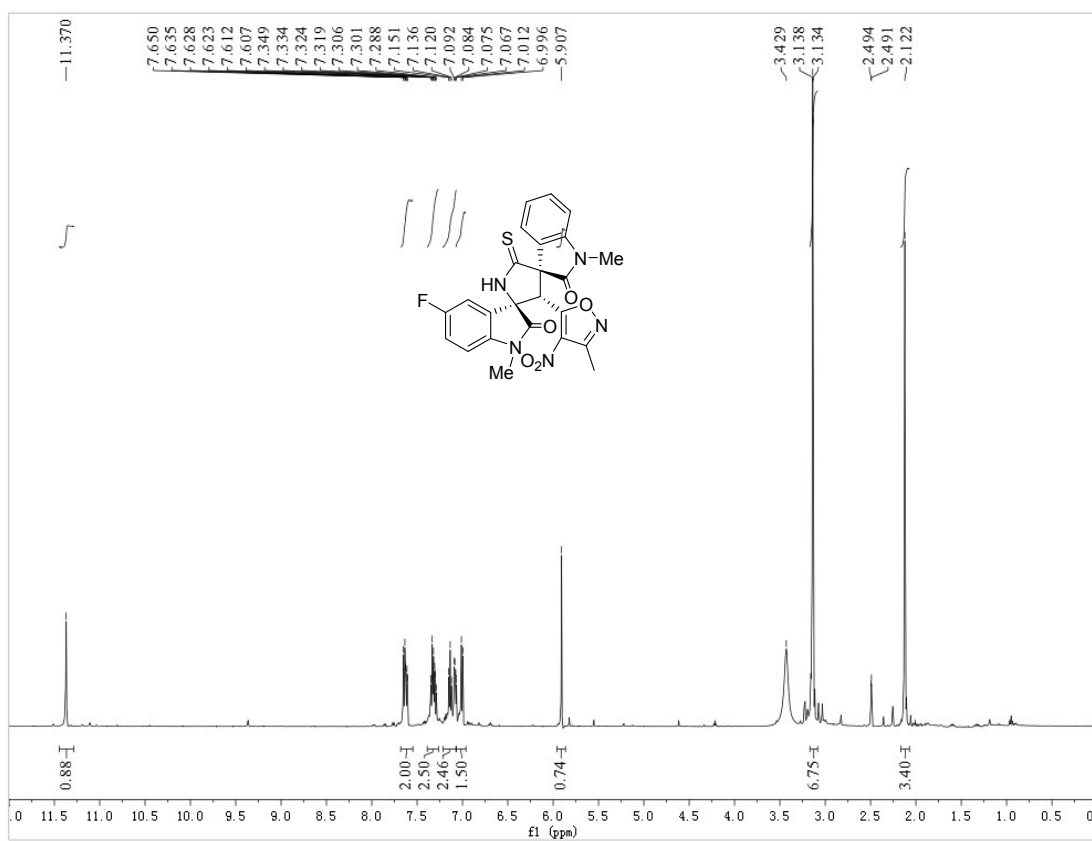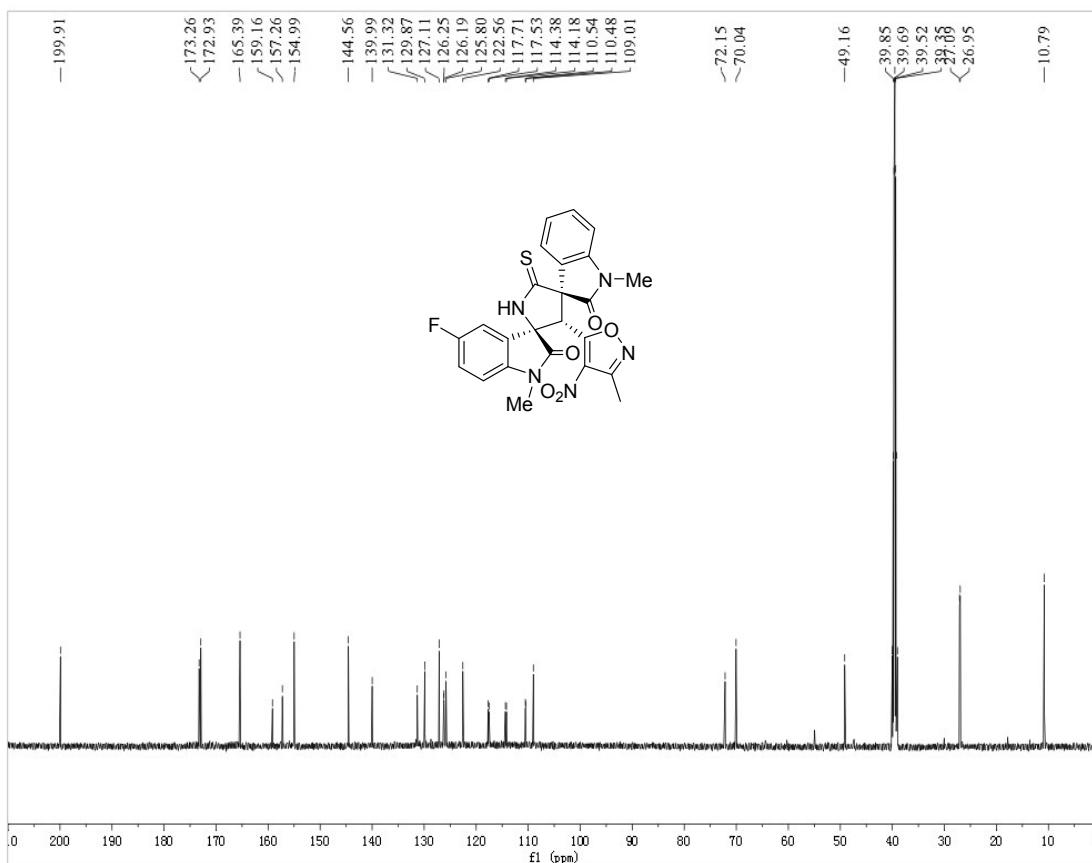



### HPLC of 3fa

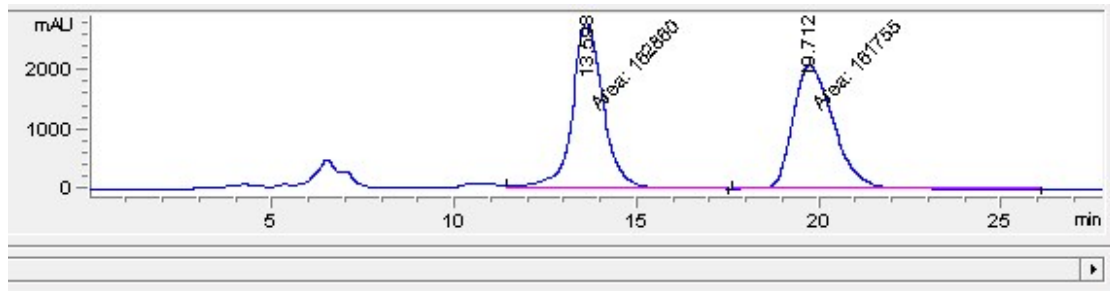

| # | Time   | Area     | Height | Width  | Area%  | Symmetry |
|---|--------|----------|--------|--------|--------|----------|
| 1 | 13.598 | 162860.4 | 2788.8 | 0.9733 | 50.170 | 0.874    |
| 2 | 19.712 | 161754.5 | 2099.5 | 1.2841 | 49.830 | 0.66     |

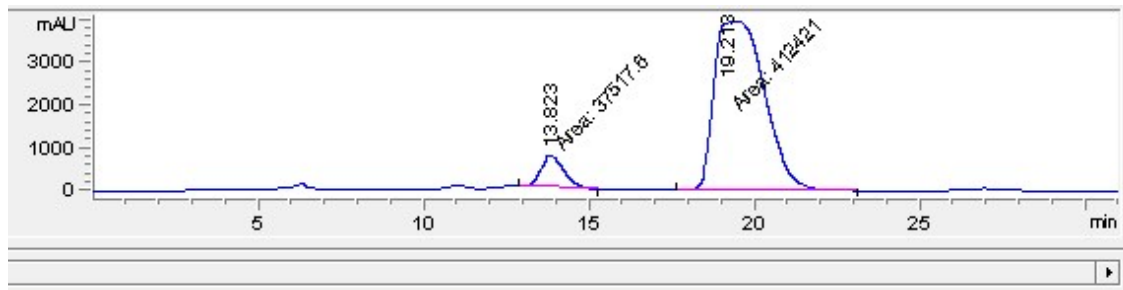

| # | Time   | Area     | Height | Width  | Area%  | Symmetry |
|---|--------|----------|--------|--------|--------|----------|
| 1 | 13.823 | 37517.6  | 747.8  | 0.8361 | 8.338  | 0.774    |
| 2 | 19.213 | 412421.3 | 3931.2 | 1.7485 | 91.662 | 0.429    |

# <sup>1</sup>H and <sup>13</sup>C NMR of 3fd

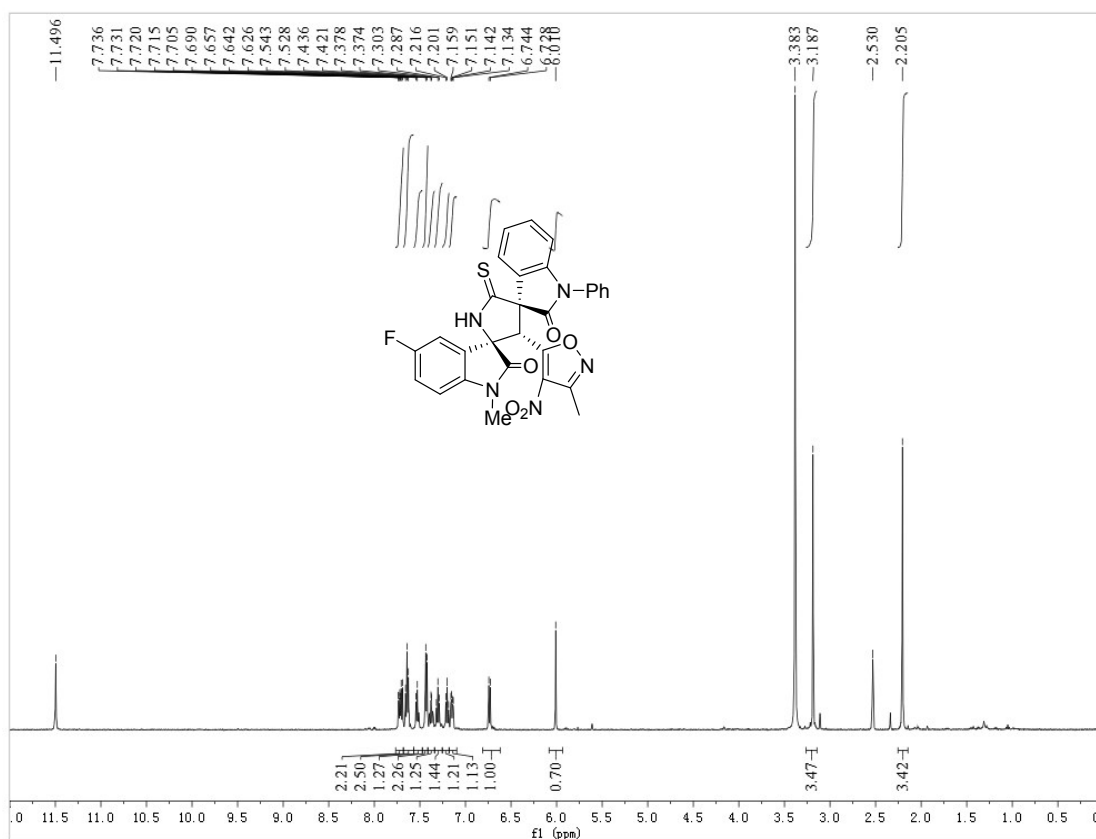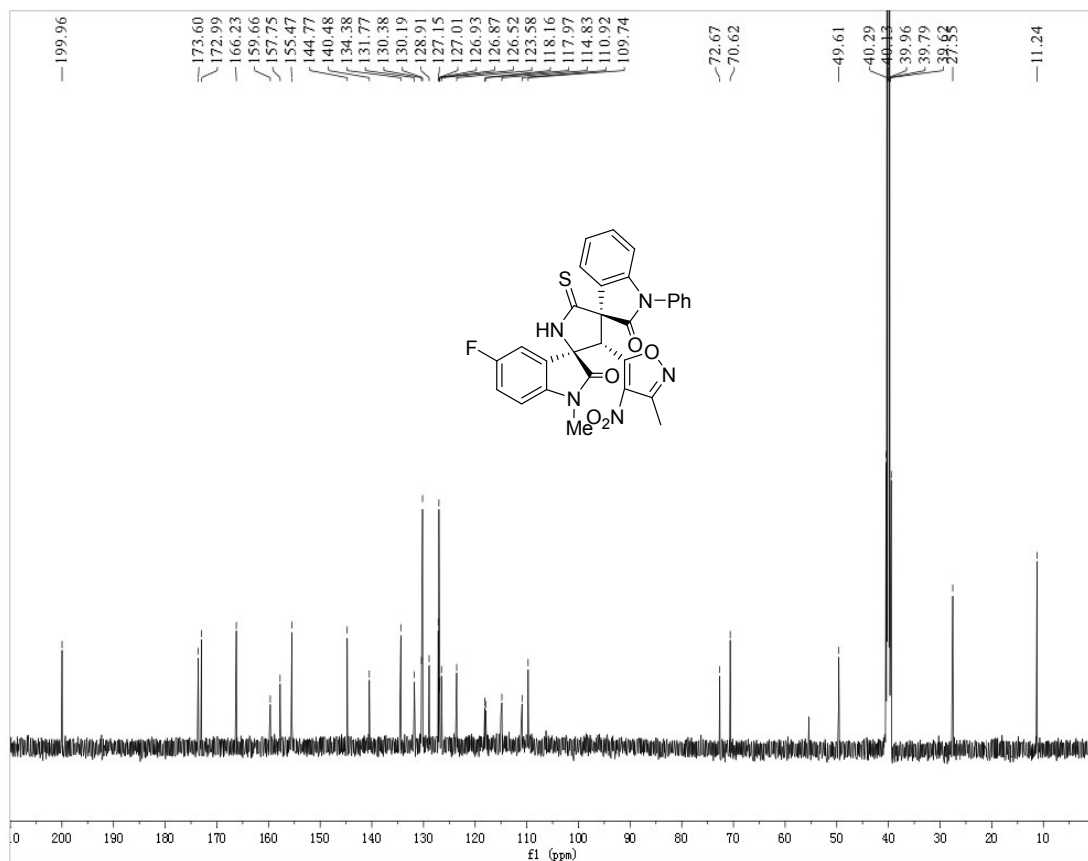

### HPLC of 3fd

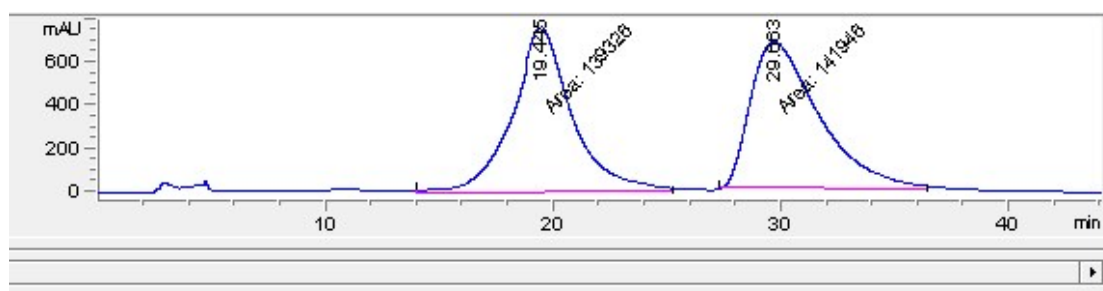

| # | Time   | Area     | Height | Width  | Area%  | Symmetry |
|---|--------|----------|--------|--------|--------|----------|
| 1 | 19.445 | 139325.9 | 763    | 3.0435 | 49.534 | 0.92     |
| 2 | 29.663 | 141946.5 | 675.9  | 3.5004 | 50.466 | 0.51     |

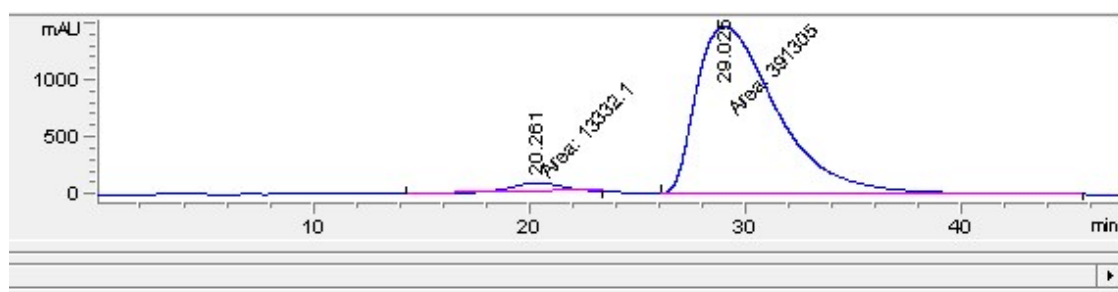

| # | Time   | Area     | Height | Width  | Area%  | Symmetry |
|---|--------|----------|--------|--------|--------|----------|
| 1 | 20.261 | 13332.1  | 83.3   | 2.668  | 3.295  | 0.994    |
| 2 | 29.025 | 391304.6 | 1474.9 | 4.4219 | 96.705 | 0.507    |

# <sup>1</sup>H and <sup>13</sup>C NMR of 3fe

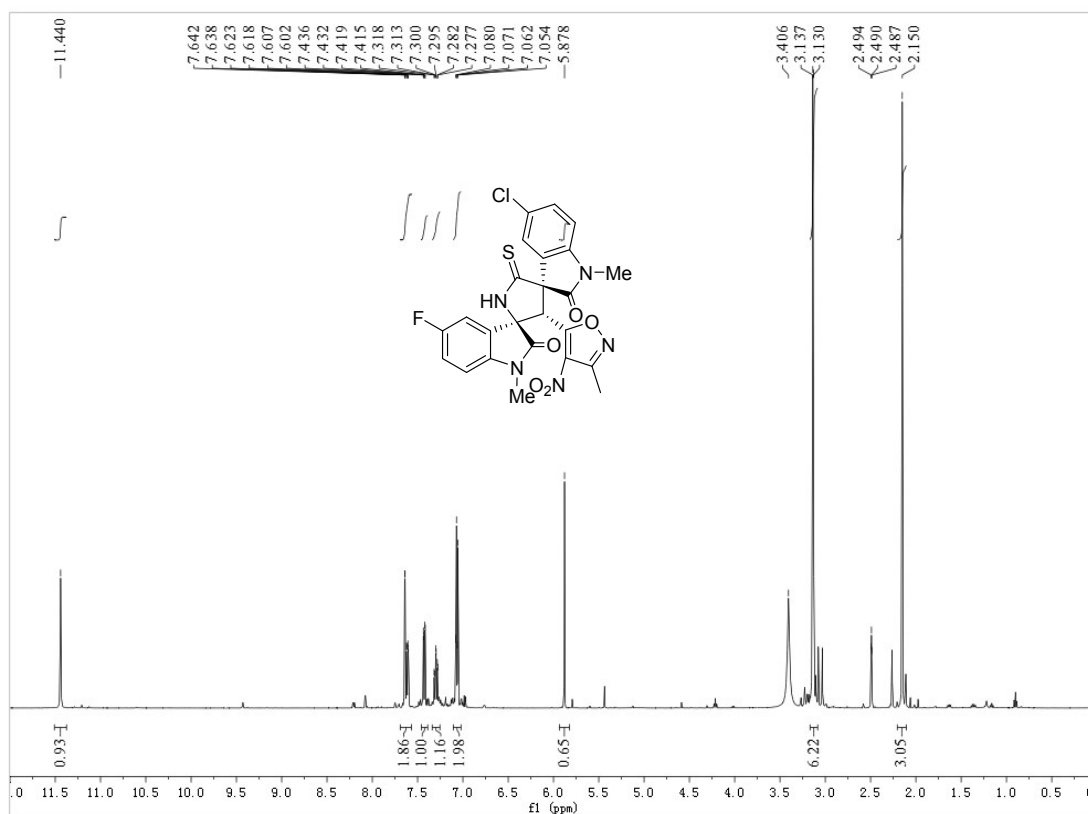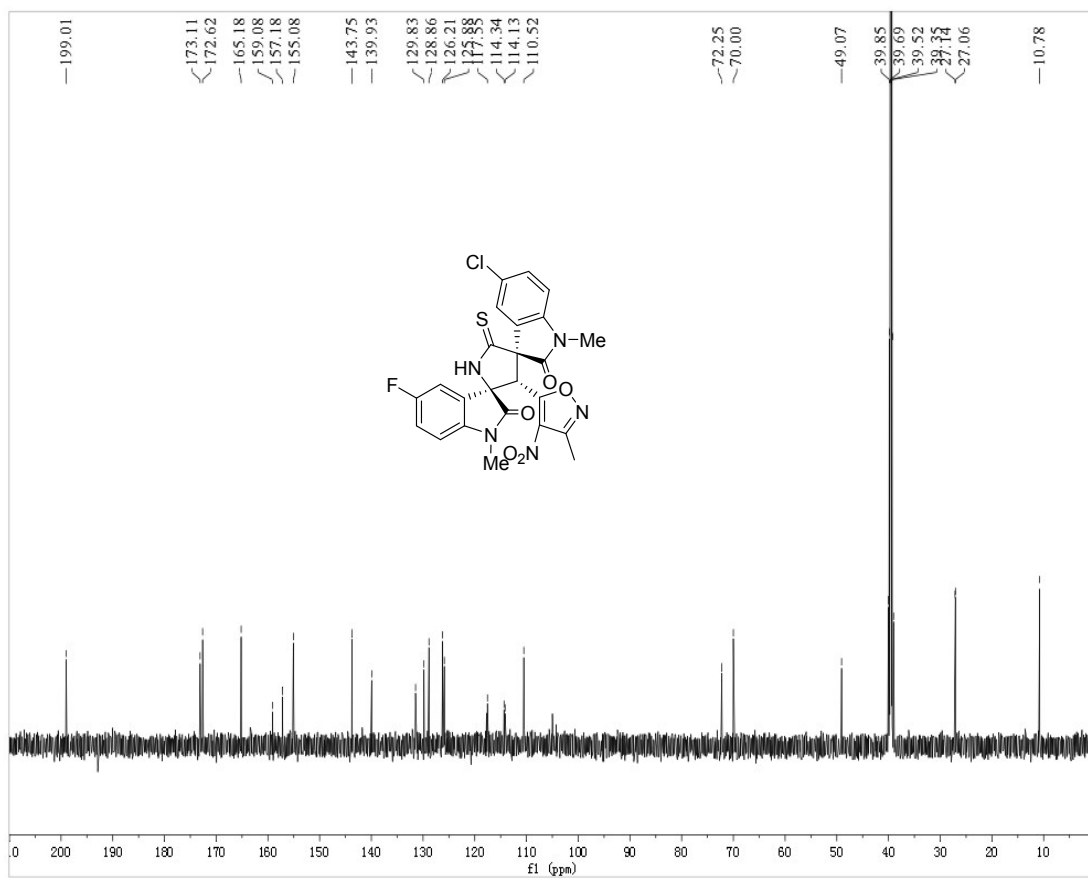

### HPLC of 3fe

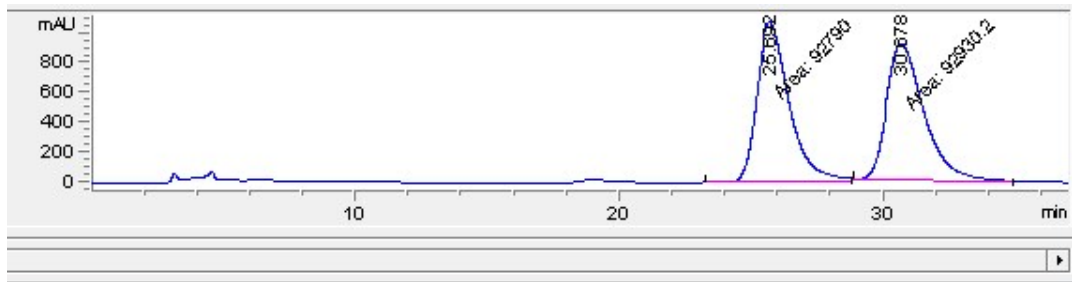

| # | Time   | Area    | Height | Width  | Area%  | Symmetry |
|---|--------|---------|--------|--------|--------|----------|
| 1 | 25.692 | 92790   | 1068   | 1.4481 | 49.962 | 0.669    |
| 2 | 30.678 | 92930.2 | 924.2  | 1.676  | 50.038 | 0.652    |

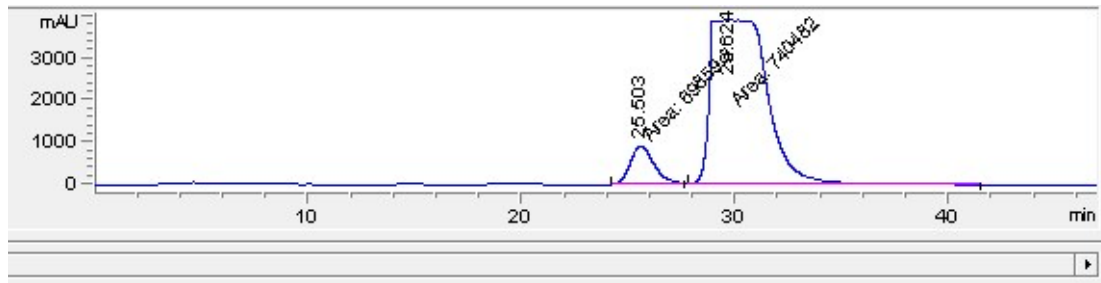

| # | Time   | Area     | Height | Width  | Area%  | Symmetry |
|---|--------|----------|--------|--------|--------|----------|
| 1 | 25.503 | 69859.8  | 897.6  | 1.2971 | 8.621  | 0.731    |
| 2 | 29.624 | 740482.1 | 3902.7 | 3.1623 | 91.379 | 0.441    |
